# Supplementary material for: Access to enantioenriched dihydroquinoxalinones via Cu-catalyzed propargylic substitution
Source: Royal Society of Chemistry journal article supplement (doi:10.1039/d4qo00080c), 2024-01-01

*Supporting Information for:*

## **Access to Enantioenriched Dihydroquinoxalinones via**

### **Cu-Catalyzed Propargylic Substitutions**

Yuxi Zhang,<sup>&</sup> Xiao Shu,<sup>&</sup> and Wusheng Guo\*

Frontier Institute of Science and Technology (FIST)

Xi'an Jiaotong University, China

*E-mail:* [wusheng.guo@mail.xjtu.edu.cn](mailto:wusheng.guo@mail.xjtu.edu.cn)

<sup>&</sup> *These authors contributed equally to this work*

#### **Contents:**

|          |                                                              |
|----------|--------------------------------------------------------------|
| Page S2  | General comments                                             |
| Page S2  | Synthesis of <b>L4</b>                                       |
| Page S3  | Selected screening data                                      |
| Page S6  | Typical procedure for the synthesis of dihydroquinoxalinones |
| Page S7  | Gram-scale reaction                                          |
| Page S7  | Synthetic transformations of <b>1</b>                        |
| Page S9  | Characterization data of all the new compounds               |
| Page S33 | X-ray crystallographic information of product <b>1</b>       |
| Page S40 | References                                                   |
| Page S41 | NMR spectra                                                  |

## General comments

Commercially available reagents and solvents were purchased from Energy, J&K, TCI, Aladdin or Daicel, and used without further purification.  $^1\text{H}$  NMR,  $^{13}\text{C}$  NMR and  $^{19}\text{F}$  NMR spectra were recorded at room temperature on a Bruker AV-400 spectrometer and referenced to the residual deuterated solvent signals. All reported NMR values are given in parts per million (ppm). FT-IR measurements were carried out on a Thermo Fisher Nicolet 6700 FT-IR spectrometer or Bruker ALPHA II. High resolution mass spectra (HRMS) were obtained on a WATERS I-Class VION IMS Qtof Spectrometer. The X-ray analysis of product **1** was collected at 100 K on a Rigaku Oxford Diffraction Supernova Dual Source, Cu at Zero equipped with an AtlasS2 CCD using Cu  $K\alpha$  radiation. Ligands **L1**, **L3** were synthesized according to a reported procedure.<sup>[1]</sup>

## Synthesis of L4

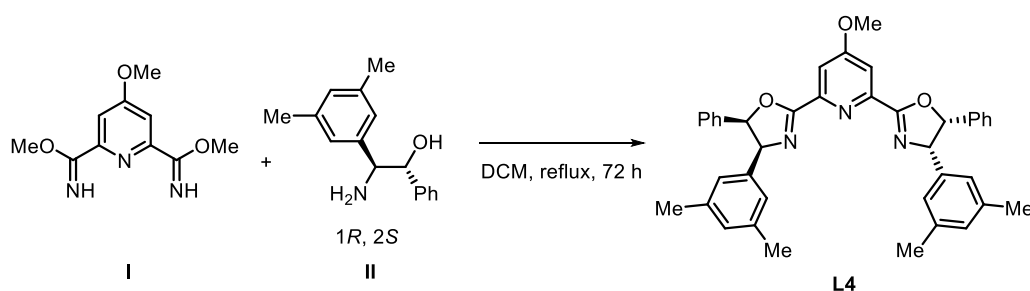

Compound **I** (305.8mg, 1.37 mmol) was suspended in dry DCM (15 mL). Commercially available compound **II** (1*R*,2*S*)-2-amino-2-(3,5-dimethylphenyl)-1-phenylethan-1-ol (662.75 mg, 2.75 mmol)<sup>[2]</sup> was added and the mixture was refluxed for 72 h. The solvent was evaporated and the remaining solid was washed with water (15 mL) and MeOH (15 mL). Followed a recrystallization procedure in ethyl acetate to afford the desired products as a white crystalline solid (465.7 mg, 56%).

## Selected screening data

Table S1. Investigation of the solvent effect<sup>a, b, c</sup>

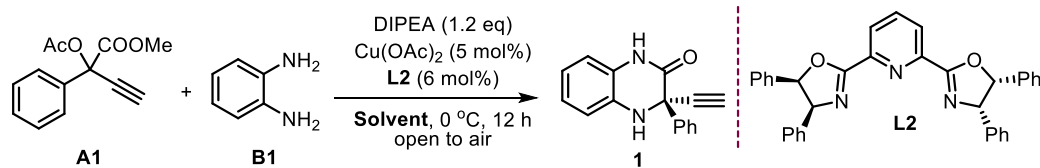

| Entry     | Solvent            | Conv. (%)  | Yield (%) | ee (%)    |
|-----------|--------------------|------------|-----------|-----------|
| 1         | THF                | 100        | 0         | -         |
| 2         | 1,4-Dioxane        | 100        | 0         | -         |
| 3         | 2-Methoxyethanol   | 100        | 0         | -         |
| 4         | H <sub>2</sub> O   | 100        | 0         | -         |
| 5         | ACN                | 100        | 0         | -         |
| 6         | DMF                | 100        | 0         | -         |
| 7         | DMSO               | 100        | 0         | -         |
| 8         | Hexane             | 95         | 70        | 0         |
| 9         | Benzene            | 100        | 0         | -         |
| 10        | EtOH               | 100        | 63        | 40        |
| 11        | MeOH               | 100        | 75        | 64        |
| 12        | DCM                | 100        | 0         | -         |
| 13        | Ethyl acetate      | 100        | 0         | -         |
| 14        | Benzotrifluoride   | 100        | 0         | -         |
| 15        | TOL                | 100        | 0         | -         |
| 16        | TFE                | 100        | 82        | 80        |
| <b>17</b> | <b>TFE/ACN=3/1</b> | <b>100</b> | <b>78</b> | <b>83</b> |

<sup>a</sup> Reaction conditions until otherwise noted: the **A1** (0.1 mmol), **B1** (0.12 mmol, 1.2 eq), solvent (0.5 mL). <sup>b</sup> The yield was determined by <sup>1</sup>H NMR spectrum of the reaction crude in the presence of 2-methylnaphthalene as internal standard. <sup>c</sup> The *ee* value was determined by HPLC equipped with a chiral column.

Table S2. Investigation of the effect of copper source <sup>a, b, c</sup>

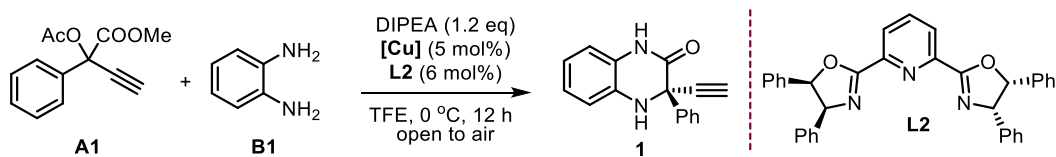

| Entry     | [M]                                                    | Conv. (%)  | Yield (%) | ee (%)    |
|-----------|--------------------------------------------------------|------------|-----------|-----------|
| 1         | Cupric acetylacetonate                                 | 100        | 68        | 80        |
| 2         | CuI                                                    | 100        | 74        | 80        |
| 3         | Cu(OTf) <sub>2</sub>                                   | 100        | 79        | 80        |
| 4         | Cu(MeCN) <sub>4</sub> PF <sub>6</sub>                  | 100        | 55        | 80        |
| 5         | Cu(MeCN) <sub>4</sub> BF <sub>4</sub>                  | 100        | 72        | 80        |
| 6         | CuCl                                                   | 100        | 80        | 80        |
| 7         | CuBr <sub>2</sub>                                      | 100        | 51        | 71        |
| 8         | CuBr                                                   | 100        | 79        | 80        |
| 9         | CuSO <sub>4</sub> · 5H <sub>2</sub> O                  | 100        | 67        | 80        |
| 10        | CuCN                                                   | 100        | 50        | 80        |
| 11        | Cu(ClO <sub>4</sub> ) <sub>2</sub> · 6H <sub>2</sub> O | 100        | 85        | 75        |
| <b>12</b> | <b>Cu(OAc)<sub>2</sub></b>                             | <b>100</b> | <b>82</b> | <b>80</b> |

<sup>a</sup> Reaction conditions until otherwise noted: the **A1** (0.1 mmol), **B1** (0.12 mmol, 1.2 eq), solvent (0.5 mL). <sup>b</sup> The yield was determined by <sup>1</sup>H NMR spectrum of the reaction crude in the presence of 2-methylnaphthalene as internal standard. <sup>c</sup> The ee value was determined by HPLC equipped with a chiral column.

Table S3. Investigation of the base effect <sup>a, b, c</sup>

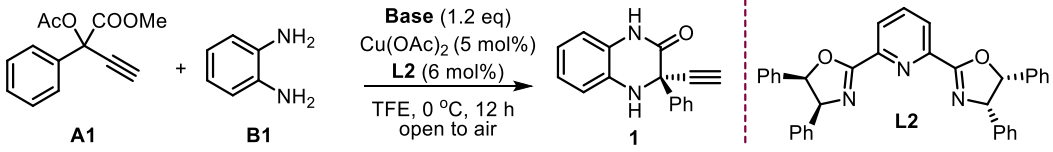

| Entry     | Base                             | Yield (%) | ee (%)    |
|-----------|----------------------------------|-----------|-----------|
| 1         | CsCO <sub>3</sub>                | 17        | 82        |
| 2         | K <sub>2</sub> CO <sub>3</sub>   | 60        | 82        |
| 3         | NaHCO <sub>3</sub>               | 48        | 40        |
| 4         | NaOAc                            | 37        | 42        |
| 5         | Na <sub>2</sub> CO <sub>3</sub>  | 71        | 66        |
| 6         | K <sub>2</sub> HPO <sub>4</sub>  | 68        | 80        |
| 7         | K <sub>3</sub> PO <sub>4</sub>   | 51        | 80        |
| 8         | NaH <sub>2</sub> PO <sub>4</sub> | 37        | 25        |
| 9         | Na <sub>2</sub> HPO <sub>4</sub> | 36        | 26        |
| 10        | Et <sub>3</sub> N                | 80        | 80        |
| 11        | DBU                              | 63        | 80        |
| 12        | -                                | 51        | 16        |
| 13        | DABCO                            | 67        | 80        |
| 14        | NEM                              | 61        | 46        |
| 15        | Cy <sub>2</sub> NMe              | 19        | 82        |
| 16        | TBD                              | 27        | 81        |
| 17        | Quinuclidine                     | 66        | 82        |
| 18        | Pyridine                         | 53        | 35        |
| <b>19</b> | <b>Triphenylguanidine</b>        | <b>81</b> | <b>83</b> |
| 20        | Piperazine                       | 54        | 81        |

<sup>a</sup> Reaction conditions until otherwise noted: the **A1** (0.1 mmol), **B1** (0.12 mmol, 1.2 eq), solvent (0.5 mL). <sup>b</sup> The yield was determined by <sup>1</sup>H NMR spectrum of the reaction crude in the presence of 2-methylnaphthalene as internal standard. <sup>c</sup> The *ee* value was determined by HPLC equipped with a chiral column.

Table S4. Investigation of the effect of temperature <sup>a, b, c</sup>

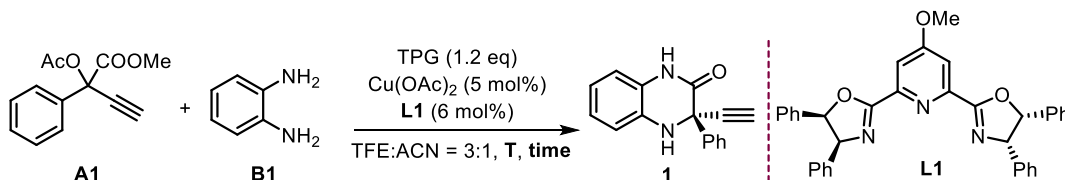

| Entry | T (°C) | Time (h) | Yield (%) | ee (%)    |
|-------|--------|----------|-----------|-----------|
| 1     | 0      | 12       | 78        | 84        |
| 2     | -20    | 36       | 87        | 87        |
| 3     | -30    | 36       | <b>70</b> | <b>90</b> |
| 4     | -40    | 72       | 85        | 87        |

<sup>a</sup> Reaction conditions until otherwise noted: the **A1** (0.1 mmol), **B1** (0.12 mmol, 1.2 eq), solvent (0.5 mL). <sup>b</sup> The yield was determined by <sup>1</sup>H NMR spectrum of the reaction crude in the presence of 2-methylnaphthalene as internal standard. <sup>c</sup> The *ee* value was determined by HPLC equipped with a chiral column.

#### Typical procedure for the synthesis of dihydroquinoxalinones

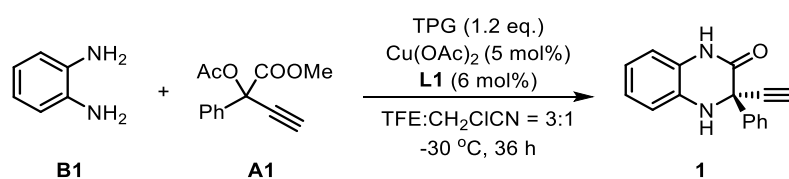

A mixture of Cu(OAc)<sub>2</sub> (0.9 mg, 0.005 mmol, 5 mol%) and **L1** (3.3 mg, 0.006 mmol, 6 mol%) in TFE/CH<sub>2</sub>ClCN (3/1, v/v, 0.5 mL) was stirred for 1 h at room temperature. Then, a solution of propargylic acetate **A1** (23.2 mg, 0.1 mmol, 1.0 eq.), *o*-phenylenediamine (13.0 mg, 0.12 mmol, 1.2 eq.) and TPG (1,2,3-triphenylguanidine) (34.4 mg, 0.12 mmol, 1.2 eq.) in a mixed solvent TFE/CH<sub>2</sub>ClCN (3/1, v/v, 0.5 mL) was added dropwise. The resulting mixture was stirred at -30 °C for 36 h. After that, the reaction mixture was filtered through a silica plug and concentrated under vacuo. The resultant crude was purified by column chromatography (PE:EA = 2:1) to afford the desired product **1** as a white solid (21.3 mg, 86%, 94% *ee*).

## Gram-scale reactions

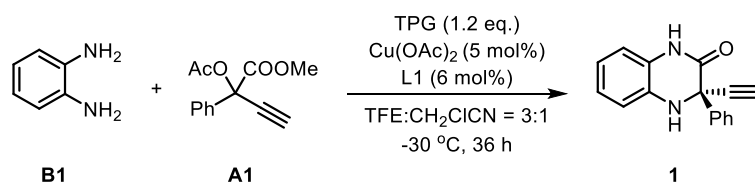

A mixture of Cu(OAc)<sub>2</sub> (45 mg, 0.25 mmol, 5 mol%) and **L1** (165 mg, 0.3 mmol, 6 mol%) in TFE/CH<sub>2</sub>ClCN (3/1, v/v, 25 mL) was stirred for 1 h at room temperature. Then, a solution of propargylic acetate **A1** (1.16 g, 5 mmol, 1.0 eq.), *o*-phenylenediamine (650 mg, 6 mmol, 1.2 eq.) and TPG (1,2,3-triphenylguanidine) (1.72 g, 6 mmol, 1.2 eq.) in the mixed solvent TFE/CH<sub>2</sub>ClCN (3/1, v/v, 25 mL) was added dropwise. The mixture was stirred at -30 °C for 36 h, and then filtered through a silica plug, concentrated in vacuo. The resultant crude was purified by column chromatography (PE:EA = 2:1) to afford the desired product **1** as a white solid (0.92 g, 74%, 92% *ee*).

## Synthetic transformations of product 1

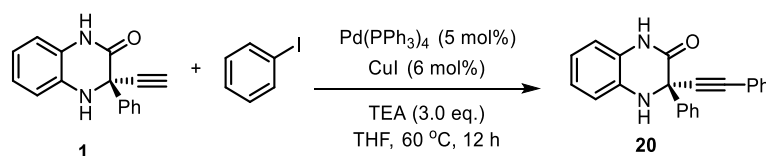

In a N<sub>2</sub>-filled glovebox, a 2 mL of screw-capped vial was charged with **1** (0.1 mmol, 24.8 mg, 1.0 eq.), iodobenzene (24.4 mg, 0.12 mmol, 1.2 eq.), Pd(PPh<sub>3</sub>)<sub>4</sub> (5.7 mg, 0.005 mmol, 5.0 mol%), CuI (1.0 mg, 0.006 mmol, 6.0 mol%), TEA (42 μL, 0.3 mmol, 3.0 eq.) and THF (0.5 mL). The reaction mixture was stirred at 60 °C for 12 h. After the completion of the reaction (monitored by TLC), the mixture was filtered through a silica plug and concentrated under reduced pressure. The resultant crude product was purified by column chromatography (PE:EA = 5:1) to afford the product **20** as a yellow solid (24.3 mg, 75%, 94% *ee*).

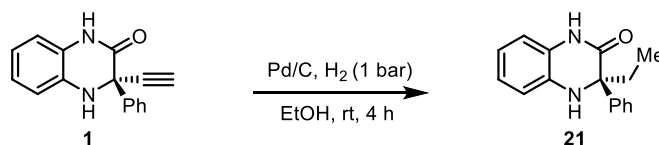

To a solution of **1** (24.8 mg, 0.1 mmol, 1.0 eq.) in EtOH (2 mL) was carefully added Pd/C (1.1 mg, 10 mol%) under nitrogen atmosphere. The reaction mixture was degassed and purged with hydrogen. The reaction is allowed to stir for 4 h at room

temperature. After the completion of the reaction, the mixture was filtered through a celite pad and washed with ethyl acetate. The solvents were removed and concentrated under reduced pressure. The resultant crude mixture was purified by column chromatography (PE:EA = 5:1) to afford the product **21** as a yellow solid (20.2 mg, 80%, 94% *ee*).

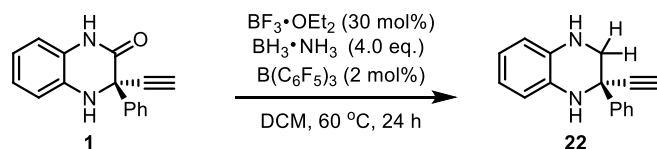

To a pressure tubing was added amide **1** (62.0 mg, 0.25 mmol),  $\text{B}(\text{C}_6\text{F}_5)_3$  (2.56 mg, 2 mol %),  $\text{NH}_3 \cdot \text{BH}_3$  (30.87 mg, 1.0 mmol, 4.0 eq.),  $\text{BF}_3 \cdot \text{OEt}_2$  (10.64 mg, 30 mol%) and DCM (1.5 mL). Then the reaction mixture was stirred at 60 °C for 24 h. After cooling to ambient temperature, the mixture was diluted with ethyl acetate (5 mL). Then aqueous NaOH (5 mL, 4 M) was added to the reaction mixture, and then was extracted with ethyl acetate (5 mL). The combined organic phases were dried over  $\text{Na}_2\text{SO}_4$ , filtered and evaporated under reduced pressure. After removal of volatile materials by rotary evaporation, the resultant mixture was purified by column chromatography (PE:EA = 5:1) to afford the corresponding pure product **22** as a yellow solid (42.7 mg, 73%, 97% *ee*).

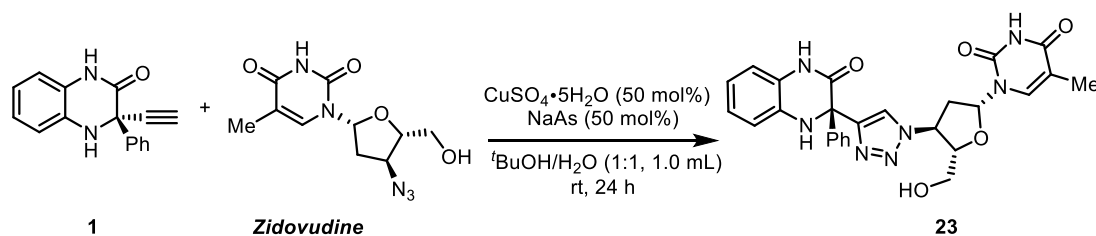

A screw-capped vial was charged with **1** (24.8 mg, 0.1 mmol), zidovudine (31 mg, 0.11 mmol) and  $t\text{BuOH}$  (0.5 mL). Afterward, a freshly prepared solution of sodium ascorbate (9.9 mg, 0.05 mmol) and  $\text{CuSO}_4 \cdot 5\text{H}_2\text{O}$  (12.5 mg, 0.05 mmol) in  $\text{H}_2\text{O}$  (0.5 mL) was added. The reaction mixture was stirred at room temperature for 24 h and then was extracted with EA (5 mL). The combined organic layer was dried over  $\text{Na}_2\text{SO}_4$  and concentrated under vacuum. The residue was then purified by column chromatography (DCM/MeOH = 25:1) to afford the desired product **23** (48.1 mg, 93%, 95% *ee*) as a white solid.



## Characterization data of all the new compounds

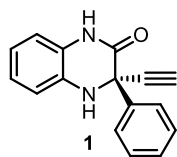

**(R)-3-ethynyl-3-phenyl-3,4-dihydroquinoxalin-2(1H)-one (1):** white solid; mp 154-155 °C; 21.4 mg, 86% yield; 94% *ee*;  $R_f = 0.4$  (PE:EA = 2:1);  $[\alpha]_D^{20} = -353.94$  ( $c = 1.65$ ,  $\text{CHCl}_3$ );  $^1\text{H NMR}$  (400 MHz,  $\text{CDCl}_3$ )  $\delta$  8.03 (s, 1H), 7.85-7.76 (m, 2H), 7.47-7.37 (m, 3H), 6.99 (td,  $J = 7.6, 1.3$  Hz, 1H), 6.88 (td,  $J = 7.6, 1.2$  Hz, 1H), 6.79 (dd,  $J = 7.1, 4.9$  Hz, 2H), 4.42 (s, 1H), 2.69 (s, 1H);  $^{13}\text{C NMR}$  (100 MHz,  $\text{CDCl}_3$ )  $\delta$  165.3, 138.3, 132.2, 129.1, 128.6, 127.8, 125.5, 124.2, 120.8, 115.7, 115.0, 81.2, 76.8, 61.4; IR (neat,  $\text{cm}^{-1}$ ) 3277, 1685, 1607, 1505, 1448, 1355, 1312, 749, 699; HRMS (ESI):  $m/z$ : calcd for  $\text{C}_{16}\text{H}_{12}\text{N}_2\text{O}_2\text{Na}$   $[\text{M}+\text{Na}]^+$ : 271.0847, found: 271.0852.

The *ee* was determined by HPLC analysis: CHIRALPAK ODH (4.6 mm i.d.  $\times$  250 mm); hexane/2-propanol = 85/15; flow rate 0.5 mL/min; 35 °C; 235 nm; retention time: 26.7 min (minor) and 42.7 min (major).

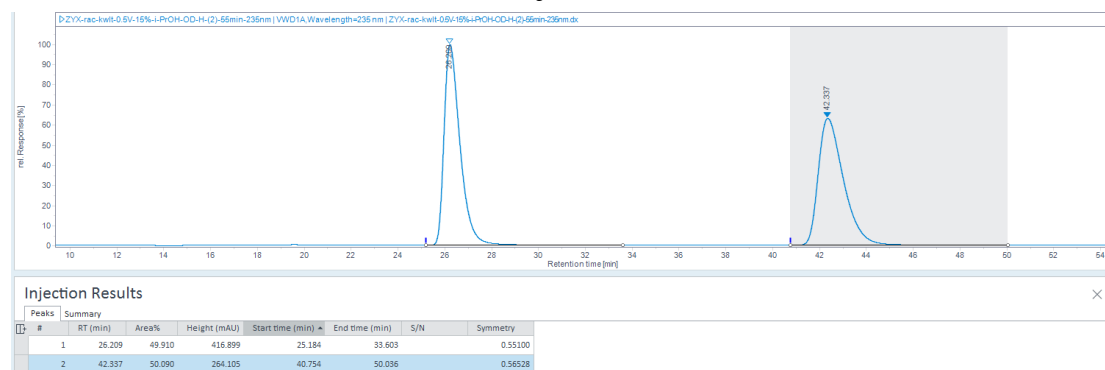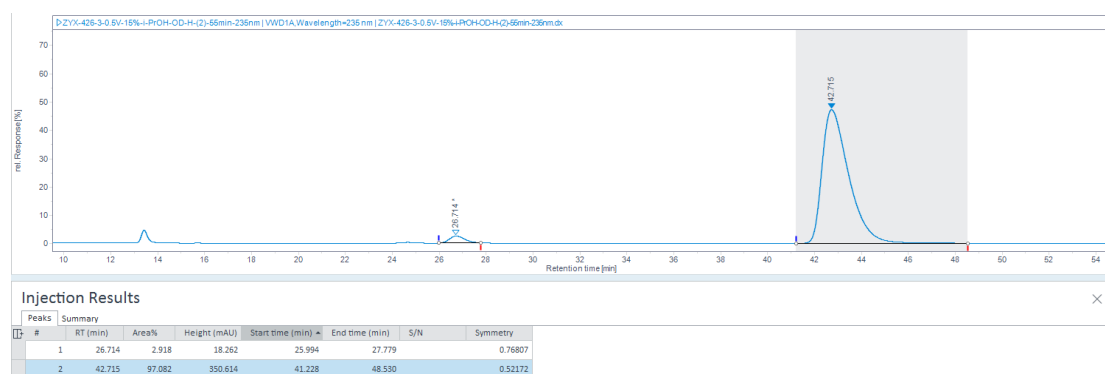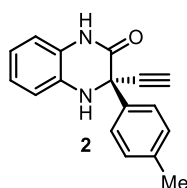

**(R)-3-ethynyl-3-(p-tolyl)-3,4-dihydroquinoxalin-2(1H)-one (2):** white solid; mp 91-93 °C; 21.2 mg, 81% yield; 92% *ee*;  $R_f = 0.4$  (PE:EA = 2:1);  $[\alpha]_D^{20} = -112.73$  ( $c = 1.10$ ,  $\text{CHCl}_3$ );  $^1\text{H NMR}$  (400 MHz,  $\text{CDCl}_3$ )  $\delta$  8.34 (s, 1H), 7.68 (d,  $J = 8.2$  Hz, 2H), 7.23 (d,  $J = 8.0$  Hz, 2H), 6.97 (td,  $J = 7.6, 1.3$  Hz, 1H), 6.86 (td,  $J = 7.6, 1.2$  Hz, 1H), 6.78 (d,  $J = 7.8$  Hz, 2H), 4.40 (s, 1H), 2.66 (s, 1H), 2.37 (s, 3H);  $^{13}\text{C NMR}$  (100 MHz,  $\text{CDCl}_3$ )  $\delta$  165.3, 139.0, 135.4, 132.3, 129.3, 127.6, 125.5, 124.1, 120.7, 115.5, 115.0, 81.3, 76.6, 61.2, 21.3; IR (neat,  $\text{cm}^{-1}$ ) 3279, 3057, 1684, 1607, 1505, 1447, 1353, 1311, 1227, 812, 744; HRMS (ESI):  $m/z$ : calcd for  $\text{C}_{17}\text{H}_{14}\text{N}_2\text{ONa}$   $[\text{M}+\text{Na}]^+$ : 285.1004, found: 285.1010.

The *ee* was determined by HPLC analysis: CHIRALPAK ODH (4.6 mm i.d.  $\times$  250 mm); hexane/2-propanol = 85/15; flow rate 0.5 mL/min; 35 °C; 235 nm; retention time: 28.7 min (minor) and 43.0 min (major).

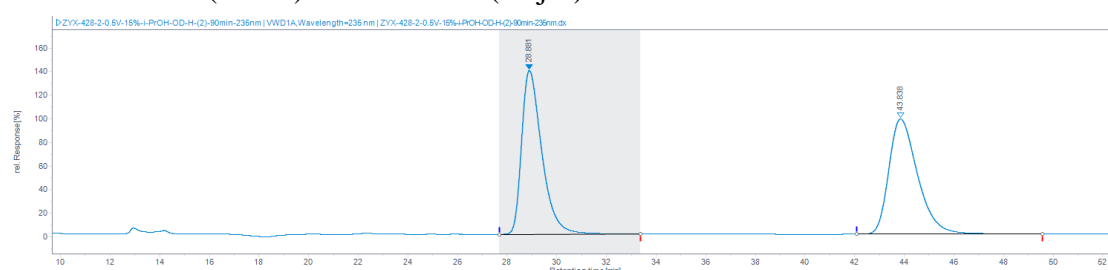

| Injection Results |          |         |              |                  |                |     |          |
|-------------------|----------|---------|--------------|------------------|----------------|-----|----------|
| Peaks             |          | Summary |              |                  |                |     |          |
| #                 | RT (min) | Area%   | Height (mAU) | Start time (min) | End time (min) | S/N | Symmetry |
| 1                 | 28.881   | 49.858  | 152.107      | 27.701           | 33.376         |     | 0.58031  |
| 2                 | 43.838   | 50.142  | 107.035      | 42.074           | 49.559         |     | 0.64727  |

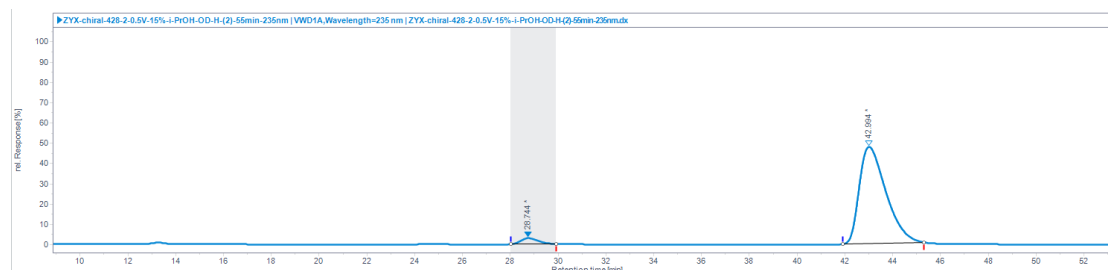

| Injection Results |          |         |              |                  |                |     |          |
|-------------------|----------|---------|--------------|------------------|----------------|-----|----------|
| Peaks             |          | Summary |              |                  |                |     |          |
| #                 | RT (min) | Area%   | Height (mAU) | Start time (min) | End time (min) | S/N | Symmetry |
| 1                 | 28.744   | 3.789   | 51.221       | 28.034           | 29.934         |     | 0.72113  |
| 2                 | 42.994   | 96.211  | 512.662      | 41.894           | 45.288         |     | 0.55156  |

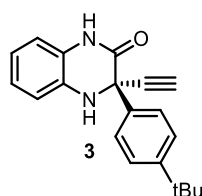

**(R)-3-(4-(tert-butyl)phenyl)-3-ethynyl-3,4-dihydroquinoxalin-2(1H)-one (3):** white solid; mp 82-83 °C; 21.9 mg, 72% yield; 93% *ee*;  $R_f = 0.4$  (PE:EA = 2:1);  $[\alpha]_D^{20} = -233.68$  ( $c = 0.95$ ,  $\text{CHCl}_3$ );  $^1\text{H NMR}$  (400 MHz,  $\text{CDCl}_3$ )  $\delta$  8.74 (s, 1H), 7.73 (d,  $J = 8.5$  Hz, 2H), 7.44 (d,  $J = 8.5$  Hz, 2H), 6.96 (td,  $J = 7.6, 1.2$  Hz, 1H), 6.84 (t,  $J = 7.5$  Hz, 1H), 6.81-6.72 (m, 2H), 4.42 (s, 1H), 2.66 (s, 1H), 1.33 (s, 9H);  $^{13}\text{C NMR}$  (100

MHz, CDCl<sub>3</sub>)  $\delta$  165.5, 152.0, 135.4, 132.3, 127.4, 125.6, 125.5, 124.1, 120.6, 115.7, 114.9, 81.4, 76.5, 61.1, 34.7, 31.4; IR (neat, cm<sup>-1</sup>) 3283, 2952, 1686, 1608, 1506, 1459, 1360, 1311, 735; HRMS (ESI):  $m/z$ : calcd for C<sub>20</sub>H<sub>20</sub>N<sub>2</sub>ONa [M+Na]<sup>+</sup>: 327.1473, found: 327.1473.

The *ee* was determined by HPLC analysis: CHIRALPAK ODH (4.6 mm i.d.  $\times$  250 mm); hexane/2-propanol = 85/15; flow rate 0.5 mL/min; 35 °C; 235 nm; retention time: 22.6 min (minor) and 29.4 min (major).

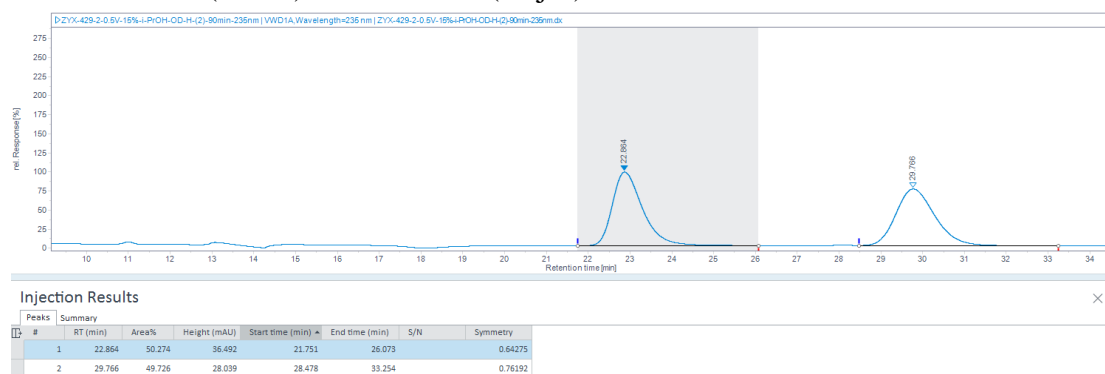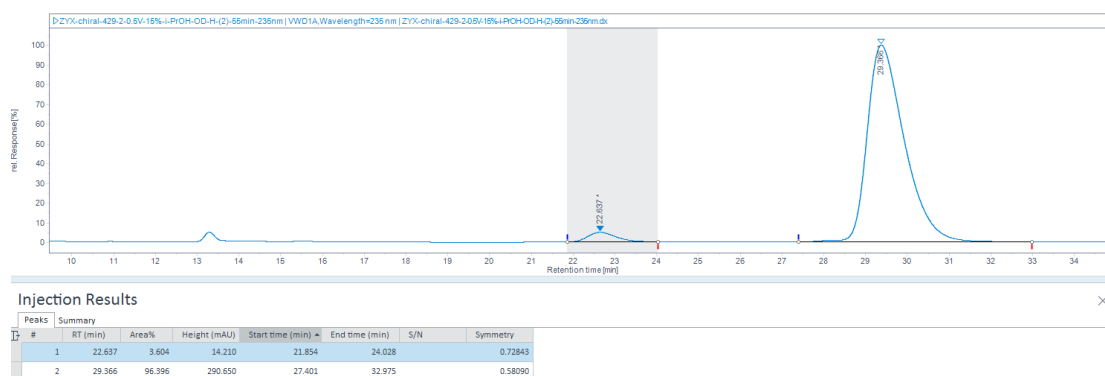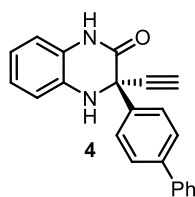

**(R)-3-([1,1'-biphenyl]-4-yl)-3-ethynyl-3,4-dihydroquinoxalin-2(1H)-one (4):** white solid; mp 59-61 °C; 24.3 mg, 75% yield; 93% *ee*;  $R_f$  = 0.3 (PE:EA = 2:1);  $[\alpha]_D^{20}$  = -128.18 ( $c$  = 1.10, CHCl<sub>3</sub>); <sup>1</sup>H NMR (400 MHz, CDCl<sub>3</sub>)  $\delta$  8.67 (s, 1H), 7.96-7.83 (m, 2H), 7.74-7.54 (m, 4H), 7.52-7.41 (m, 2H), 7.41-7.34 (m, 1H), 6.98 (td,  $J$  = 7.6, 1.5 Hz, 1H), 6.86 (td,  $J$  = 7.7, 1.2 Hz, 1H), 6.83-6.75 (m, 2H), 4.47 (s, 1H), 2.71 (s, 1H); <sup>13</sup>C NMR (100 MHz, CDCl<sub>3</sub>)  $\delta$  165.3, 142.0, 140.7, 137.3, 132.2, 128.9, 128.2, 127.7, 127.4, 127.3, 125.5, 124.2, 120.8, 115.7, 115.0, 81.2, 76.9, 61.2; IR (neat, cm<sup>-1</sup>) 3283, 3058, 2925, 1685, 1607, 1505, 1355, 1311, 909, 733, 697, 655; HRMS (ESI):  $m/z$ : calcd for C<sub>22</sub>H<sub>16</sub>N<sub>2</sub>ONa [M+Na]<sup>+</sup>: 347.1160, found: 347.1161.

The *ee* was determined by HPLC analysis: CHIRALPAK ODH (4.6 mm i.d. × 250 mm); hexane/2-propanol = 85/15; flow rate 0.5 mL/min; 35 °C; 235 nm; retention time: 46.8 min (minor) and 57.7 min (major).

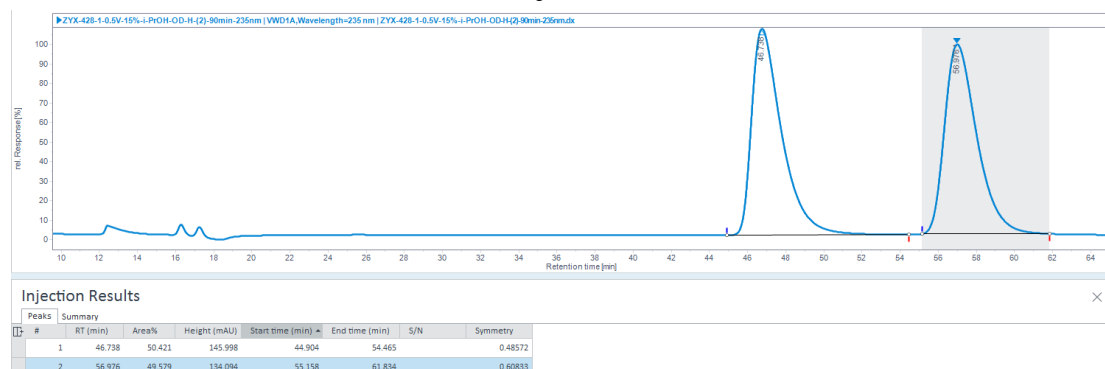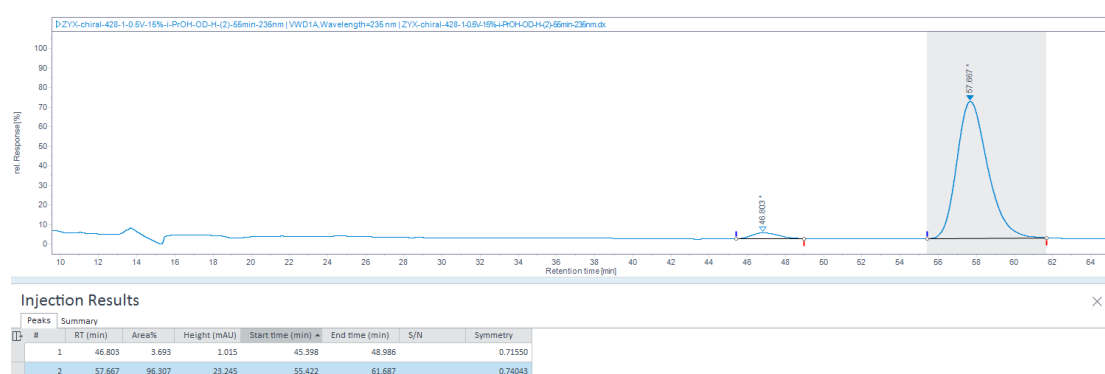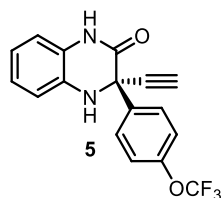

**(R)-3-ethynyl-3-(4-(trifluoromethoxy)phenyl)-3,4-dihydroquinoxalin-2(1H)-one (5):** yellow solid; mp 94-95 °C; 25.2 mg, 76% yield; 89% *ee*;  $R_f = 0.3$  (PE:EA = 2:1);  $[\alpha]_D^{20} = -228.57$  ( $c = 1.05$ ,  $\text{CHCl}_3$ );  $^1\text{H NMR}$  (400 MHz,  $\text{CDCl}_3$ )  $\delta$  8.25 (s, 1H), 7.86 (d,  $J = 8.7$  Hz, 2H), 7.31-7.26 (m, 2H), 7.00 (t,  $J = 7.6$  Hz, 1H), 6.90 (t,  $J = 7.6$  Hz, 1H), 6.85-6.75 (m, 2H), 4.40 (s, 1H), 2.70 (s, 1H);  $^{13}\text{C NMR}$  (100 MHz,  $\text{CDCl}_3$ )  $\delta$  164.7, 149.8, 136.8, 132.0, 129.6, 125.4, 124.4, 121.1, 120.84, 120.6 (q,  $J = 258.6$  Hz), 115.6, 115.2, 80.7, 77.3, 61.0;  $^{19}\text{F NMR}$  (376 MHz,  $\text{CDCl}_3$ )  $\delta$  -57.72; IR (neat,  $\text{cm}^{-1}$ ) 3289, 3068, 1686, 1609, 1506, 1258, 1167, 748; HRMS (ESI):  $m/z$ : calcd for  $\text{C}_{17}\text{H}_{11}\text{N}_2\text{O}_2\text{NaF}_3$   $[\text{M}+\text{Na}]^+$ : 355.0670, found: 355.0676.

The *ee* was determined by HPLC analysis: CHIRALPAK ODH (4.6 mm i.d. × 250 mm); hexane/2-propanol = 85/15; flow rate 0.5 mL/min; 35 °C; 235 nm; retention time: 17.2 min (minor) and 22.9 min (major).

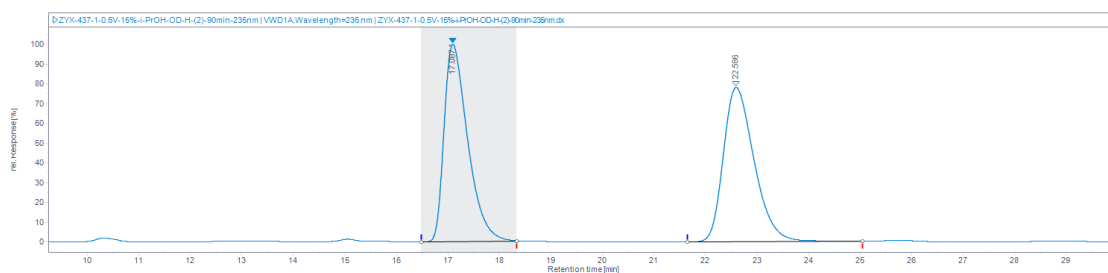

| Injection Results |          |         |              |                  |                |         |
|-------------------|----------|---------|--------------|------------------|----------------|---------|
| Peaks             |          | Summary |              |                  |                |         |
| #                 | RT (min) | Area%   | Height (mAU) | Start time (min) | End time (min) | S/N     |
| 1                 | 17.087   | 49.457  | 1059.197     | 16.476           | 18.327         | 0.55264 |
| 2                 | 22.586   | 50.543  | 828.018      | 21.646           | 25.039         | 0.67214 |

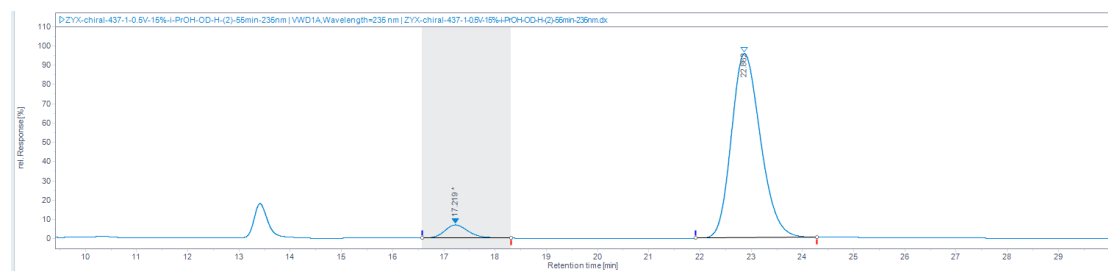

| Injection Results |          |         |              |                  |                |         |
|-------------------|----------|---------|--------------|------------------|----------------|---------|
| Peaks             |          | Summary |              |                  |                |         |
| #                 | RT (min) | Area%   | Height (mAU) | Start time (min) | End time (min) | S/N     |
| 1                 | 17.219   | 5.458   | 14.067       | 16.569           | 18.314         | 0.77921 |
| 2                 | 22.862   | 94.542  | 198.205      | 21.916           | 24.276         | 0.78027 |

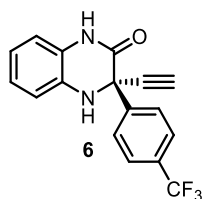

**(R)-3-ethynyl-3-(4-(trifluoromethyl)phenyl)-3,4-dihydroquinoxalin-2(1H)-one (6):** yellow solid; mp 75-76 °C; 25.3 mg, 80% yield; 89% *ee*;  $R_f = 0.4$  (PE:EA = 2:1);  $[\alpha]_D^{20} = -264.00$  ( $c = 0.50$ ,  $\text{CHCl}_3$ );  $^1\text{H NMR}$  (400 MHz,  $\text{CDCl}_3$ )  $\delta$  8.28 (s, 1H), 7.96 (d,  $J = 8.2$  Hz, 2H), 7.69 (d,  $J = 8.3$  Hz, 2H), 7.01 (t,  $J = 7.6$  Hz, 1H), 6.90 (t,  $J = 7.5$  Hz, 1H), 6.81 (t,  $J = 7.6$  Hz, 2H), 4.42 (s, 1H), 2.72 (s, 1H);  $^{13}\text{C NMR}$  (100 MHz,  $\text{CDCl}_3$ ) one carbon signal was overlapped  $\delta$  164.4, 142.1, 131.9, 131.3 (q,  $J = 32.3$  Hz), 128.4, 125.6 (q,  $J = 4.0$  Hz), 125.3, 124.4, 121.2, 115.7, 115.3, 109.6 (q,  $J = 269.8$  Hz), 80.5, 61.2;  $^{19}\text{F NMR}$  (376 MHz,  $\text{CDCl}_3$ )  $\delta$  -62.67; IR (neat,  $\text{cm}^{-1}$ ) 3293, 1687, 1609, 1506, 1411, 1325, 1167, 1069, 749; HRMS (ESI):  $m/z$ : calcd for  $\text{C}_{17}\text{H}_{11}\text{N}_2\text{OF}_3\text{Na}$   $[\text{M}+\text{Na}]^+$ : 339.0721, found: 339.0724.

The *ee* was determined by HPLC analysis: CHIRALPAK ODH (4.6 mm i.d.  $\times$  250 mm); hexane/2-propanol = 85/15; flow rate 0.5 mL/min; 35 °C; 235 nm; retention time: 19.1 min (minor) and 25.8 min (major).

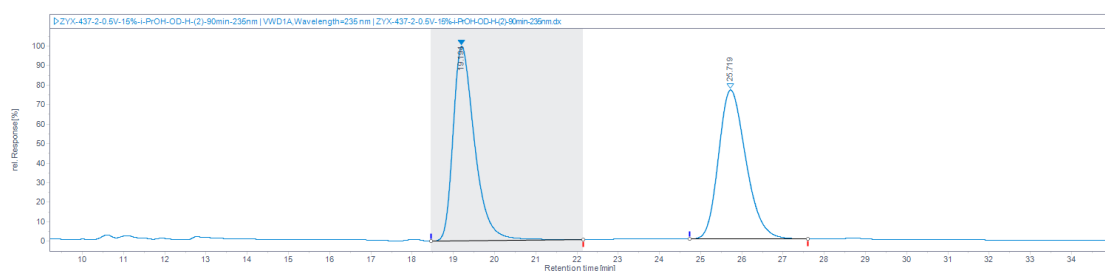

**Injection Results**

| # | RT (min) | Area%  | Height (mAU) | Start time (min) | End time (min) | S/N     | Symmetry |
|---|----------|--------|--------------|------------------|----------------|---------|----------|
| 1 | 19.194   | 50.776 | 280.759      | 18.458           | 22.150         | 0.61592 |          |
| 2 | 25.719   | 49.224 | 214.795      | 24.728           | 27.597         | 0.74740 |          |

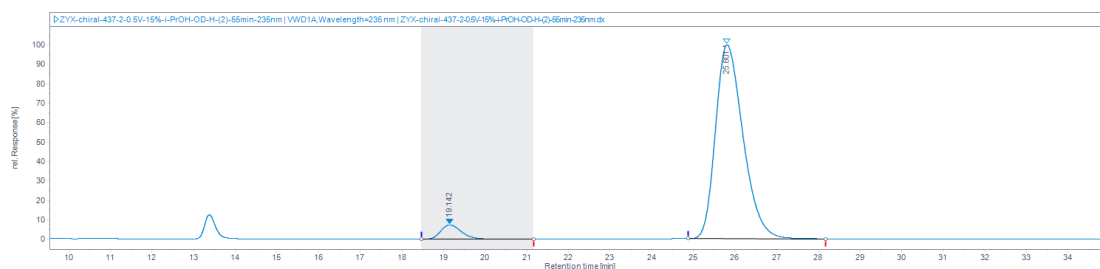

**Injection Results**

| # | RT (min) | Area%  | Height (mAU) | Start time (min) | End time (min) | S/N     | Symmetry |
|---|----------|--------|--------------|------------------|----------------|---------|----------|
| 1 | 19.142   | 5.422  | 32.237       | 18.470           | 21.170         | 0.72982 |          |
| 2 | 25.801   | 94.578 | 429.818      | 24.876           | 28.168         | 0.69002 |          |

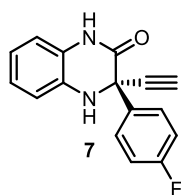

**(R)-3-ethynyl-3-(4-fluorophenyl)-3,4-dihydroquinoxalin-2(1H)-one (7):** yellow solid; mp 90-92 °C; 21.5 mg, 81% yield; 90% *ee*;  $R_f = 0.4$  (PE:EA = 2:1);  $[\alpha]_D^{20} = -159.41$  ( $c = 1.20$ ,  $\text{CHCl}_3$ );  $^1\text{H NMR}$  (400 MHz,  $\text{CDCl}_3$ )  $\delta$  8.26 (s, 1H), 7.69 (d,  $J = 8.6$  Hz, 2H), 7.55 (d,  $J = 8.6$  Hz, 2H), 7.00 (t,  $J = 7.6$  Hz, 1H), 6.89 (t,  $J = 7.6$  Hz, 1H), 6.80 (t,  $J = 6.6$  Hz, 2H), 4.39 (s, 1H), 2.69 (s, 1H);  $^{13}\text{C NMR}$  (100 MHz,  $\text{CDCl}_3$ )  $\delta$  165.0, 163.2 (d,  $J = 247.0$  Hz), 134.0 (d,  $J = 3.0$  Hz), 132.1, 129.8 (d,  $J = 9.1$  Hz), 125.4, 124.3, 121.0, 115.6 (d,  $J = 7.1$  Hz), 115.4, 115.1, 81.0, 77.1, 60.9;  $^{19}\text{F NMR}$  (376 MHz,  $\text{CDCl}_3$ )  $\delta$  -113.08; IR (neat,  $\text{cm}^{-1}$ ) 3290, 3063, 1684, 1606, 1505, 1355, 1312, 1226, 837, 746; HRMS (ESI):  $m/z$ : calcd for  $\text{C}_{16}\text{H}_{11}\text{N}_2\text{OFNa}$   $[\text{M}+\text{Na}]^+$ : 289.0753, found: 289.0756.

The *ee* was determined by HPLC analysis: CHIRALPAK ODH (4.6 mm i.d.  $\times$  250 mm); hexane/2-propanol = 85/15; flow rate 0.5 mL/min; 35 °C; 235 nm; retention time: 24.4 min (minor) and 32.9 min (major).

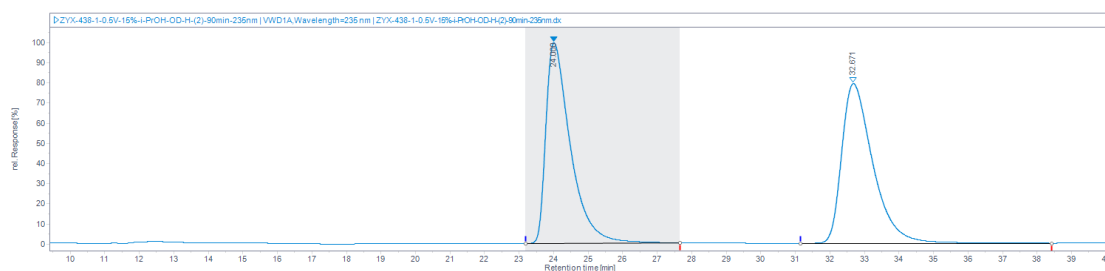

#### Injection Results

| # | RT (min) | Area%  | Height (mAU) | Start time (min) | End time (min) | S/N     | Symmetry |
|---|----------|--------|--------------|------------------|----------------|---------|----------|
| 1 | 24.000   | 49.654 | 681.517      | 23.195           | 27.656         | 0.45580 |          |
| 2 | 32.671   | 50.366 | 541.896      | 31.152           | 38.419         | 0.55837 |          |

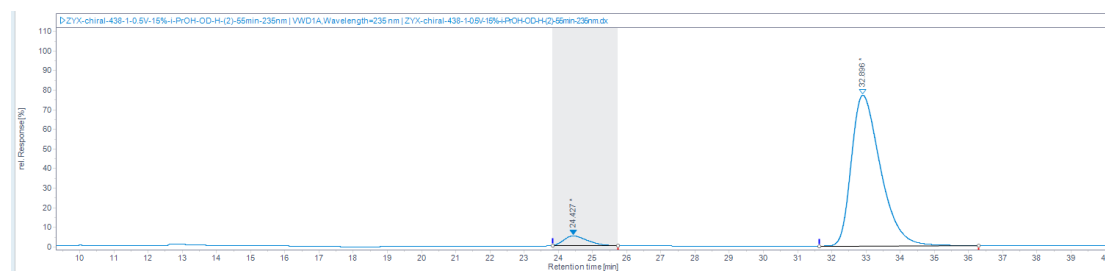

#### Injection Results

| # | RT (min) | Area%  | Height (mAU) | Start time (min) | End time (min) | S/N     | Symmetry |
|---|----------|--------|--------------|------------------|----------------|---------|----------|
| 1 | 24.427   | 4.831  | 24.937       | 23.837           | 25.754         | 0.61740 |          |
| 2 | 32.896   | 95.169 | 393.814      | 31.634           | 36.304         | 0.60866 |          |

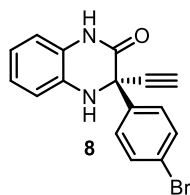

**(R)-3-(4-bromophenyl)-3-ethynyl-3,4-dihydroquinoxalin-2(1H)-one (8):** yellow solid; mp 113-115 °C; 25.4 mg, 78% yield; 92% *ee*;  $R_f = 0.3$  (PE:EA = 2:1);  $[\alpha]_D^{20} = -231.18$  ( $c = 1.70$ ,  $\text{CHCl}_3$ );  $^1\text{H NMR}$  (400 MHz,  $\text{CDCl}_3$ )  $\delta$  8.27 (s, 1H), 7.69 (d,  $J = 8.7$  Hz, 2H), 7.55 (d,  $J = 8.7$  Hz, 2H), 6.99 (td,  $J = 7.6, 1.3$  Hz, 1H), 6.89 (td,  $J = 7.6, 1.2$  Hz, 1H), 6.80 (t,  $J = 6.5$  Hz, 2H), 4.39 (s, 1H), 2.69 (s, 1H);  $^{13}\text{C NMR}$  (100 MHz,  $\text{CDCl}_3$ ) one carbon signal was overlapped  $\delta$  164.6, 137.3, 132.0, 131.7, 129.6, 125.4, 124.3, 123.5, 121.1, 115.6, 115.2, 80.7, 61.1; IR (neat,  $\text{cm}^{-1}$ ) 3287, 1686, 1608, 1505, 1486, 1312, 1074, 1011, 748; HRMS (ESD):  $m/z$ : calcd for  $\text{C}_{16}\text{H}_{11}\text{N}_2\text{ONa}^{79}\text{Br}$   $[\text{M}+\text{Na}]^+$ : 348.9952, found: 348.9958.

The *ee* was determined by HPLC analysis: CHIRALPAK ODH (4.6 mm i.d.  $\times$  250 mm); hexane/2-propanol = 85/15; flow rate 0.5 mL/min; 35 °C; 235 nm; retention time: 27.9 min (minor) and 36.4 min (major).

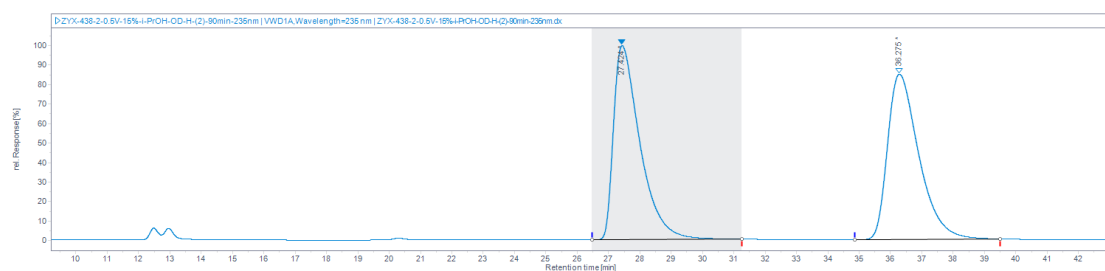

#### Injection Results

| # | RT (min) | Area%  | Height (mAU) | Start time (min) | End time (min) | S/N | Symmetry |
|---|----------|--------|--------------|------------------|----------------|-----|----------|
| 1 | 27.424   | 49.837 | 888.746      | 26.469           | 31.255         |     | 0.44789  |
| 2 | 36.275   | 50.163 | 740.401      | 34.853           | 39.500         |     | 0.57552  |

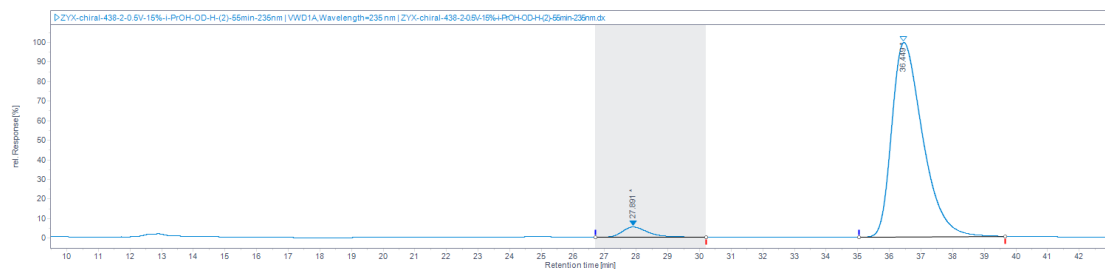

#### Injection Results

| # | RT (min) | Area%  | Height (mAU) | Start time (min) | End time (min) | S/N | Symmetry |
|---|----------|--------|--------------|------------------|----------------|-----|----------|
| 1 | 27.891   | 4.092  | 26.106       | 26.705           | 30.202         |     | 0.68119  |
| 2 | 36.449   | 95.908 | 502.120      | 35.041           | 39.668         |     | 0.60823  |

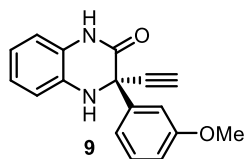

**(R)-3-ethynyl-3-(3-methoxyphenyl)-3,4-dihydroquinoxalin-2(1H)-one (9):** white solid; mp 63–64 °C; 24.5 mg, 88% yield; 92% *ee*;  $R_f = 0.3$  (PE:EA = 2:1);  $[\alpha]_D^{20} = -192.73$  ( $c = 2.20$ ,  $\text{CHCl}_3$ );  $^1\text{H NMR}$  (400 MHz,  $\text{CDCl}_3$ )  $\delta$  8.14 (s, 1H), 7.55–7.29 (m, 3H), 7.12–6.61 (m, 5H), 4.43 (s, 1H), 3.82 (s, 3H), 2.68 (s, 1H);  $^{13}\text{C NMR}$  (100 MHz,  $\text{CDCl}_3$ )  $\delta$  164.9, 159.7, 139.8, 132.2, 129.6, 125.4, 124.2, 120.8, 120.1, 115.5, 115.1, 114.8, 113.4, 100.1, 81.2, 61.4, 55.5; IR (neat,  $\text{cm}^{-1}$ ) 3271, 2923, 1686, 1606, 1506, 1488, 1312, 749; HRMS (ESI):  $m/z$ : calcd for  $\text{C}_{17}\text{H}_{14}\text{N}_2\text{O}_2\text{Na}$   $[\text{M}+\text{Na}]^+$ : 301.0953, found: 301.0956.

The *ee* was determined by HPLC analysis: CHIRALPAK ODH (4.6 mm i.d.  $\times$  250 mm); hexane/2-propanol = 85/15; flow rate 0.5 mL/min; 35 °C; 235 nm; retention time: 35.6 min (minor) and 64.3 min (major).



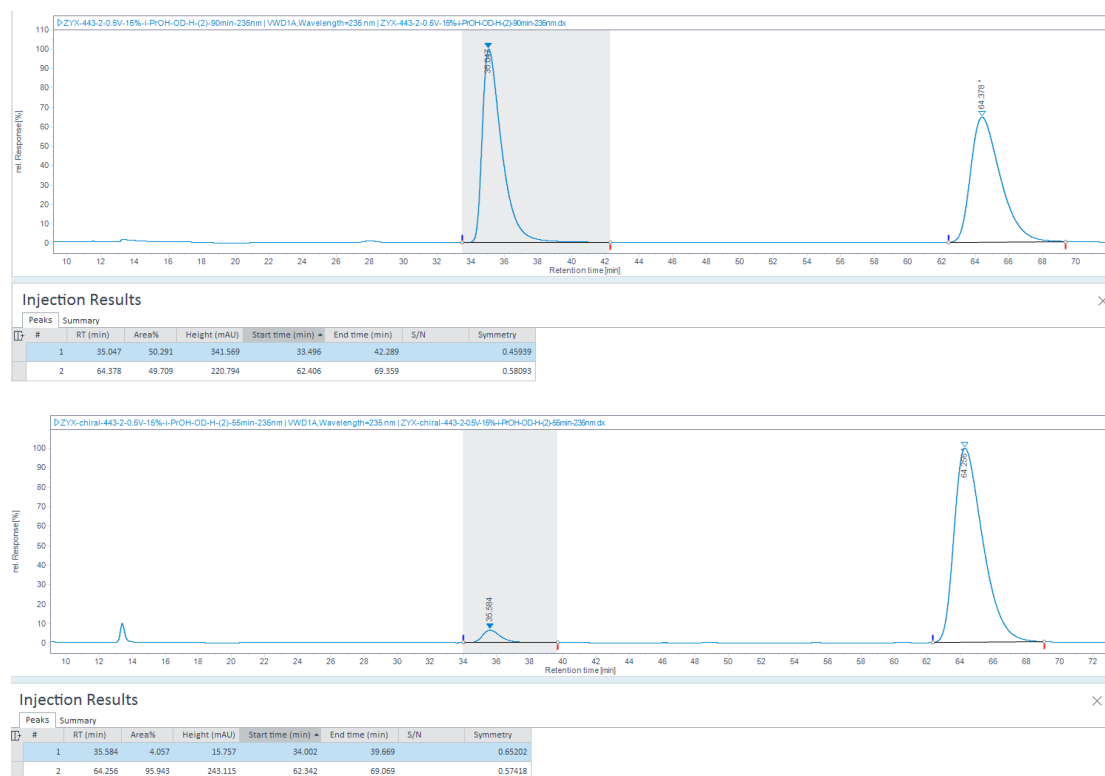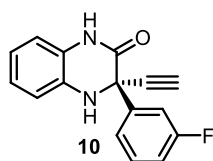

**(*R*)-3-ethynyl-3-(3-fluorophenyl)-3,4-dihydroquinoxalin-2(1H)-one (10):** yellow solid; mp 79-80 °C; 21.3 mg, 80% yield; 93% *ee*;  $R_f = 0.4$  (PE:EA = 2:1);  $[\alpha]_D^{20} = -230.64$  ( $c = 2.35$ ,  $\text{CHCl}_3$ );  $^1\text{H NMR}$  (400 MHz,  $\text{CDCl}_3$ )  $\delta$  8.48 (s, 1H), 7.61 (d,  $J = 7.9$  Hz, 1H), 7.58-7.52 (m, 1H), 7.44-7.35 (m, 1H), 7.09 (td,  $J = 8.3, 2.1$  Hz, 1H), 6.99 (td,  $J = 7.7, 1.1$  Hz, 1H), 6.88 (td,  $J = 7.6, 1.0$  Hz, 1H), 6.84-6.73 (m, 2H), 4.42 (s, 1H), 2.70 (s, 1H);  $^{13}\text{C NMR}$  (100 MHz,  $\text{CDCl}_3$ )  $\delta$  164.7, 162.8 (d,  $J = 247.5$  Hz), 140.8 (d,  $J = 7.1$  Hz), 131.9, 130.1 (d,  $J = 8.1$  Hz), 125.3, 124.3, 123.6 (d,  $J = 3.0$  Hz), 121.0, 116.1 (d,  $J = 21.2$  Hz), 115.7, 115.4, 115.1, 80.8, 77.1, 61.1;  $^{19}\text{F NMR}$  (376 MHz,  $\text{CDCl}_3$ )  $\delta$  -112.33; IR (neat,  $\text{cm}^{-1}$ ) 3290, 2925, 1686, 1609, 1505, 1442, 1355, 1311, 748; HRMS (ESI):  $m/z$ : calcd for  $\text{C}_{16}\text{H}_{11}\text{N}_2\text{ONaF}$   $[\text{M}+\text{Na}]^+$ : 289.0753, found: 289.0754.

The *ee* was determined by HPLC analysis: CHIRALPAK ODH (4.6 mm i.d.  $\times$  250 mm); hexane/2-propanol = 85/15; flow rate 0.5 mL/min; 35 °C; 235 nm; retention time: 21.9 min (minor) and 35.3 min (major).

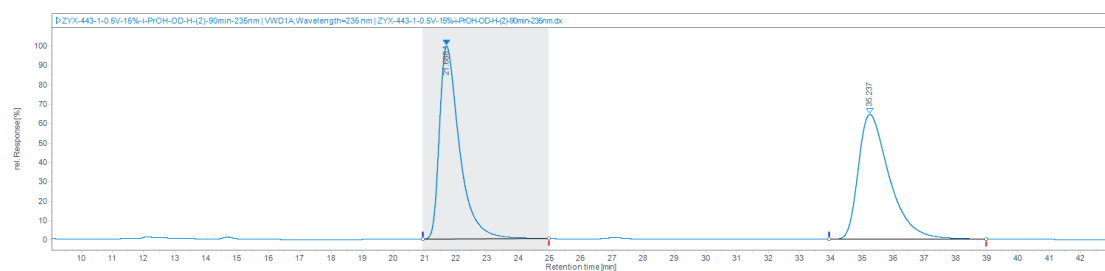

#### Injection Results

| # | RT (min) | Area%  | Height (mAU) | Start time (min) | End time (min) | S/N     | Symmetry |
|---|----------|--------|--------------|------------------|----------------|---------|----------|
| 1 | 21.688   | 49.977 | 775.594      | 20.932           | 24.966         | 0.51172 |          |
| 2 | 35.237   | 50.023 | 501.341      | 33.937           | 38.980         | 0.54946 |          |

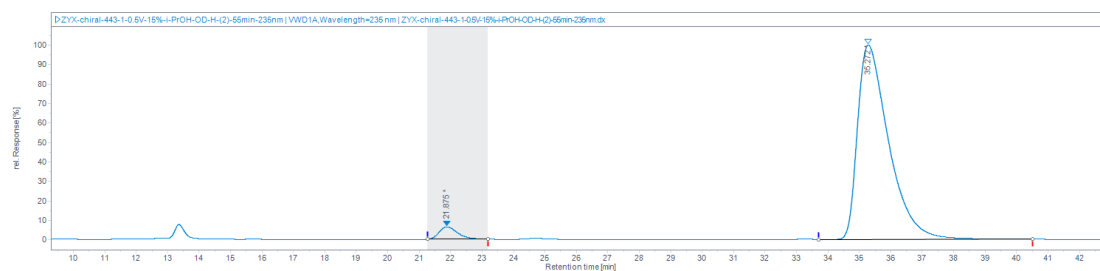

#### Injection Results

| # | RT (min) | Area%  | Height (mAU) | Start time (min) | End time (min) | S/N     | Symmetry |
|---|----------|--------|--------------|------------------|----------------|---------|----------|
| 1 | 21.875   | 3.649  | 59.044       | 21.258           | 23.185         | 0.68626 |          |
| 2 | 35.272   | 96.351 | 921.958      | 33.712           | 40.516         | 0.48805 |          |

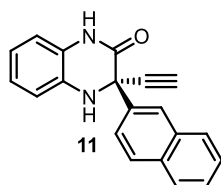

**(R)-3-ethynyl-3-(naphthalen-2-yl)-3,4-dihydroquinoxalin-2(1H)-one (11):** yellow solid; mp 142-143 °C; 25.3mg, 85% yield; 90% *ee*;  $R_f = 0.3$  (PE:EA = 2:1);  $[\alpha]_D^{20} = -202.44$  ( $c = 2.05$ ,  $\text{CHCl}_3$ );  $^1\text{H NMR}$  (400 MHz,  $\text{CDCl}_3$ )  $\delta$  8.57 (s, 1H), 8.33 (s, 1H), 8.00-7.76 (m, 4H), 7.59-7.45 (m, 2H), 7.04-6.91 (m, 1H), 6.91-6.67 (m, 3H), 4.49 (s, 1H), 2.76 (s, 1H);  $^{13}\text{C NMR}$  (100 MHz,  $\text{CDCl}_3$ )  $\delta$  165.2, 135.6, 133.6, 132.9, 132.2, 128.7, 128.5, 127.8, 127.2, 126.9, 126.5, 125.5, 125.4, 124.2, 120.8, 115.7, 115.0, 81.1, 77.0, 61.6; IR (neat,  $\text{cm}^{-1}$ ) 3287, 3057, 1686, 1607, 1505, 1354, 1311, 749; HRMS (ESI):  $m/z$ : calcd for  $\text{C}_{20}\text{H}_{14}\text{N}_2\text{ONa}$   $[\text{M}+\text{Na}]^+$ : 321.0998, found: 321.1013.

The *ee* was determined by HPLC analysis: CHIRALPAK ODH (4.6 mm i.d.  $\times$  250 mm); hexane/2-propanol = 85/15; flow rate 0.5 mL/min; 35 °C; 235 nm; retention time: 48.5 min (minor) and 54.6 min (major).

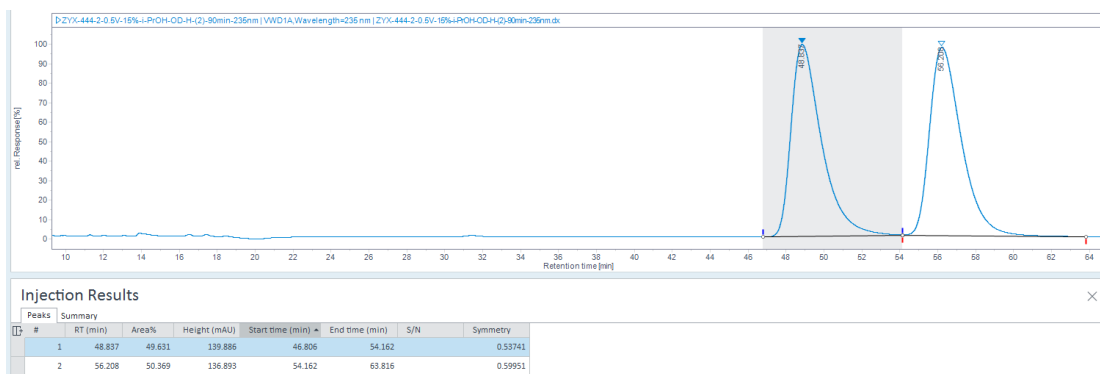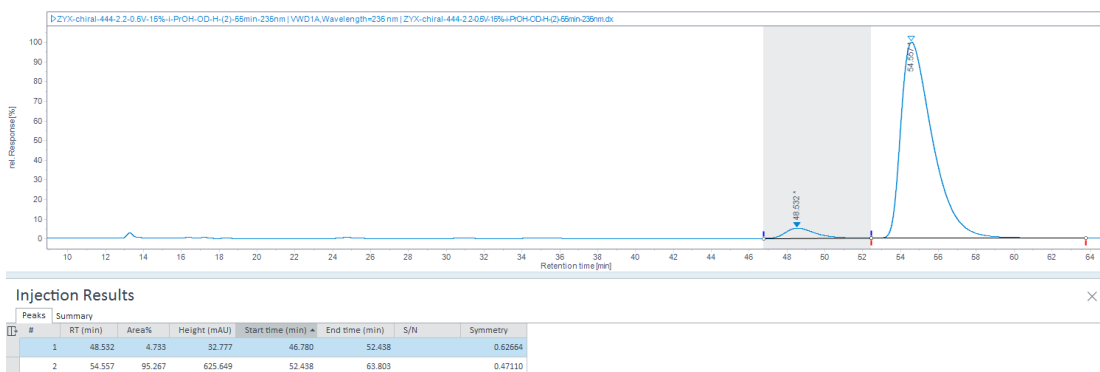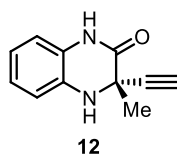

**(S)-3-ethynyl-3-methyl-3,4-dihydroquinoxalin-2(1H)-one (12):** yellow solid; mp 50-51 °C; 11.2 mg, 60% yield; 60% *ee*;  $R_f = 0.3$  (PE:EA = 2:1);  $[\alpha]_D^{20} = -231.00$  ( $c = 0.50$ ,  $\text{CHCl}_3$ );  $^1\text{H NMR}$  (400 MHz,  $\text{CDCl}_3$ )  $\delta$  7.85 (s, 1H), 6.96 (td,  $J = 7.6, 1.4$  Hz, 1H), 6.87 (td,  $J = 7.6, 1.3$  Hz, 1H), 6.79 (dd,  $J = 8.9, 4.4$  Hz, 2H), 4.16 (s, 1H), 2.36 (s, 1H), 1.80 (s, 3H);  $^{13}\text{C NMR}$  (100 MHz,  $\text{CDCl}_3$ ) one carbon signal was overlapped  $\delta$  165.5, 132.5, 125.9, 124.1, 120.9, 115.4, 115.2, 73.3, 53.2, 25.1; IR (neat,  $\text{cm}^{-1}$ ) 3325, 3270, 1664, 1604, 1507, 1388, 1314, 1146, 746, 663; HRMS (ESI):  $m/z$ : calcd for  $\text{C}_{11}\text{H}_{11}\text{N}_2\text{O}$   $[\text{M}+\text{H}]^+$ : 187.0871, found: 187.0874.

The *ee* was determined by HPLC analysis: CHIRALPAK ADH (4.6 mm i.d.  $\times$  250 mm); hexane/2-propanol = 90/10; flow rate 1.0 mL/min; 35 °C; 250 nm; retention time: 19.2 min (minor) and 37.4 min (major).

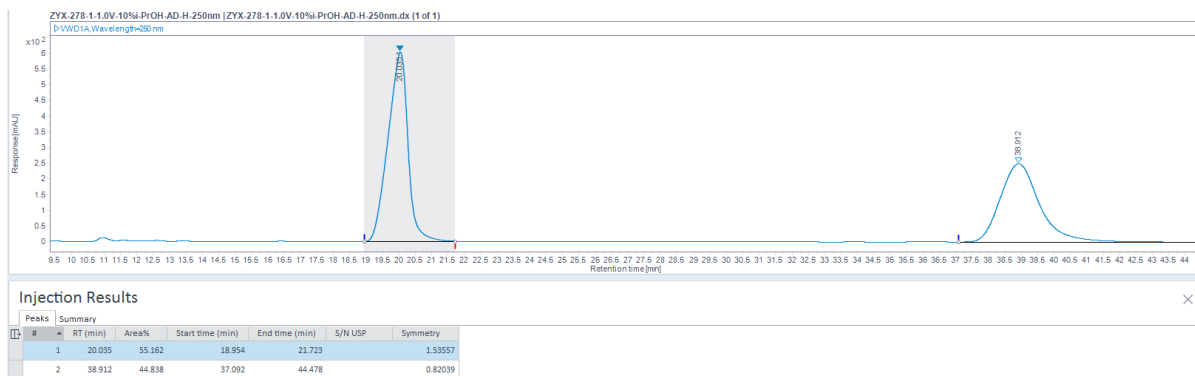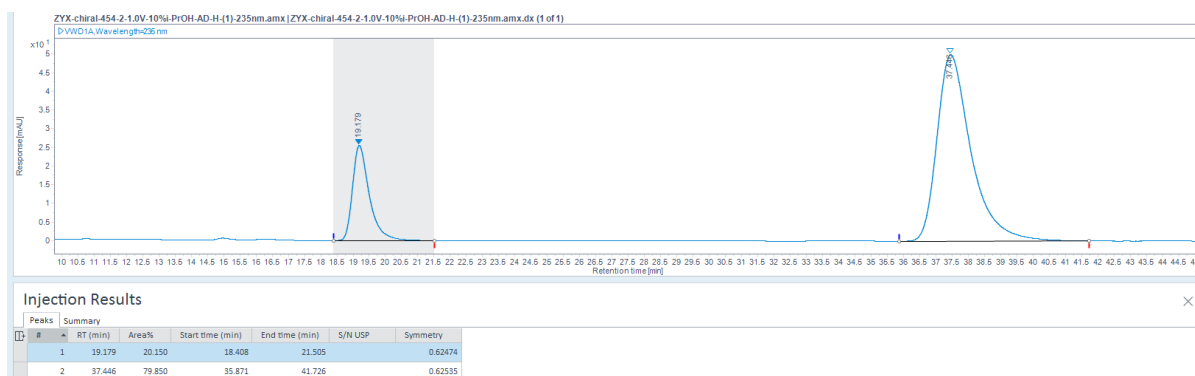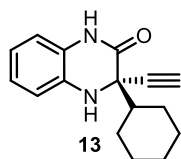

**(S)-3-cyclohexyl-3-ethynyl-3,4-dihydroquinoxalin-2(1H)-one (13):** yellow solid; mp 138-139 °C; 17.8 mg, 70% yield; 30% *ee*;  $R_f = 0.3$  (PE:EA = 2:1);  $[\alpha]_D^{20} = -26.00$  ( $c = 0.50$ ,  $\text{CHCl}_3$ );  $^1\text{H NMR}$  (400 MHz,  $\text{CDCl}_3$ )  $\delta$  8.62-8.42 (m, 1H), 6.97-6.86 (m, 1H), 6.86-6.66 (m, 3H), 4.10 (s, 1H), 2.47 (s, 1H), 2.22-2.03 (m, 2H), 1.89-1.66 (m, 4H), 1.34-1.15 (m, 5H).;  $^{13}\text{C NMR}$  (100 MHz,  $\text{CDCl}_3$ )  $\delta$  165.4, 131.9, 124.9, 124.2, 120.1, 115.2, 114.7, 81.7, 74.8, 61.3, 43.4, 27.2, 26.9, 26.5, 26.3, 26.2; IR (neat,  $\text{cm}^{-1}$ ) 3279, 2929, 2853, 1681, 1607, 1505, 1449, 1362, 1313, 744; HRMS (ESI):  $m/z$ : calcd for  $\text{C}_{16}\text{H}_{18}\text{N}_2\text{ONa}$   $[\text{M}+\text{Na}]^+$ : 277.1317, found: 277.1322.

The *ee* was determined by HPLC analysis: CHIRALPAK ASH (4.6 mm i.d.  $\times$  250 mm); hexane/2-propanol = 97/3; flow rate 1.5 mL/min; 35 °C; 235 nm; retention time: 37.1 min (major) and 48.1 min (minor).

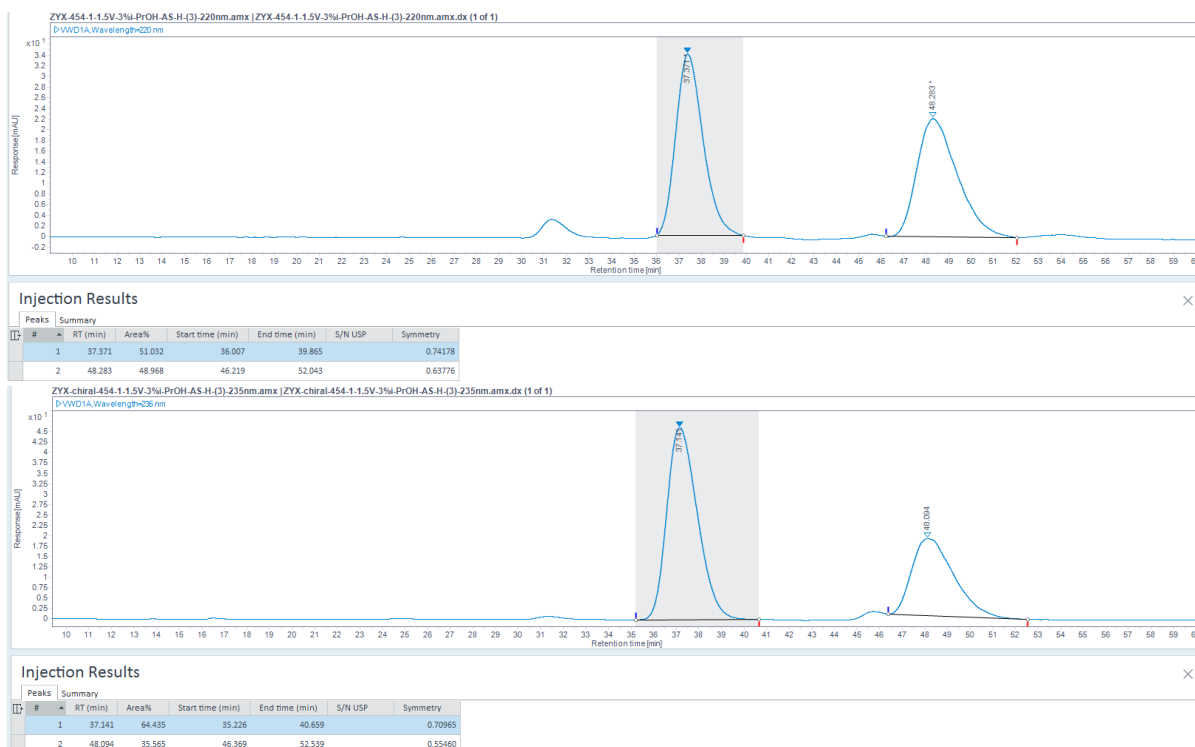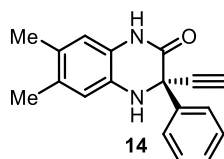

**(R)-3-ethynyl-6,7-dimethyl-3-phenyl-3,4-dihydroquinoxalin-2(1H)-one (14):**

white solid; mp 60-61 °C; 16.6 mg, 60% yield; 74% *ee*;  $R_f = 0.3$  (PE:EA = 2:1);  $[\alpha]_D^{20} = -144.76$  ( $c = 1.05$ ,  $\text{CHCl}_3$ );  $^1\text{H NMR}$  (400 MHz,  $\text{CDCl}_3$ )  $\delta$  8.53 (s, 1H), 7.86-7.77 (m, 2H), 7.46-7.36 (m, 3H), 6.56 (s, 2H), 4.27 (s, 1H), 2.68 (s, 1H), 2.19 (s, 3H), 2.16 (s, 3H);  $^{13}\text{C NMR}$  (100 MHz,  $\text{CDCl}_3$ )  $\delta$  165.3, 138.6, 132.3, 129.9, 129.0, 128.8, 128.5, 127.8, 123.2, 116.8, 116.3, 81.5, 76.5, 61.6, 19.5, 19.1; IR (neat,  $\text{cm}^{-1}$ ) 3276, 2944, 1685, 1516, 1447, 1382, 1348, 1020, 871, 698; HRMS (ESI):  $m/z$ : calcd for  $\text{C}_{18}\text{H}_{16}\text{N}_2\text{ONa}$   $[\text{M}+\text{Na}]^+$ : 299.1160, found: 299.1164.

The *ee* was determined by HPLC analysis: CHIRALPAK ODH (4.6 mm i.d.  $\times$  250 mm); hexane/2-propanol = 85/15; flow rate 0.5 mL/min; 35 °C; 235 nm; retention time: 30.0 min (minor) and 34.9 min (major).

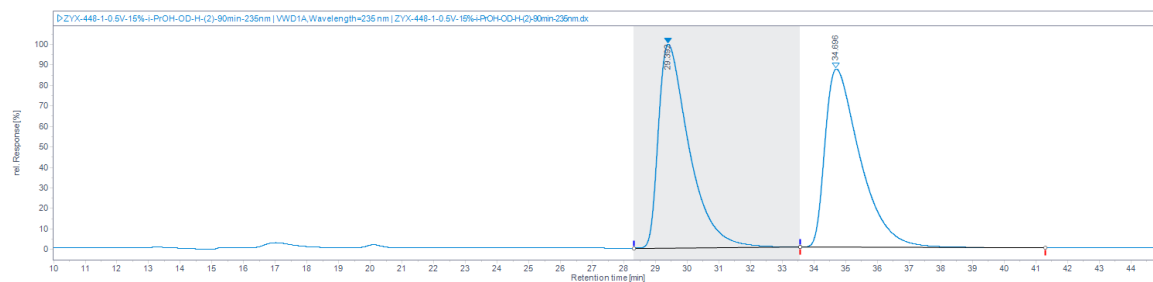

#### Injection Results

| Peaks Summary |          |        |              |                  |                |     |          |
|---------------|----------|--------|--------------|------------------|----------------|-----|----------|
| #             | RT (min) | Area%  | Height (mAU) | Start time (min) | End time (min) | S/N | Symmetry |
| 1             | 29.392   | 49.921 | 282.644      | 28.326           | 33.571         |     | 0.43960  |
| 2             | 34.696   | 50.079 | 247.814      | 33.573           | 41.303         |     | 0.44240  |

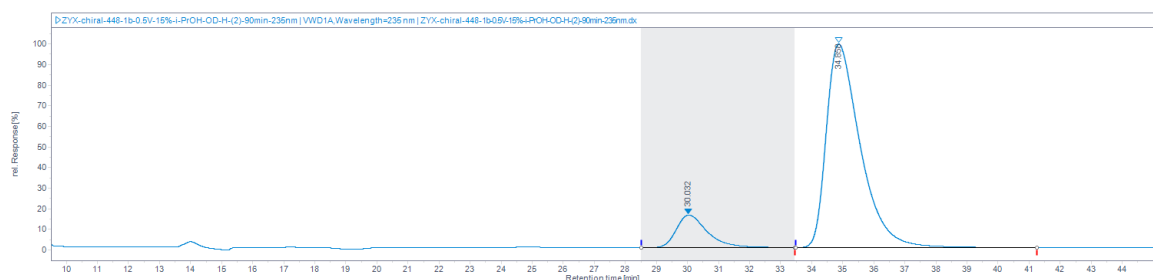

#### Injection Results

| Peaks Summary |          |        |              |                  |                |     |          |
|---------------|----------|--------|--------------|------------------|----------------|-----|----------|
| #             | RT (min) | Area%  | Height (mAU) | Start time (min) | End time (min) | S/N | Symmetry |
| 1             | 30.032   | 12.936 | 13.159       | 28.504           | 33.469         |     | 0.63440  |
| 2             | 34.858   | 87.064 | 81.897       | 33.471           | 41.248         |     | 0.53574  |

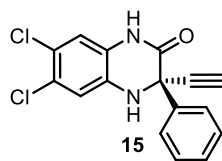

#### **(R)-6,7-dichloro-3-ethynyl-3-phenyl-3,4-dihydroquinoxalin-2(1H)-one (15):**

yellow solid; mp 181-182 °C; 25.3 mg, 81% yield; 96% *ee*;  $R_f = 0.4$  (PE:EA = 2:1);  $[\alpha]_D^{20} = -185.33$  ( $c = 1.50$ ,  $\text{CHCl}_3$ );  $^1\text{H NMR}$  (400 MHz,  $\text{CDCl}_3$ )  $\delta$  8.73 (s, 1H), 7.84-7.68 (m, 2H), 7.51-7.36 (m, 3H), 6.86 (s, 2H), 4.49 (s, 1H), 2.74 (s, 1H);  $^{13}\text{C NMR}$  (100 MHz,  $\text{CDCl}_3$ ) one carbon signal was overlapped  $\delta$  165.0, 137.5, 131.9, 129.5, 128.8, 127.7, 127.1, 125.2, 123.5, 116.9, 116.2, 80.4, 61.1; IR (neat,  $\text{cm}^{-1}$ ) 3291, 2924, 1688, 1498, 1355, 1261, 1211, 868, 697; HRMS (ESI):  $m/z$ : calcd for  $\text{C}_{16}\text{H}_{10}\text{N}_2\text{O}_2\text{Na}^{35}\text{Cl}_2$   $[\text{M}+\text{Na}]^+$ : 339.0068, found: 339.0071.

The *ee* was determined by HPLC analysis: CHIRALPAK ODH (4.6 mm i.d.  $\times$  250 mm); hexane/2-propanol = 85/15; flow rate 0.5 mL/min; 35 °C; 235 nm; retention time: 22.8 min (minor) and 28.2 min (major).

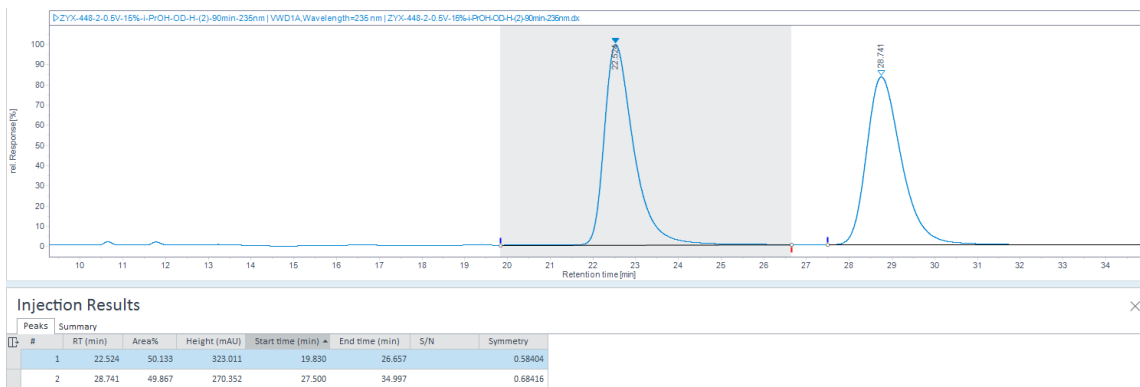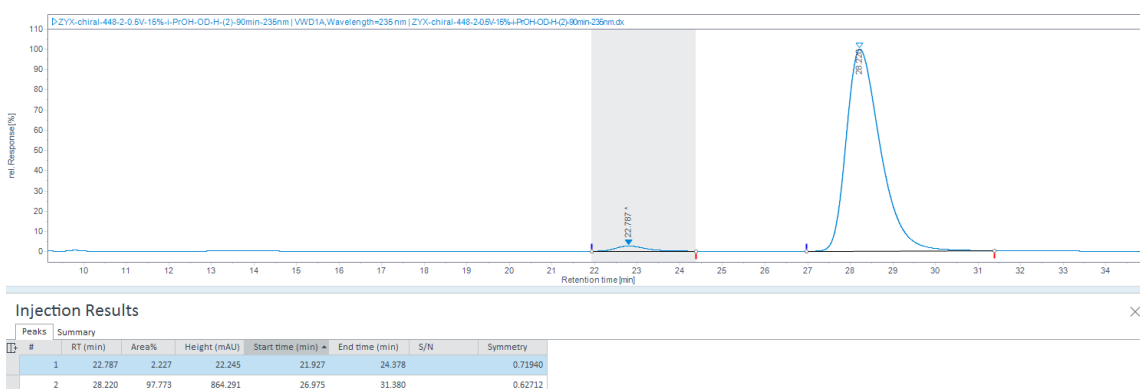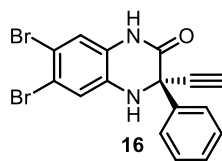

**(R)-6,7-dibromo-3-ethynyl-3-phenyl-3,4-dihydroquinoxalin-2(1H)-one (16):**

yellow solid; mp 190-191 °C; 32.3 mg, 80% yield; 97% *ee*;  $R_f = 0.4$  (PE:EA = 2:1);  $[\alpha]_D^{20} = -172.00$  ( $c = 0.75$ ,  $\text{CHCl}_3$ );  $^1\text{H NMR}$  (400 MHz,  $\text{CDCl}_3$ )  $\delta$  8.24 (s, 1H), 7.86-7.69 (m, 2H), 7.53-7.35 (m, 3H), 7.04 (d,  $J = 9.5$  Hz, 2H), 4.49 (s, 1H), 2.74 (s, 1H);  $^{13}\text{C NMR}$  (100 MHz,  $\text{CDCl}_3$ ) one carbon signal was overlapped  $\delta$  164.6, 137.4, 132.6, 129.5, 128.8, 127.7, 125.9, 119.6, 119.3, 118.6, 114.6, 80.4, 61.1; IR (neat,  $\text{cm}^{-1}$ ) 3293, 2924, 2853, 1689, 1605, 1494, 1351, 1287, 757; HRMS (ESI):  $m/z$ : calcd for  $\text{C}_{16}\text{H}_{10}\text{N}_2\text{ONa}^{79}\text{Br}_2$   $[\text{M}+\text{Na}]^+$ : 426.9058, found: 426.9057.

The *ee* was determined by HPLC analysis: CHIRALPAK ODH (4.6 mm i.d.  $\times$  250 mm); hexane/2-propanol = 85/15; flow rate 0.5 mL/min; 35 °C; 235 nm; retention time: 25.3 min (minor) and 31.0 min (major).

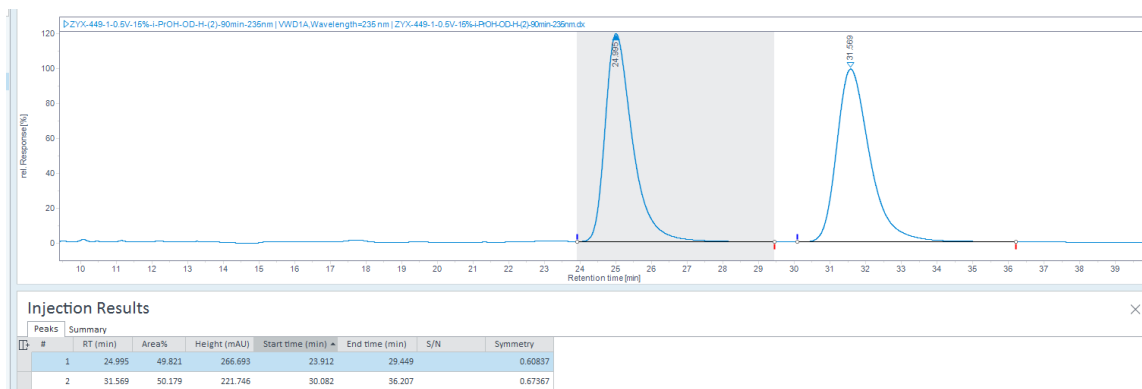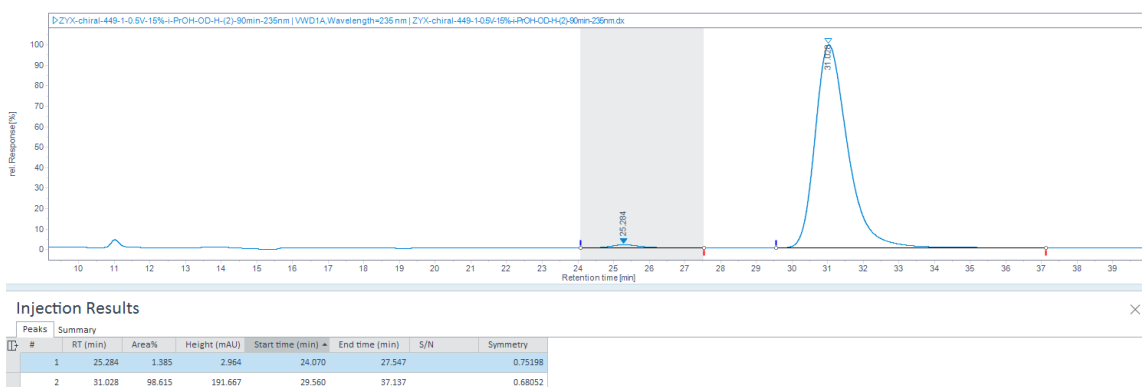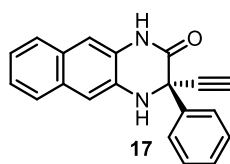

**(R)-3-ethynyl-3-phenyl-3,4-dihydrobenzo[g]quinoxalin-2(1H)-one (17):** yellow solid; mp 95-96 °C; 26.5 mg, 89% yield; 95% *ee*;  $R_f = 0.4$  (PE:EA = 2:1);  $[\alpha]_D^{20} = -94.67$  ( $c = 1.50$ ,  $\text{CHCl}_3$ );  $^1\text{H NMR}$  (400 MHz,  $\text{CDCl}_3$ )  $\delta$  8.36 (s, 1H), 7.92-7.81 (m, 2H), 7.72-7.60 (m, 2H), 7.50-7.28 (m, 5H), 7.17 (d,  $J = 15.1$  Hz, 2H), 4.67 (s, 1H), 2.67 (s, 1H);  $^{13}\text{C NMR}$  (100 MHz,  $\text{CDCl}_3$ )  $\delta$  165.8, 138.1, 132.4, 131.3, 129.3, 129.1, 128.7, 127.7, 127.0, 126.7, 126.2, 125.5, 124.3, 111.8, 110.3, 81.1, 76.8, 61.6; IR (neat,  $\text{cm}^{-1}$ ) 3268, 1687, 1530, 1483, 1448, 1334, 846, 745; HRMS (ESI):  $m/z$ : calcd for  $\text{C}_{16}\text{H}_{12}\text{N}_2\text{O}_2\text{Na}$   $[\text{M}+\text{Na}]^+$ : 321.0998, found: 321.0997.

The *ee* was determined by HPLC analysis: CHIRALPAK OZH (4.6 mm i.d.  $\times$  250 mm); hexane/2-propanol = 85/15; flow rate 0.8 mL/min; 35 °C; 235 nm; retention time: 32.7 min (minor) and 50.0 min (major).



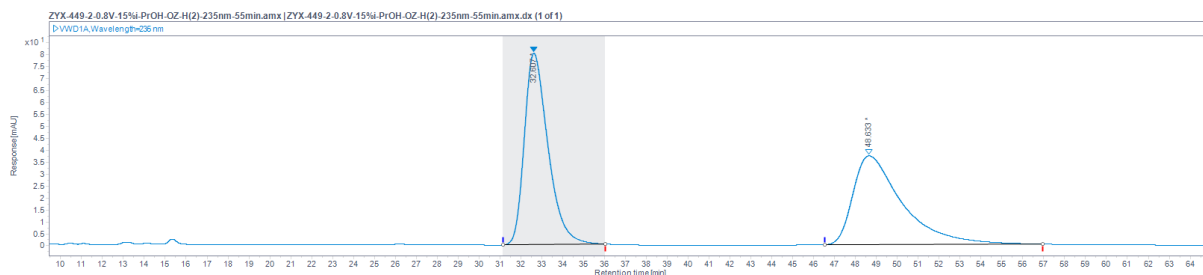

#### Injection Results

| # | RT (min) | Area%  | Start time (min) | End time (min) | S/N USP | Symmetry |
|---|----------|--------|------------------|----------------|---------|----------|
| 1 | 32.607   | 50.804 | 31.142           | 36.026         | 0.64039 |          |
| 2 | 48.633   | 49.196 | 46.546           | 56.940         | 0.45347 |          |

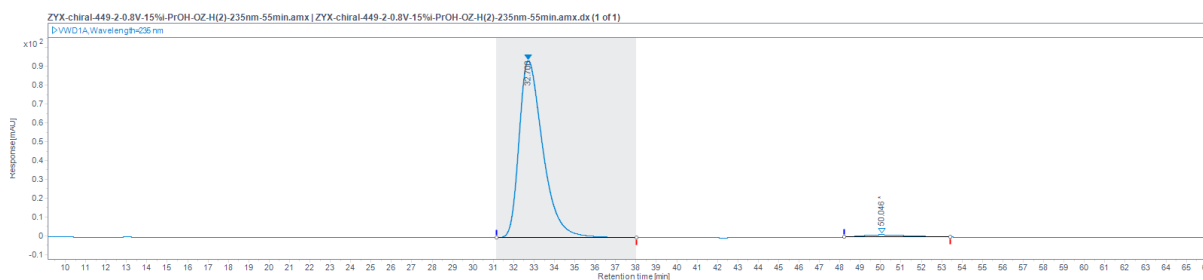

#### Injection Results

| # | RT (min) | Area%  | Start time (min) | End time (min) | S/N USP | Symmetry |
|---|----------|--------|------------------|----------------|---------|----------|
| 1 | 32.700   | 97.539 | 31.171           | 38.026         | 0.59957 |          |
| 2 | 50.046   | 2.461  | 48.231           | 53.435         | 0.66030 |          |

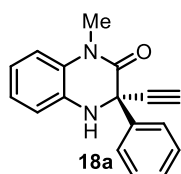

**(R)-3-ethynyl-1-methyl-3-phenyl-3,4-dihydroquinoxalin-2(1H)-one (18a):** white solid; mp 128-129 °C; 15.7 mg, 60% yield; 96% *ee*;  $R_f = 0.4$  (PE:EA = 2:1);  $[\alpha]_D^{20} = -282.70$  ( $c = 1.85$ ,  $\text{CHCl}_3$ );  $^1\text{H NMR}$  (400 MHz,  $\text{CDCl}_3$ )  $\delta$  7.80 (d,  $J = 6.7$  Hz, 2H), 7.49-7.33 (m, 3H), 7.12-6.92 (m, 3H), 6.91-6.72 (m, 1H), 4.45 (s, 1H), 3.44 (s, 3H), 2.61 (s, 1H);  $^{13}\text{C NMR}$  (100 MHz,  $\text{CDCl}_3$ )  $\delta$  164.6, 138.8, 133.6, 129.0, 130.0, 128.5, 127.7, 123.9, 120.9, 115.2, 114.9, 81.4, 76.3, 61.5, 30.3; IR (neat,  $\text{cm}^{-1}$ ) 3297, 1669, 1600, 1507, 1374, 1306, 1145, 748; HRMS (ESI):  $m/z$ : calcd for  $\text{C}_{17}\text{H}_{14}\text{N}_2\text{ONa}$   $[\text{M}+\text{Na}]^+$ : 285.1004, found: 285.1003.

The *ee* was determined by HPLC analysis: CHIRALPAK ODH (4.6 mm i.d.  $\times$  250 mm); hexane/2-propanol = 85/15; flow rate 0.5 mL/min; 35 °C; 235 nm; retention time: 25.2 min (minor) and 34.5 min (major).

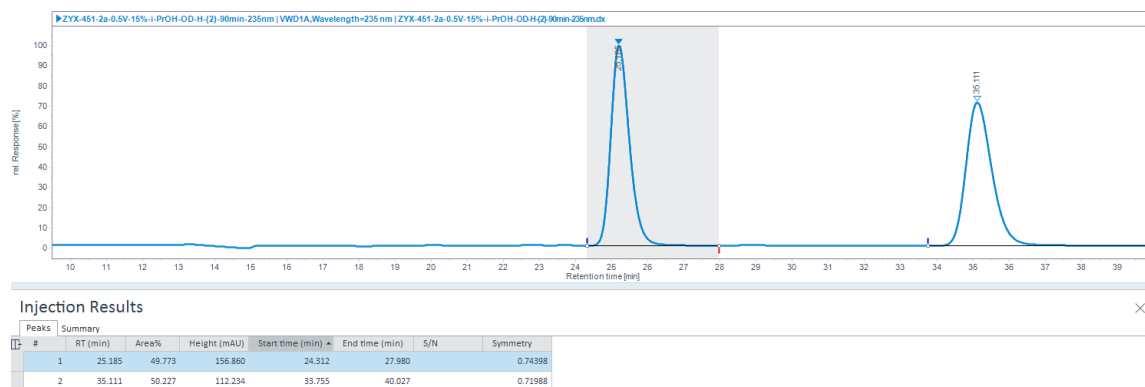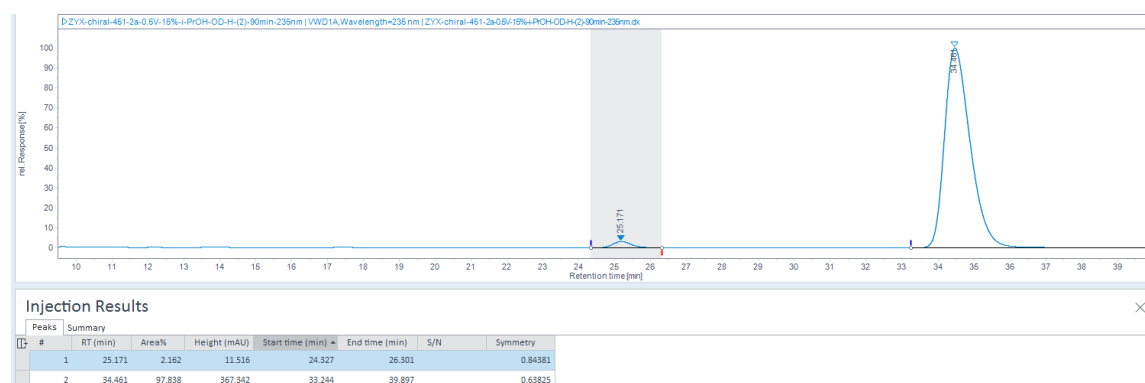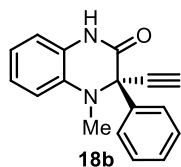

**(R)-3-ethynyl-4-methyl-3-phenyl-3,4-dihydroquinoxalin-2(1H)-one (18b):** white solid; mp 173-174 °C; 7.9 mg, 30% yield; 37% *ee*;  $R_f = 0.4$  (PE:EA = 2:1);  $[\alpha]_D^{20} = -96.00$  ( $c = 0.25$ ,  $\text{CHCl}_3$ );  $^1\text{H NMR}$  (400 MHz,  $\text{CDCl}_3$ )  $\delta$  8.48 (s, 1H), 7.77-7.67 (m, 2H), 7.46-7.35 (m, 3H), 7.10-7.02 (m, 1H), 6.90-6.72 (m, 3H), 2.72 (s, 1H), 2.63 (s, 3H);  $^{13}\text{C NMR}$  (100 MHz,  $\text{CDCl}_3$ )  $\delta$  165.5, 138.4, 134.8, 128.9, 128.7, 128.0, 125.3, 124.6, 120.1, 115.2, 113.7, 78.0, 78.0, 67.7, 33.5; IR (neat,  $\text{cm}^{-1}$ ) 3244, 1688, 1601, 1505, 1305, 1000, 747, 660, 588; HRMS (ESI):  $m/z$ : calcd for  $\text{C}_{17}\text{H}_{14}\text{N}_2\text{O}_2\text{Na}$   $[\text{M}+\text{Na}]^+$ : 285.1004, found: 285.1009.

The *ee* was determined by HPLC analysis: CHIRALPAK ODH (4.6 mm i.d.  $\times$  250 mm); hexane/2-propanol = 85/15; flow rate 0.5 mL/min; 35 °C; 235 nm; retention time: 20.0 min (minor) and 25.0 min (major).

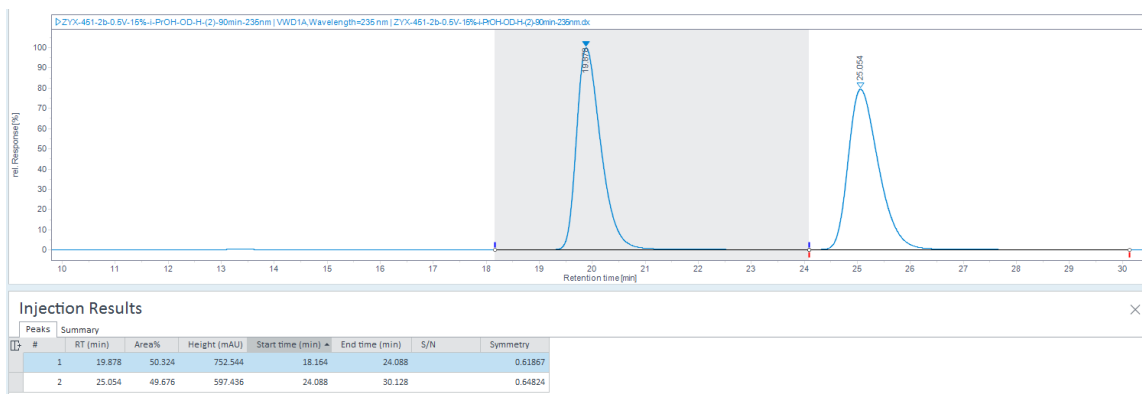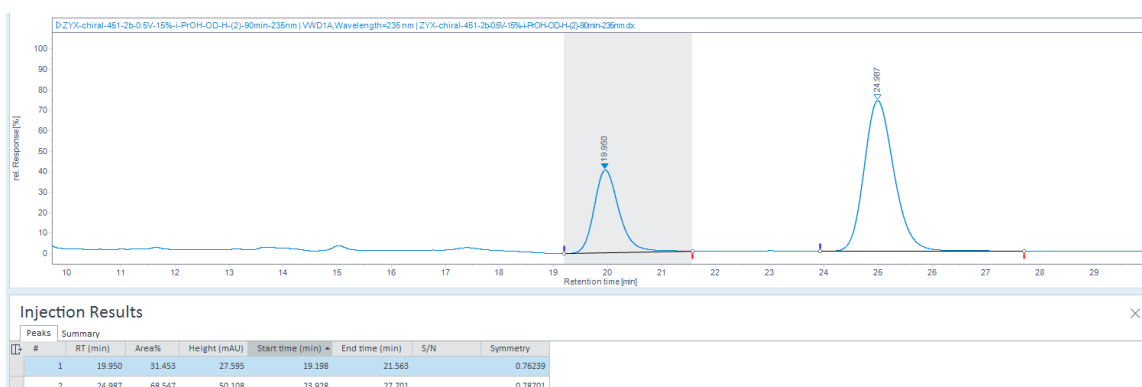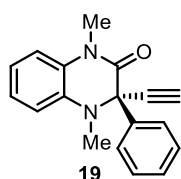

**(R)-3-ethynyl-1,4-dimethyl-3-phenyl-3,4-dihydroquinoxalin-2(1H)-one (19):**

yellow solid; mp 180-181 °C; 19.9 mg, 72% yield; 40% *ee*;  $R_f = 0.4$  (PE:EA = 2:1);  $[\alpha]_D^{20} = -81.90$  ( $c = 1.05$ ,  $\text{CHCl}_3$ );  $^1\text{H NMR}$  (400 MHz,  $\text{CDCl}_3$ )  $\delta$  7.74-7.68 (m, 2H), 7.45-7.34 (m, 3H), 7.16-7.10 (m, 1H), 7.07-6.96 (m, 2H), 6.90-6.84 (m, 1H), 3.46 (s, 3H), 2.64 (s, 1H), 2.62 (s, 3H);  $^{13}\text{C NMR}$  (100 MHz,  $\text{CDCl}_3$ )  $\delta$  165.2, 139.0, 136.2, 129.0, 128.7, 128.6, 128.0, 124.3, 120.2, 114.3, 113.8, 78.0, 77.6, 67.8, 33.8, 30.3; IR (neat,  $\text{cm}^{-1}$ ) 3276, 1675, 1506, 1376, 1302, 1158, 1134, 1049, 1008, 745; HRMS (ESI):  $m/z$ : calcd for  $\text{C}_{18}\text{H}_{16}\text{N}_2\text{ONa}$   $[\text{M}+\text{Na}]^+$ : 299.1160, found: 299.1166.

The *ee* was determined by HPLC analysis: CHIRALPAK ODH (4.6 mm i.d.  $\times$  250 mm); hexane/2-propanol = 85/15; flow rate 0.5 mL/min; 35 °C; 235 nm; retention time: 18.9 min (minor) and 20.9 min (major).

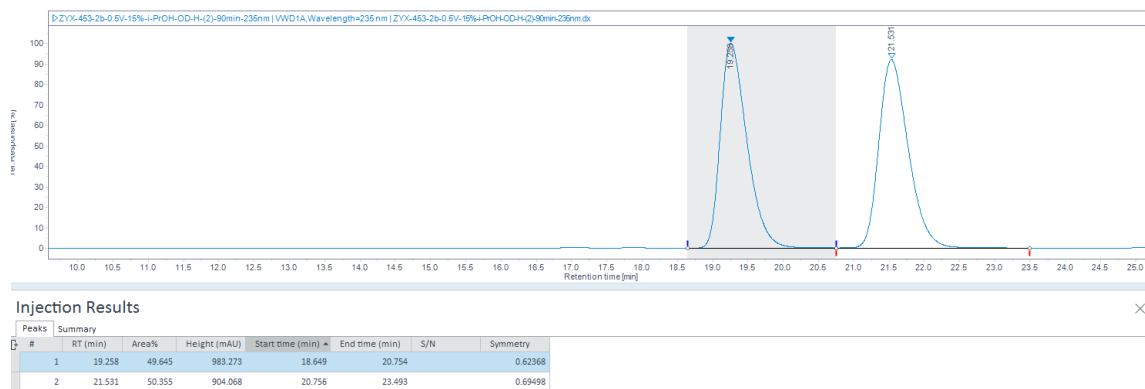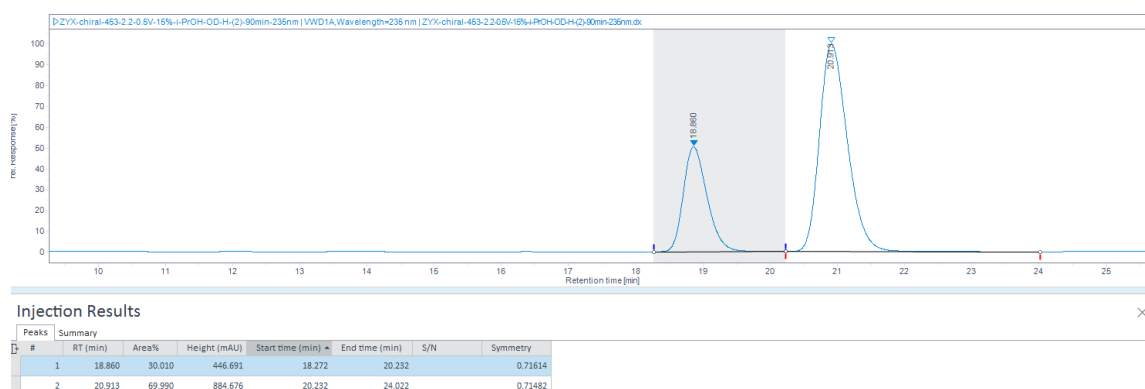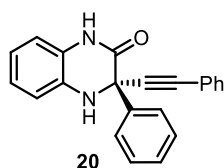

**(S)-3-phenyl-3-(phenylethynyl)-3,4-dihydroquinoxalin-2(1H)-one (20):** yellow solid; mp 154-155 °C; 24.3 mg, 75% yield; 94% *ee*;  $R_f = 0.4$  (PE:EA = 5:1);  $[\alpha]_D^{20} = -256.33$  ( $c = 3.00$ ,  $\text{CHCl}_3$ );  $^1\text{H NMR}$  (400 MHz,  $\text{CDCl}_3$ )  $\delta$  8.75 (s, 1H), 7.99-7.81 (m, 2H), 7.47-7.21 (m, 8H), 6.99-6.89 (m, 1H), 6.87-6.71 (m, 3H), 4.49 (s, 1H);  $^{13}\text{C NMR}$  (100 MHz,  $\text{CDCl}_3$ )  $\delta$  165.8, 139.0, 132.6, 132.0, 129.0, 128.9, 128.5, 128.3, 128.0, 125.6, 124.0, 122.0, 120.6, 115.7, 115.0, 88.7, 86.5, 62.0; IR (neat,  $\text{cm}^{-1}$ ) 3241, 3078, 1685, 1607, 1505, 1447, 1350, 1310, 752, 691; HRMS (ESI):  $m/z$ : calcd for  $\text{C}_{22}\text{H}_{16}\text{N}_2\text{ONa}$   $[\text{M}+\text{Na}]^+$ : 347.1160, found: 347.1162.

The *ee* was determined by HPLC analysis: CHIRALPAK ODH (4.6 mm i.d.  $\times$  250 mm); hexane/2-propanol = 85/15; flow rate 0.5 mL/min; 35 °C; 235 nm; retention time: 20.7 min (major) and 25.8 min (minor).

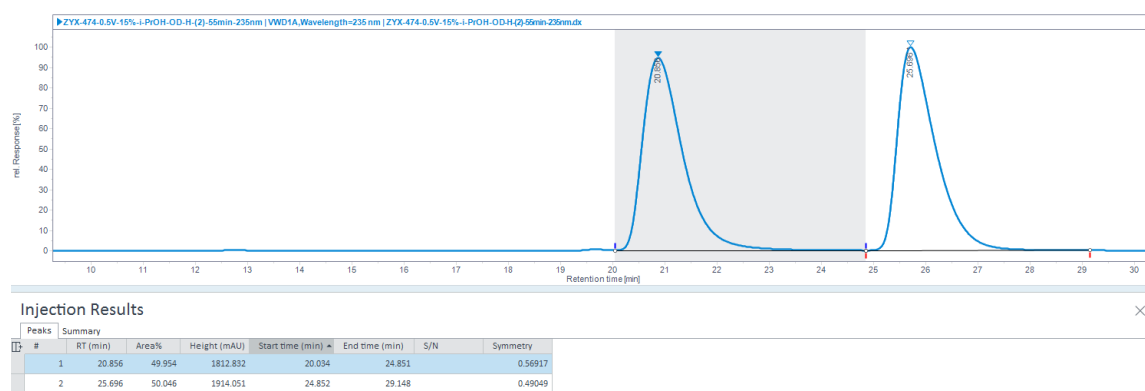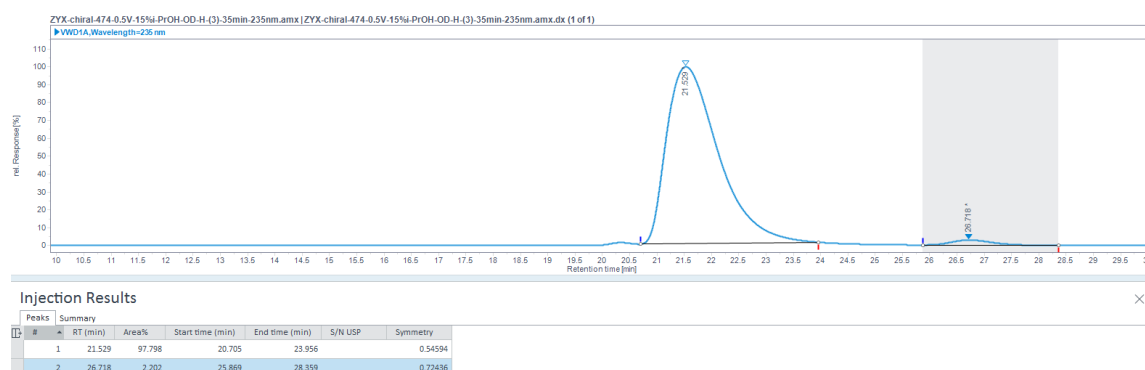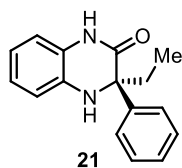

**(R)-3-ethyl-3-phenyl-3,4-dihydroquinoxalin-2(1H)-one (21):** yellow solid; mp 130-131 °C; 20.2 mg, 80% yield; 94% *ee*;  $R_f = 0.4$  (PE:EA = 5:1);  $[\alpha]_D^{20} = -165.71$  ( $c = 1.05$ ,  $\text{CHCl}_3$ );  $^1\text{H NMR}$  (400 MHz,  $\text{CDCl}_3$ )  $\delta$  8.00 (s, 1H), 7.44 (m, 2H), 7.30-7.21 (m, 3H), 6.97-6.82 (m, 2H), 6.70 (m, 1H), 6.59 (m, 1H), 4.34 (s, 1H), 2.46 (dq,  $J = 14.5, 7.3$  Hz, 1H), 1.97 (dq,  $J = 14.7, 7.4$  Hz, 1H), 1.01 (t,  $J = 7.4$  Hz, 3H);  $^{13}\text{C NMR}$  (100 MHz,  $\text{CDCl}_3$ )  $\delta$  168.3, 141.9, 133.3, 128.6, 127.7, 125.8, 125.0, 124.1, 119.3, 115.1, 114.1, 64.9, 33.0, 8.6; IR (neat,  $\text{cm}^{-1}$ ) 3374, 2992, 1676, 1503, 1441, 1364, 1311, 746, 702; HRMS (ESI):  $m/z$ : calcd for  $\text{C}_{16}\text{H}_{16}\text{N}_2\text{ONa}$   $[\text{M}+\text{Na}]^+$ : 275.1160, found: 275.1162.

The *ee* was determined by HPLC analysis: CHIRALPAK ODH (4.6 mm i.d.  $\times$  250 mm); hexane/2-propanol = 85/15; flow rate 0.5 mL/min; 35 °C; 235 nm; retention time: 17.6 min (minor) and 20.8 min (major).

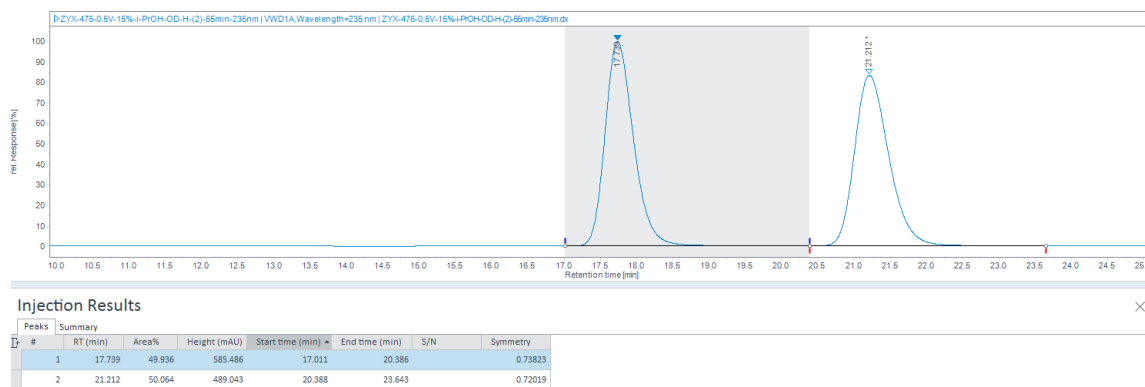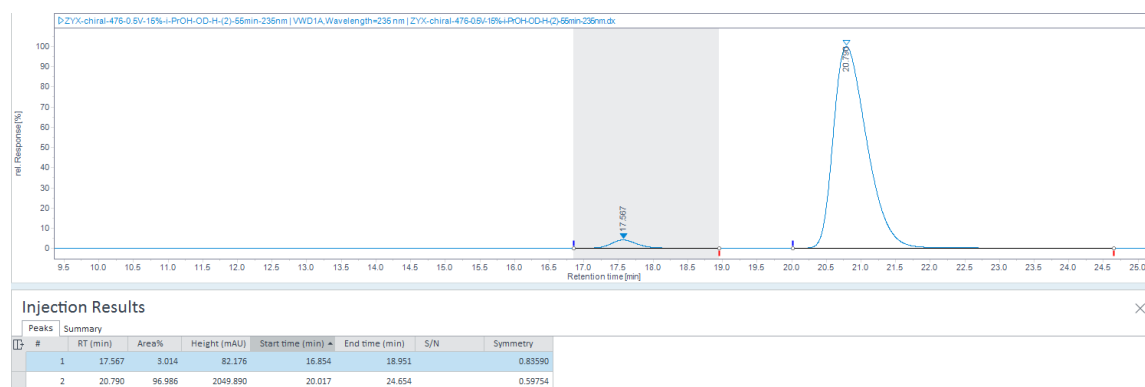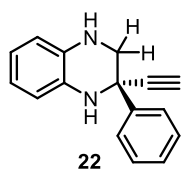

**(R)-2-ethynyl-2-phenyl-1,2,3,4-tetrahydroquinoxaline (22):** yellow solid; mp 114-115 °C; 17.1 mg, 73% yield; 97% *ee*;  $R_f = 0.4$  (PE:EA = 5:1);  $[\alpha]_D^{20} = -225.00$  ( $c = 0.40$ ,  $\text{CHCl}_3$ );  $^1\text{H NMR}$  (400 MHz,  $\text{CDCl}_3$ )  $\delta$  7.92-7.60 (m, 2H), 7.52-7.31 (m, 3H), 6.84-6.46 (m, 4H), 4.11 (s, 2H), 3.38 (dd,  $J = 30.1, 11.8$  Hz, 2H), 2.54 (s, 1H);  $^{13}\text{C NMR}$  (100 MHz,  $\text{CDCl}_3$ )  $\delta$  141.3, 133.2, 131.7, 128.7, 128.4, 126.6, 119.9, 119.9, 116.6, 115.8, 84.9, 73.3, 55.2, 53.1; IR (neat,  $\text{cm}^{-1}$ ) 3349, 3285, 3051, 2991, 2854, 1598, 1504, 1298, 1128, 746, 693, 651; HRMS (ESI):  $m/z$ : calcd for  $\text{C}_{16}\text{H}_{15}\text{N}_2$   $[\text{M}+\text{H}]^+$ : 234.1157, found: 234.1158.

The *ee* was determined by HPLC analysis: CHIRALPAK ODH (4.6 mm i.d.  $\times$  250 mm); hexane/2-propanol = 85/15; flow rate 0.5 mL/min; 35 °C; 235 nm; retention time: 20.5 min (minor) and 21.9 min (major).

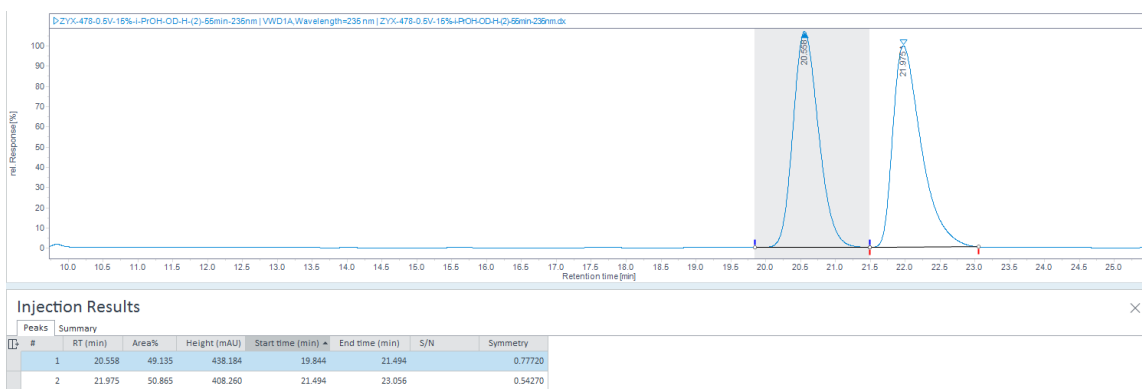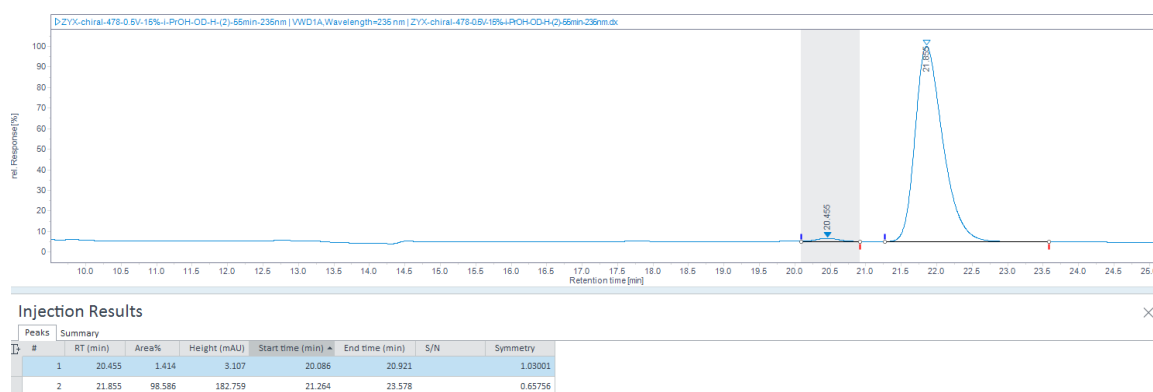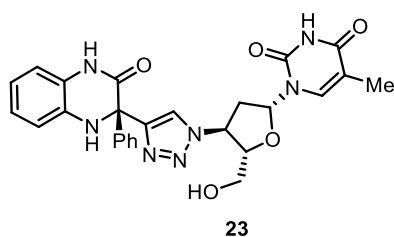

**1-((2*R*,4*S*,5*S*)-5-(hydroxymethyl)-4-(4-((*S*)-3-oxo-2-phenyl-1,2,3,4-tetrahydroquinoxalin-2-yl)-1*H*-1,2,3-triazol-1-yl)tetrahydrofuran-2-yl)-5-methyldihydropyrimidine-2,4(1*H*,3*H*)-dione (23):** white solid; mp 146-147 °C; 47.9 mg, 93% yield; 95% *ee*;  $R_f = 0.3$  (DCM:MeOH = 25:1);  $[\alpha]_D^{20} = -43.08$  ( $c = 0.65$ , CHCl<sub>3</sub>); <sup>1</sup>H NMR (400 MHz, DMSO)  $\delta$  11.35 (s, 1H), 10.63 (s, 1H), 8.10 (d,  $J = 4.7$  Hz, 1H), 7.79 (s, 1H), 7.47 (d,  $J = 7.7$  Hz, 2H), 7.40-7.11 (m, 4H), 6.99 (d,  $J = 7.8$  Hz, 1H), 6.78 (t,  $J = 7.6$  Hz, 1H), 6.66 (d,  $J = 7.4$  Hz, 1H), 6.58 (t,  $J = 7.5$  Hz, 1H), 6.41 (t,  $J = 6.5$  Hz, 1H), 5.36 (dt,  $J = 11.3, 5.6$  Hz, 1H), 5.27 (q,  $J = 5.2$  Hz, 1H), 4.20 (d,  $J = 4.3$  Hz, 1H), 3.75-3.51 (m, 2H), 2.77-2.55 (m, 2H), 1.80 (s, 3H); <sup>13</sup>C NMR (100 MHz, DMSO)  $\delta$  165.5, 163.8, 150.5, 149.1, 141.0, 136.3, 133.5, 128.1, 127.5, 126.8, 125.6, 123.8, 123.0, 118.2, 114.6, 114.3, 109.6, 84.4, 83.8, 62.8, 60.7, 59.1, 37.1, 12.3; IR (neat, cm<sup>-1</sup>) 3244, 2106, 1675, 1505, 1445, 1312, 1269, 1100, 1056, 750, 700; HRMS (ESI):  $m/z$ : calcd for C<sub>26</sub>H<sub>25</sub>N<sub>7</sub>O<sub>5</sub>Na [M+Na]<sup>+</sup>: 538.1815, found: 538.1810.

The *ee* was determined by HPLC analysis: CHIRALPAK IGH (4.6 mm i.d. × 250 mm); hexane/2-propanol = 60/40; flow rate 1.0 mL/min; 35 °C; 235 nm; retention time: 62.5 min (minor) and 74.8 min (major).

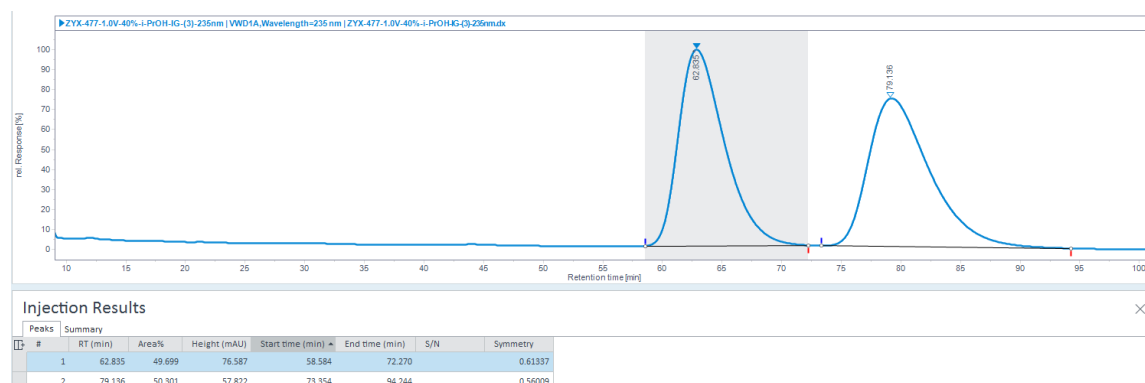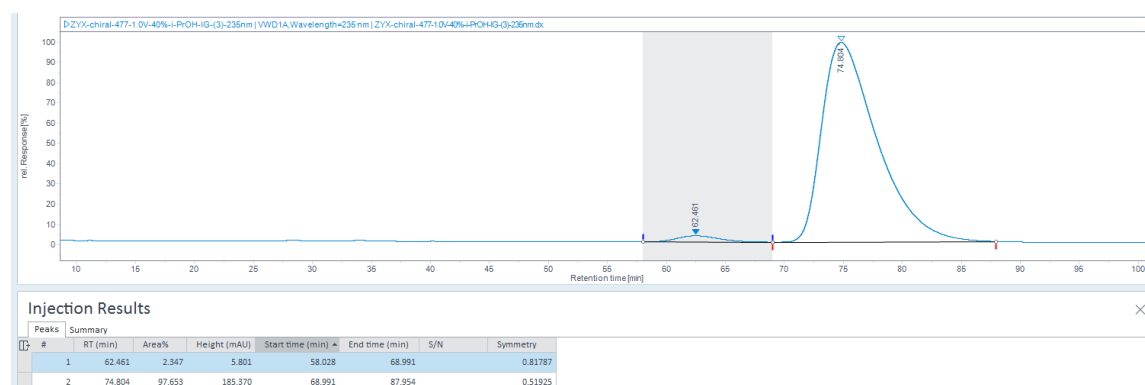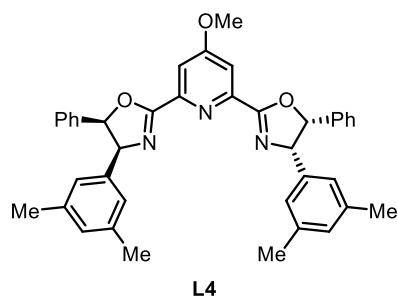

**(4*S*,4'*S*,5*R*,5'*R*)-2,2'-(4-methoxypyridine-2,6-diyl)bis(4-(3,5-dimethylphenyl)-5-phenyl-4,5-dihydrooxazole) (L4):** Purified by recrystallization to afford **L4**, white solid; mp 199-200 °C; 465.7 mg, 56% yield;  $[\alpha]_D^{20} = -97.14$  ( $c = 1.05$ ,  $\text{CHCl}_3$ );  $^1\text{H}$  NMR (400 MHz,  $\text{CDCl}_3$ )  $\delta$  7.98 (s, 2H), 7.14–6.85 (m, 10H), 6.64 (s, 2H), 6.54 (s, 4H), 6.08 (d,  $J = 10.3$  Hz, 2H), 5.70 (d,  $J = 10.3$  Hz, 2H), 4.02 (s, 3H), 2.09 (s, 12H);  $^{13}\text{C}$  NMR (100 MHz,  $\text{CDCl}_3$ )  $\delta$  166.9, 164.0, 148.9, 137.1, 137.0, 136.3, 128.7, 127.5, 126.7, 126.0, 112.7, 86.4, 74.5, 56.2, 21.2; IR (neat,  $\text{cm}^{-1}$ ) 2920, 1642, 1459, 1394, 1297, 1212, 1091, 1038, 970, 860, 738, 697; HRMS (ESI)  $m/z$ : calcd for  $\text{C}_{40}\text{H}_{38}\text{N}_3\text{O}_3$   $[\text{M}+\text{H}]^+$ : 608.2908; Found: 608.2908.



## X-ray crystallographic information of product 1

The crystal was obtained by recrystallization in  $\text{CH}_2\text{Cl}_2/n$ -hexane at room temperature for four days.

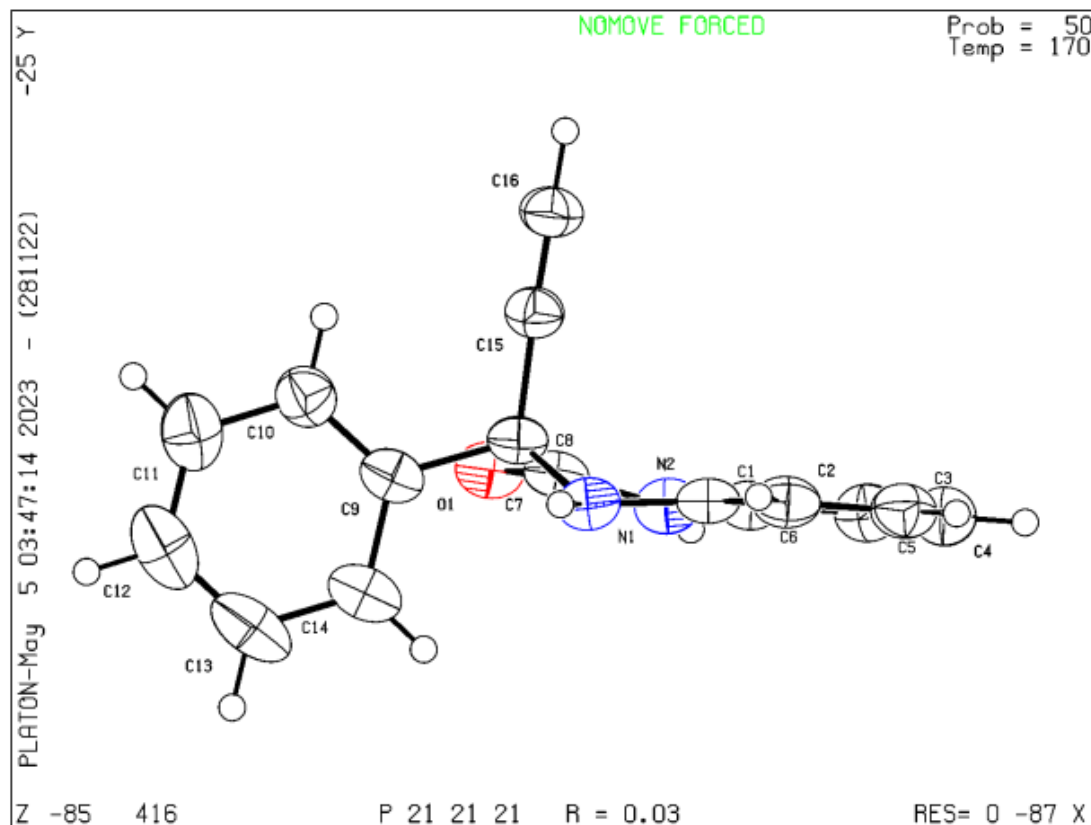

**Figure 1.** Molecular structure of product 1 with thermal ellipsoid of 50% probability

**Table 1** Crystal data and structure refinement for 1.

|                     |                                                |
|---------------------|------------------------------------------------|
| Identification code | 416                                            |
| Empirical formula   | $\text{C}_{16}\text{H}_{12}\text{N}_2\text{O}$ |
| Formula weight      | 248.28                                         |
| Temperature/K       | 169.99(10)                                     |
| Crystal system      | orthorhombic                                   |
| Space group         | $P2_12_12_1$                                   |
| $a/\text{\AA}$      | 7.96470(10)                                    |
| $b/\text{\AA}$      | 10.1591(2)                                     |

|                                               |                                                               |
|-----------------------------------------------|---------------------------------------------------------------|
| $c/\text{\AA}$                                | 15.9845(3)                                                    |
| $\alpha/^\circ$                               | 90                                                            |
| $\beta/^\circ$                                | 90                                                            |
| $\gamma/^\circ$                               | 90                                                            |
| Volume/ $\text{\AA}^3$                        | 1293.37(4)                                                    |
| Z                                             | 4                                                             |
| $\rho_{\text{calc}}/\text{cm}^3$              | 1.275                                                         |
| $\mu/\text{mm}^{-1}$                          | 0.648                                                         |
| F(000)                                        | 520.0                                                         |
| Crystal size/ $\text{mm}^3$                   | $0.16 \times 0.12 \times 0.1$                                 |
| Radiation                                     | Cu K $\alpha$ ( $\lambda = 1.54184$ )                         |
| $2\Theta$ range for data collection/ $^\circ$ | 10.318 to 147.326                                             |
| Index ranges                                  | $-9 \leq h \leq 9, -12 \leq k \leq 12, -19 \leq l \leq 19$    |
| Reflections collected                         | 15891                                                         |
| Independent reflections                       | 2583 [ $R_{\text{int}} = 0.0304, R_{\text{sigma}} = 0.0159$ ] |
| Data/restraints/parameters                    | 2583/0/177                                                    |
| Goodness-of-fit on $F^2$                      | 1.051                                                         |
| Final R indexes [ $I \geq 2\sigma(I)$ ]       | $R_1 = 0.0291, wR_2 = 0.0789$                                 |
| Final R indexes [all data]                    | $R_1 = 0.0317, wR_2 = 0.0805$                                 |
| Largest diff. peak/hole / $e \text{\AA}^{-3}$ | 0.14/-0.12                                                    |
| Flack/Hoofst parameter                        | -0.13(9)/-0.10(9)                                             |

### Crystal structure determination of [1]

**Crystal Data** for  $\text{C}_{16}\text{H}_{12}\text{N}_2\text{O}$  ( $M = 248.28$  g/mol): orthorhombic, space group  $P2_12_12_1$  (no. 19),  $a = 7.96470(10)$   $\text{\AA}$ ,  $b = 10.1591(2)$   $\text{\AA}$ ,  $c = 15.9845(3)$   $\text{\AA}$ ,  $V =$

1293.37(4) Å<sup>3</sup>,  $Z = 4$ ,  $T = 169.99(10)$  K,  $\mu(\text{Cu K}\alpha) = 0.648$  mm<sup>-1</sup>,  $D_{\text{calc}} = 1.275$  g/cm<sup>3</sup>, 15891 reflections measured ( $10.318^\circ \leq 2\Theta \leq 147.326^\circ$ ), 2583 unique ( $R_{\text{int}} = 0.0304$ ,  $R_{\text{sigma}} = 0.0159$ ) which were used in all calculations. The final  $R_1$  was 0.0291 ( $I > 2\sigma(I)$ ) and  $wR_2$  was 0.0805 (all data).

**Table 2 Fractional Atomic Coordinates ( $\times 10^4$ ) and Equivalent Isotropic Displacement Parameters ( $\text{Å}^2 \times 10^3$ ) for 1.  $U_{\text{eq}}$  is defined as 1/3 of the trace of the orthogonalised  $U_{ij}$  tensor.**

| Atom | $x$        | $y$        | $z$        | $U(\text{eq})$ |
|------|------------|------------|------------|----------------|
| O1   | 7078.9(15) | 1244.4(12) | 2424.0(8)  | 48.3(3)        |
| N1   | 4961.7(16) | 4036.1(15) | 3249.8(9)  | 42.1(3)        |
| N2   | 6364.7(18) | 1777.1(14) | 3747.4(10) | 45.1(3)        |
| C1   | 5223.3(19) | 3883.7(16) | 4106.6(11) | 40.4(4)        |
| C2   | 4732(2)    | 4798.7(18) | 4699.7(13) | 47.0(4)        |
| C3   | 4881(2)    | 4514(2)    | 5544.7(13) | 51.7(5)        |
| C4   | 5554(3)    | 3321(2)    | 5803.1(12) | 55.7(5)        |
| C5   | 6079(2)    | 2412(2)    | 5215.3(12) | 51.2(4)        |
| C6   | 5912(2)    | 2691.6(18) | 4373.3(11) | 42.9(4)        |
| C7   | 6593.0(19) | 2058.2(16) | 2934.5(11) | 41.0(4)        |
| C8   | 6232.3(19) | 3501.8(16) | 2681.6(11) | 39.0(4)        |
| C9   | 5519(2)    | 3530.9(17) | 1798.2(11) | 43.1(4)        |
| C10  | 6333(2)    | 4130(2)    | 1147.8(11) | 51.2(4)        |
| C11  | 5641(3)    | 4150(2)    | 346.8(13)  | 63.1(6)        |
| C12  | 4133(3)    | 3543(2)    | 201.2(15)  | 69.5(7)        |
| C13  | 3295(3)    | 2948(2)    | 854.9(16)  | 69.8(7)        |
| C14  | 3967(2)    | 2934(2)    | 1655.0(14) | 57.8(5)        |
| C15  | 7869(2)    | 4201.7(17) | 2747.9(11) | 42.2(4)        |

**Table 2 Fractional Atomic Coordinates ( $\times 10^4$ ) and Equivalent Isotropic Displacement Parameters ( $\text{\AA}^2 \times 10^3$ ) for 1.  $U_{\text{eq}}$  is defined as 1/3 of the trace of the orthogonalised  $U_{\text{ij}}$  tensor.**

| Atom | $x$     | $y$     | $z$        | $U(\text{eq})$ |
|------|---------|---------|------------|----------------|
| C16  | 9173(3) | 4739(2) | 2826.6(12) | 53.2(5)        |

**Table 3 Anisotropic Displacement Parameters ( $\text{\AA}^2 \times 10^3$ ) for 1. The Anisotropic displacement factor exponent takes the form:  $-2\pi^2[h^2a^*U_{11}+2hka^*b^*U_{12}+\dots]$ .**

| Atom | $U_{11}$ | $U_{22}$ | $U_{33}$ | $U_{23}$  | $U_{13}$  | $U_{12}$ |
|------|----------|----------|----------|-----------|-----------|----------|
| O1   | 42.2(6)  | 37.2(7)  | 65.6(8)  | -7.1(5)   | 1.3(5)    | 3.6(5)   |
| N1   | 36.3(7)  | 33.7(7)  | 56.2(8)  | 1.4(6)    | 2.9(6)    | 4.2(6)   |
| N2   | 44.2(7)  | 30.3(7)  | 60.9(9)  | 4.1(7)    | 1.2(6)    | 2.8(6)   |
| C1   | 29.9(7)  | 35.0(8)  | 56.2(9)  | 0.1(7)    | 2.2(6)    | -3.3(6)  |
| C2   | 36.0(8)  | 38.8(9)  | 66.2(12) | -4.3(8)   | 2.9(8)    | 0.5(7)   |
| C3   | 41.7(9)  | 52.7(11) | 60.7(11) | -8.7(9)   | 3.9(8)    | -2.7(8)  |
| C4   | 49.0(10) | 61.4(12) | 56.8(10) | -0.4(9)   | 0.3(8)    | -3.6(9)  |
| C5   | 45.4(9)  | 46.8(10) | 61.4(11) | 6.2(9)    | -0.9(8)   | 1.9(8)   |
| C6   | 34.4(8)  | 36.9(9)  | 57.3(10) | -0.9(7)   | 1.7(7)    | -1.7(6)  |
| C7   | 29.2(7)  | 33.9(8)  | 59.8(10) | -2.8(8)   | -1.4(7)   | -1.0(6)  |
| C8   | 32.7(7)  | 32.8(8)  | 51.5(9)  | -1.7(7)   | 1.0(6)    | -1.7(6)  |
| C9   | 36.2(8)  | 35.4(8)  | 57.5(10) | -6.8(7)   | -5.2(7)   | 5.1(7)   |
| C10  | 45.1(9)  | 56.3(11) | 52.1(10) | -5.6(9)   | -1.7(8)   | 5.6(8)   |
| C11  | 64.8(12) | 71.3(14) | 53.0(11) | -8.1(10)  | -2.3(9)   | 23.6(12) |
| C12  | 69.6(13) | 72.9(15) | 66.0(13) | -25.9(12) | -22.4(12) | 32.5(12) |

**Table 3 Anisotropic Displacement Parameters ( $\text{\AA}^2 \times 10^3$ ) for 1. The Anisotropic displacement factor exponent takes the form:  $-2\pi^2[h^2a^{*2}U_{11}+2hka^*b^*U_{12}+\dots]$ .**

| Atom | $U_{11}$ | $U_{22}$ | $U_{33}$ | $U_{23}$  | $U_{13}$  | $U_{12}$ |
|------|----------|----------|----------|-----------|-----------|----------|
| C13  | 53.1(11) | 61.8(14) | 94.7(17) | -25.5(12) | -29.1(11) | 8.9(11)  |
| C14  | 45.0(10) | 50.6(11) | 77.7(13) | -7.6(10)  | -13.4(9)  | -2.2(8)  |
| C15  | 39.0(8)  | 38.6(9)  | 49.1(9)  | 2.3(7)    | -1.7(7)   | -3.2(7)  |
| C16  | 44.8(9)  | 57.1(11) | 57.8(11) | 7.5(9)    | -6.0(8)   | -15.8(9) |

**Table 4 Bond Lengths for 1.**

| Atom | Atom | Length/ $\text{\AA}$ | Atom | Atom | Length/ $\text{\AA}$ |
|------|------|----------------------|------|------|----------------------|
| O1   | C7   | 1.224(2)             | C7   | C8   | 1.548(2)             |
| N1   | C1   | 1.394(2)             | C8   | C9   | 1.523(2)             |
| N1   | C8   | 1.464(2)             | C8   | C15  | 1.488(2)             |
| N2   | C6   | 1.412(2)             | C9   | C10  | 1.368(3)             |
| N2   | C7   | 1.343(2)             | C9   | C14  | 1.396(2)             |
| C1   | C2   | 1.384(2)             | C10  | C11  | 1.394(3)             |
| C1   | C6   | 1.396(2)             | C11  | C12  | 1.370(4)             |
| C2   | C3   | 1.386(3)             | C12  | C13  | 1.380(4)             |
| C3   | C4   | 1.388(3)             | C13  | C14  | 1.386(3)             |
| C4   | C5   | 1.382(3)             | C15  | C16  | 1.180(2)             |
| C5   | C6   | 1.382(3)             |      |      |                      |

**Table 5 Bond Angles for 1.**

| Atom | Atom | Atom | Angle/°    | Atom | Atom | Atom | Angle/°    |
|------|------|------|------------|------|------|------|------------|
| C1   | N1   | C8   | 117.71(13) | N1   | C8   | C7   | 108.52(14) |
| C7   | N2   | C6   | 125.47(15) | N1   | C8   | C9   | 108.06(13) |
| N1   | C1   | C6   | 117.07(15) | N1   | C8   | C15  | 112.58(13) |
| C2   | C1   | N1   | 123.79(16) | C9   | C8   | C7   | 109.25(13) |
| C2   | C1   | C6   | 118.97(17) | C15  | C8   | C7   | 105.75(13) |
| C1   | C2   | C3   | 120.20(17) | C15  | C8   | C9   | 112.56(14) |
| C2   | C3   | C4   | 120.33(18) | C10  | C9   | C8   | 122.44(15) |
| C5   | C4   | C3   | 119.86(19) | C10  | C9   | C14  | 119.25(18) |
| C6   | C5   | C4   | 119.71(18) | C14  | C9   | C8   | 118.31(17) |
| C1   | C6   | N2   | 117.04(16) | C9   | C10  | C11  | 121.14(19) |
| C5   | C6   | N2   | 122.02(16) | C12  | C11  | C10  | 119.7(2)   |
| C5   | C6   | C1   | 120.90(16) | C11  | C12  | C13  | 119.5(2)   |
| O1   | C7   | N2   | 122.97(16) | C12  | C13  | C14  | 121.1(2)   |
| O1   | C7   | C8   | 121.62(16) | C13  | C14  | C9   | 119.2(2)   |
| N2   | C7   | C8   | 115.40(14) | C16  | C15  | C8   | 177.77(19) |

**Table 6 Torsion Angles for 1.**

| A  | B  | C  | D   | Angle/°    | A  | B  | C  | D  | Angle/°    |
|----|----|----|-----|------------|----|----|----|----|------------|
| O1 | C7 | C8 | N1  | 152.43(15) | C4 | C5 | C6 | C1 | 0.1(3)     |
| O1 | C7 | C8 | C9  | 34.8(2)    | C6 | N2 | C7 | O1 | 175.68(16) |
| O1 | C7 | C8 | C15 | -86.56(18) | C6 | N2 | C7 | C8 | -3.2(2)    |

**Table 6 Torsion Angles for 1.**

| A  | B  | C  | D   | Angle/°     | A   | B   | C   | D   | Angle/°     |
|----|----|----|-----|-------------|-----|-----|-----|-----|-------------|
| N1 | C1 | C2 | C3  | 173.32(16)  | C6  | C1  | C2  | C3  | -1.8(2)     |
| N1 | C1 | C6 | N2  | 3.3(2)      | C7  | N2  | C6  | C1  | 17.8(2)     |
| N1 | C1 | C6 | C5  | -174.34(16) | C7  | N2  | C6  | C5  | -164.54(17) |
| N1 | C8 | C9 | C10 | 125.68(17)  | C7  | C8  | C9  | C10 | -116.43(18) |
| N1 | C8 | C9 | C14 | -53.6(2)    | C7  | C8  | C9  | C14 | 64.25(19)   |
| N2 | C7 | C8 | N1  | -28.72(18)  | C8  | N1  | C1  | C2  | 146.08(15)  |
| N2 | C7 | C8 | C9  | -146.32(14) | C8  | N1  | C1  | C6  | -38.7(2)    |
| N2 | C7 | C8 | C15 | 92.30(17)   | C8  | C9  | C10 | C11 | -179.43(16) |
| C1 | N1 | C8 | C7  | 50.22(18)   | C8  | C9  | C14 | C13 | -179.93(17) |
| C1 | N1 | C8 | C9  | 168.59(14)  | C9  | C10 | C11 | C12 | -1.1(3)     |
| C1 | N1 | C8 | C15 | -66.48(19)  | C10 | C9  | C14 | C13 | 0.7(3)      |
| C1 | C2 | C3 | C4  | 1.3(3)      | C10 | C11 | C12 | C13 | 1.7(3)      |
| C2 | C1 | C6 | N2  | 178.78(14)  | C11 | C12 | C13 | C14 | -1.1(3)     |
| C2 | C1 | C6 | C5  | 1.1(2)      | C12 | C13 | C14 | C9  | -0.1(3)     |
| C2 | C3 | C4 | C5  | 0.0(3)      | C14 | C9  | C10 | C11 | -0.1(3)     |
| C3 | C4 | C5 | C6  | -0.7(3)     | C15 | C8  | C9  | C10 | 0.7(2)      |
| C4 | C5 | C6 | N2  | -177.39(17) | C15 | C8  | C9  | C14 | -178.59(15) |

**Table 7 Hydrogen Atom Coordinates ( $\text{\AA} \times 10^4$ ) and Isotropic Displacement Parameters ( $\text{\AA}^2 \times 10^3$ ) for 1.**

| Atom | x | y | z | U(eq) |
|------|---|---|---|-------|
|------|---|---|---|-------|

**Table 7 Hydrogen Atom Coordinates ( $\text{\AA}\times 10^4$ ) and Isotropic Displacement Parameters ( $\text{\AA}^2\times 10^3$ ) for 1.**

| Atom | x        | y        | z        | U(eq) |
|------|----------|----------|----------|-------|
| H1   | 4450(30) | 4830(20) | 3073(14) | 55(6) |
| H2   | 6509.05  | 954.06   | 3903.16  | 54    |
| H2A  | 4291.94  | 5624.36  | 4527.28  | 56    |
| H3   | 4521.04  | 5138.72  | 5948.96  | 62    |
| H4   | 5653.6   | 3129.43  | 6382.74  | 67    |
| H5   | 6551.55  | 1598.07  | 5389.34  | 61    |
| H10  | 7388.67  | 4538.22  | 1243.7   | 61    |
| H11  | 6213.19  | 4583.39  | -96.22   | 76    |
| H12  | 3668.23  | 3532.56  | -346.02  | 83    |
| H13  | 2240.49  | 2540.41  | 755.05   | 84    |
| H14  | 3377.41  | 2522.1   | 2100.69  | 69    |
| H16  | 10223.27 | 5171.2   | 2889.98  | 64    |

### References

- [1] Liu, T.; Ni, S.; Guo, W. Practical Asymmetric Amine Nucleophilic Approach for the Modular Construction of Protected  $\alpha$ -Quaternary Amino Acids. *Chem. Sci.* **2022**, *13*, 6806-6812.
- [2] Shrestha, B.; Rose, B. T.; Olen, C. L.; Roth, A.; Kwong, A. C.; Wang, Y.; Denmark, S. E. A Unified Strategy for the Asymmetric Synthesis of Highly Substituted 1, 2-Amino Alcohols Leading to Highly Substituted Bisoxazoline Ligands. *J. Org. Chem.* **2021**, *86*, 3490-3534.



## NMR spectra

<sup>1</sup>H NMR spectrum (400 MHz, CDCl<sub>3</sub>)

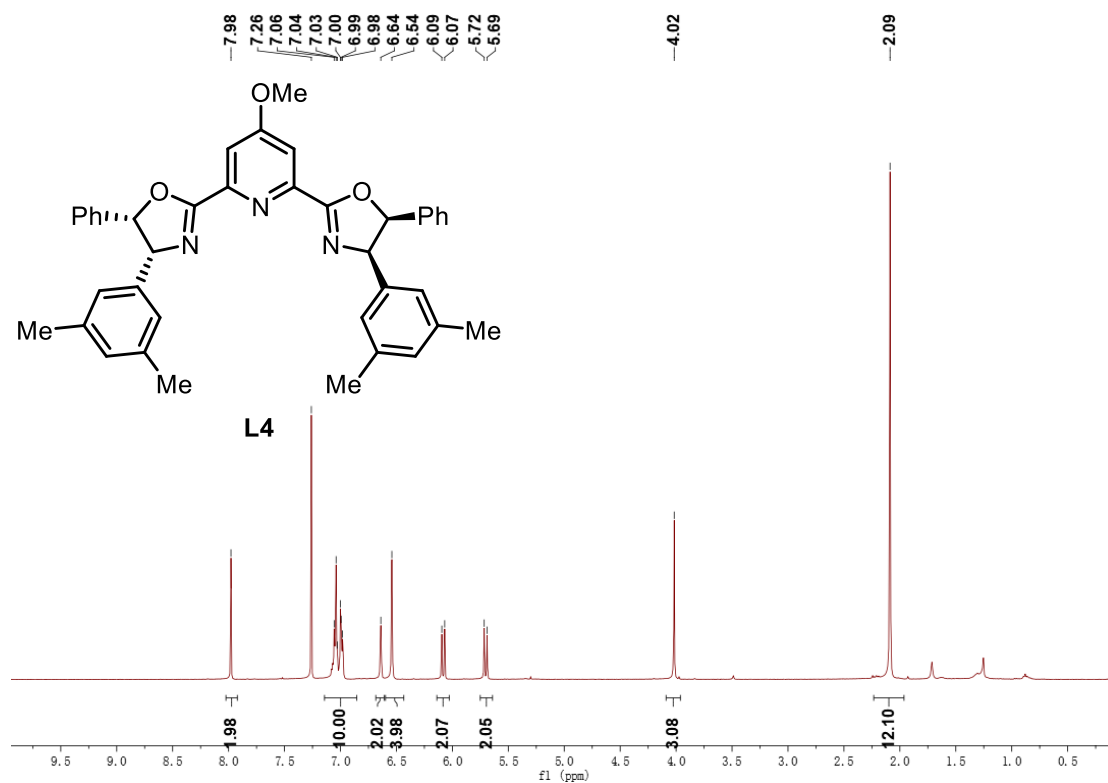

<sup>13</sup>C NMR spectrum (100 MHz, CDCl<sub>3</sub>)

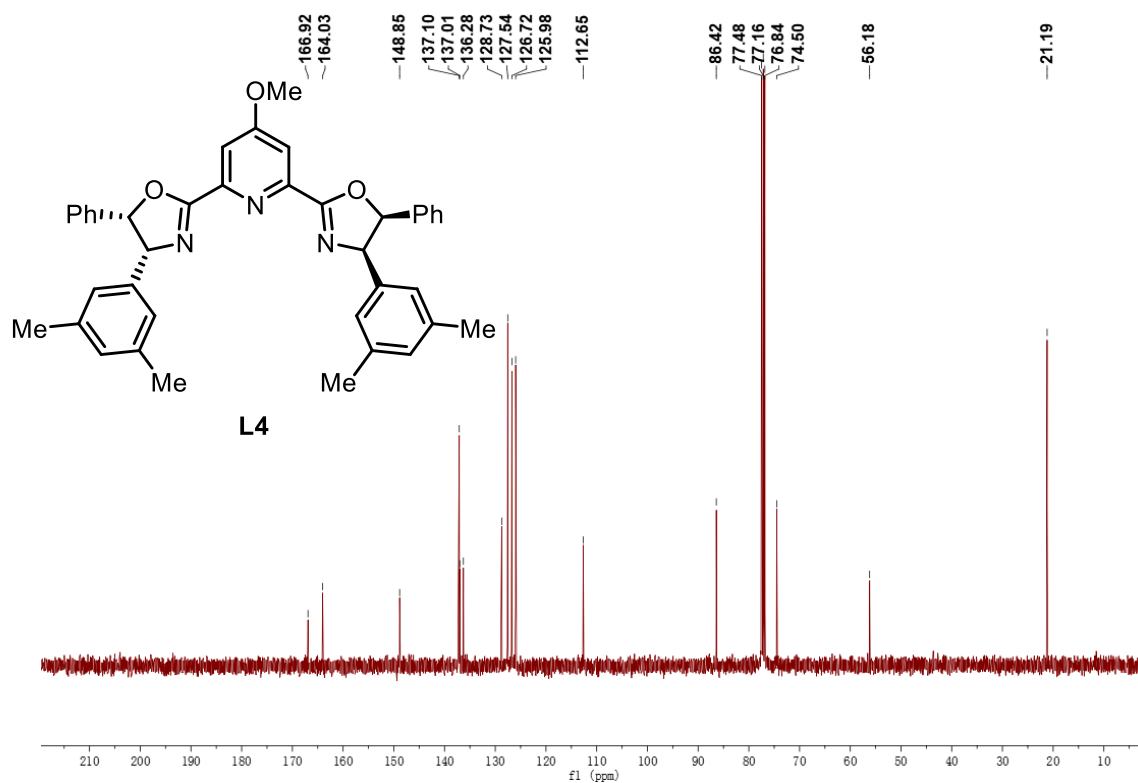

<sup>1</sup>H NMR spectrum (400 MHz, CDCl<sub>3</sub>)

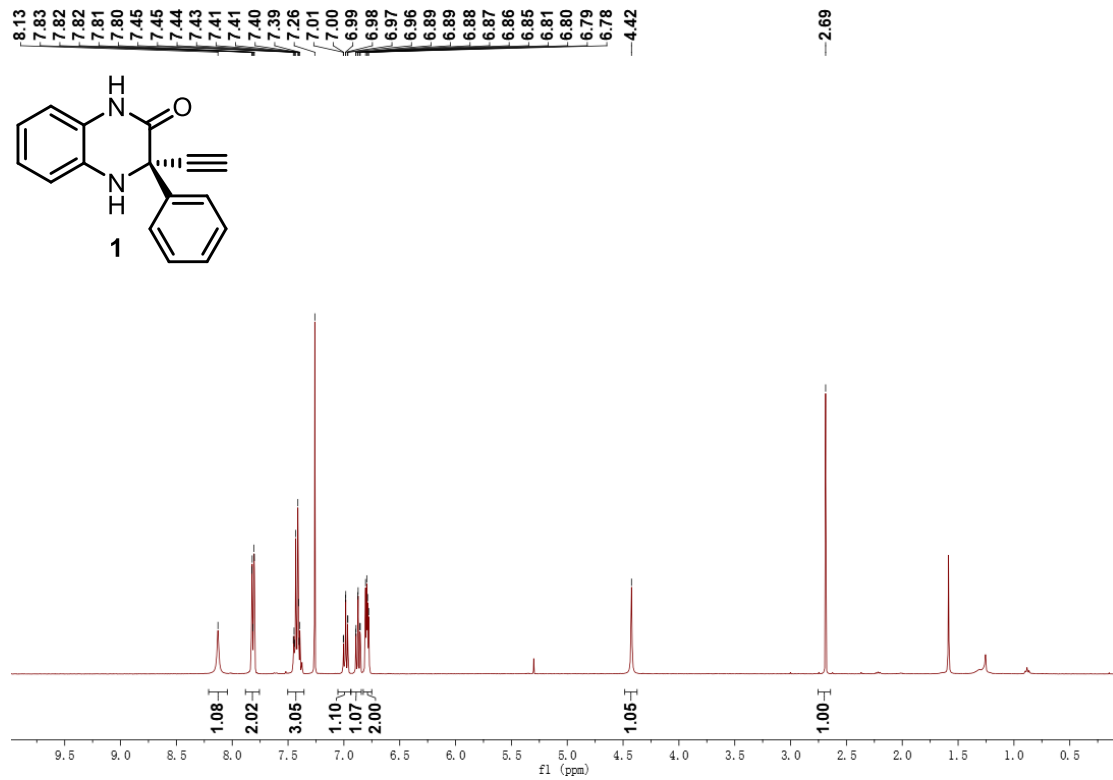

<sup>13</sup>C NMR spectrum (100 MHz, CDCl<sub>3</sub>)

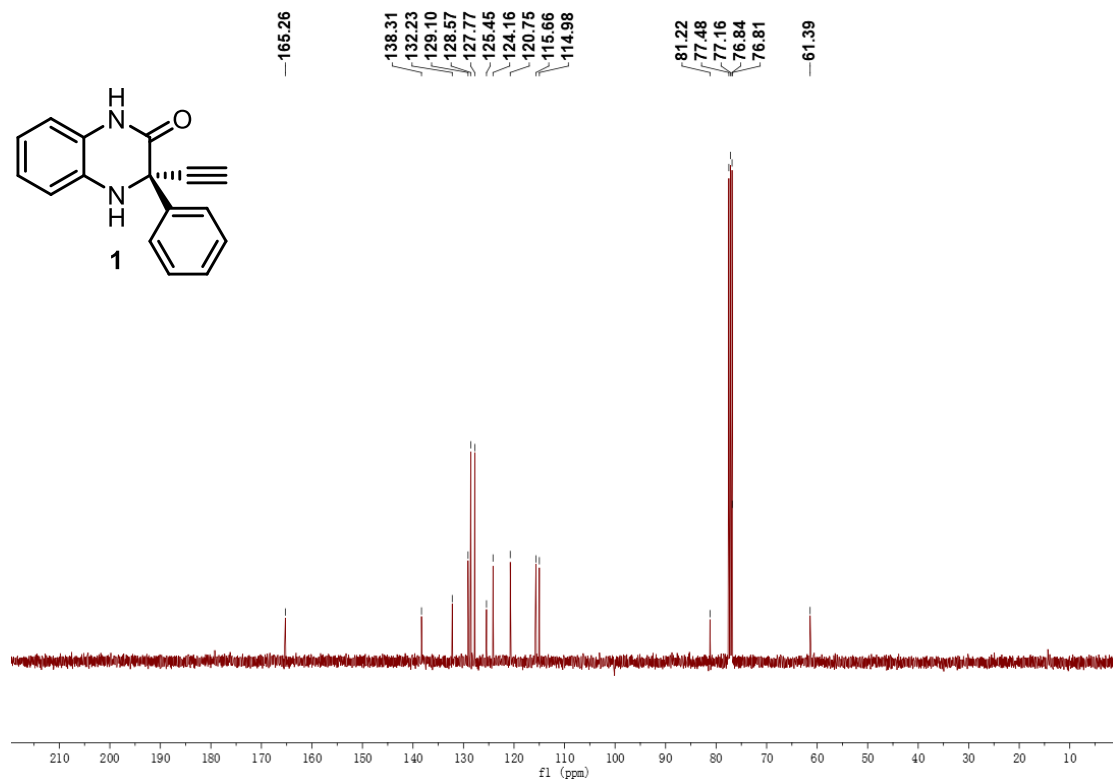

<sup>1</sup>H NMR spectrum (400 MHz, CDCl<sub>3</sub>)

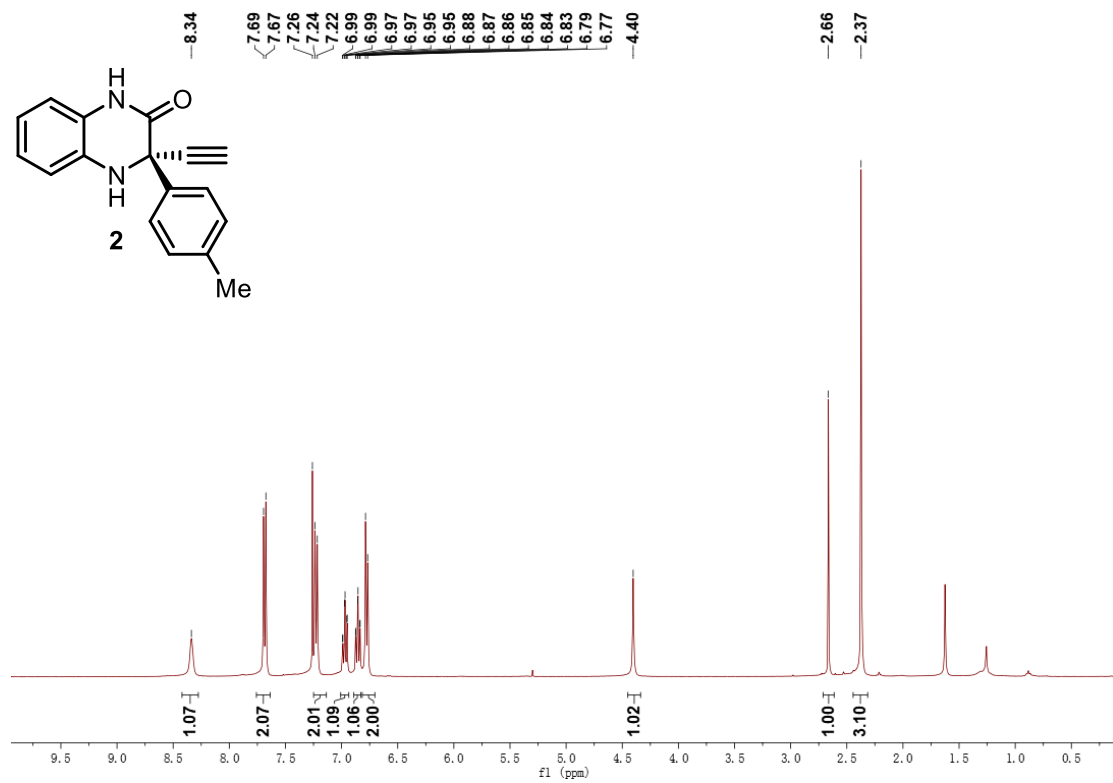

<sup>13</sup>C NMR spectrum (100 MHz, CDCl<sub>3</sub>)

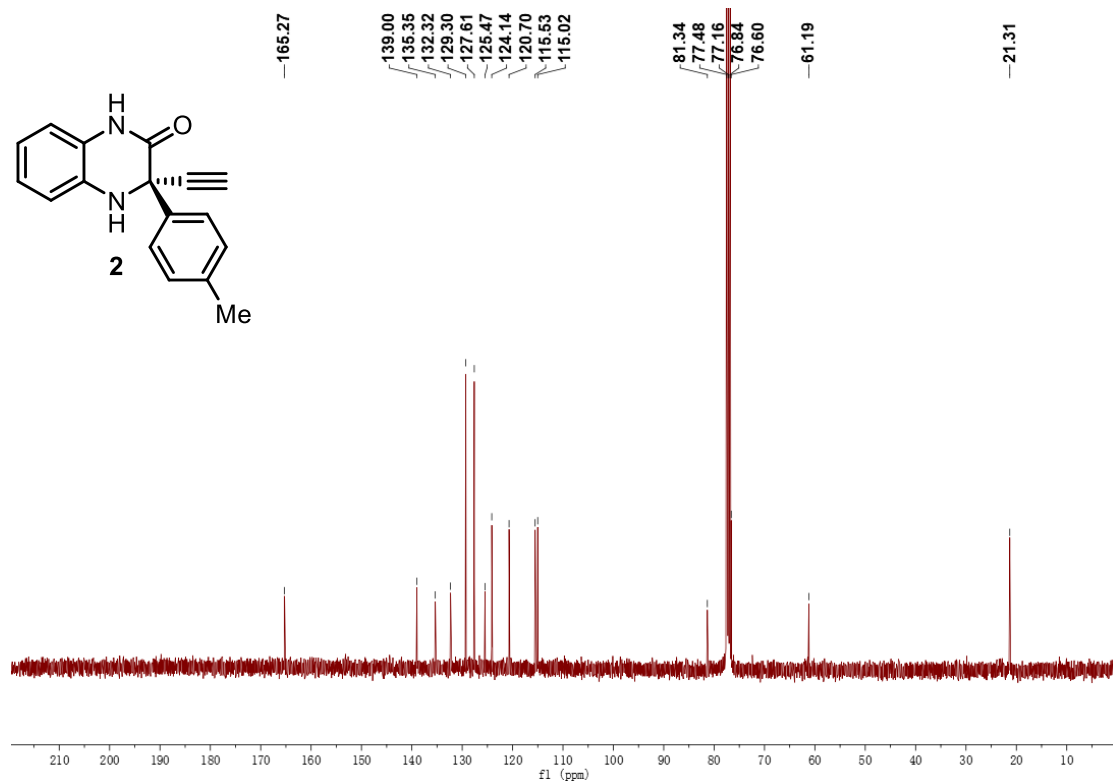

<sup>1</sup>H NMR spectrum (400 MHz, CDCl<sub>3</sub>)

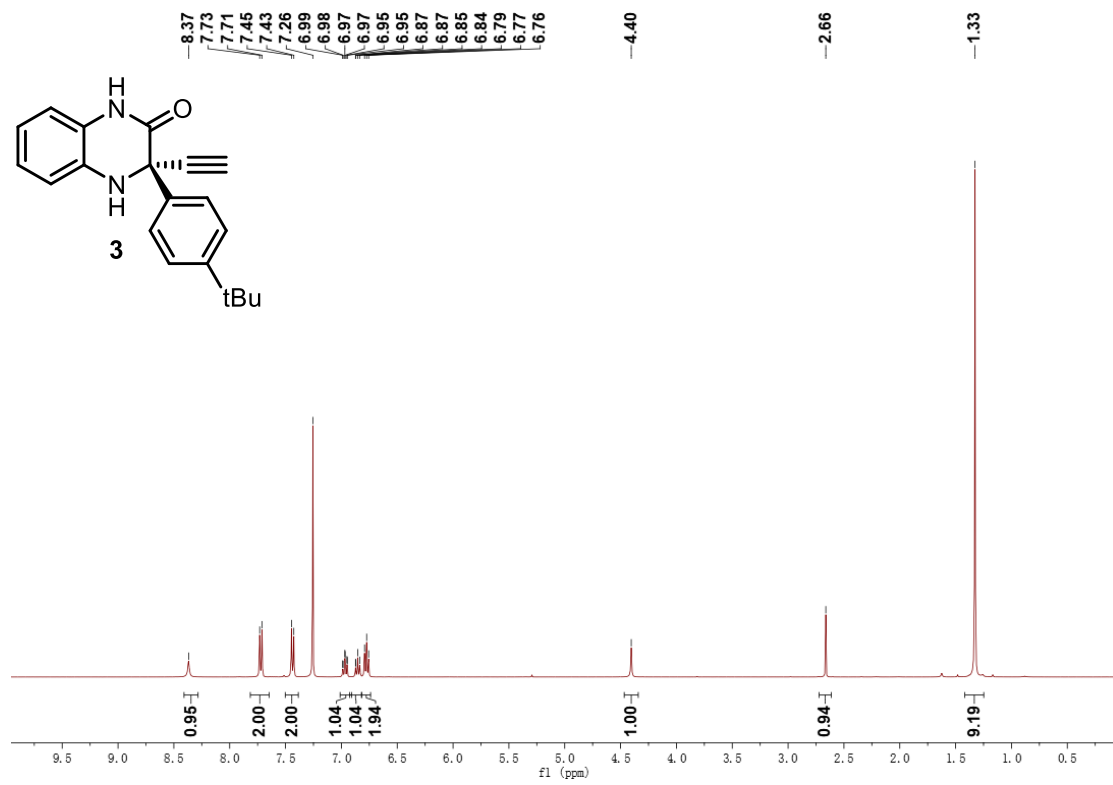

<sup>13</sup>C NMR spectrum (100 MHz, CDCl<sub>3</sub>)

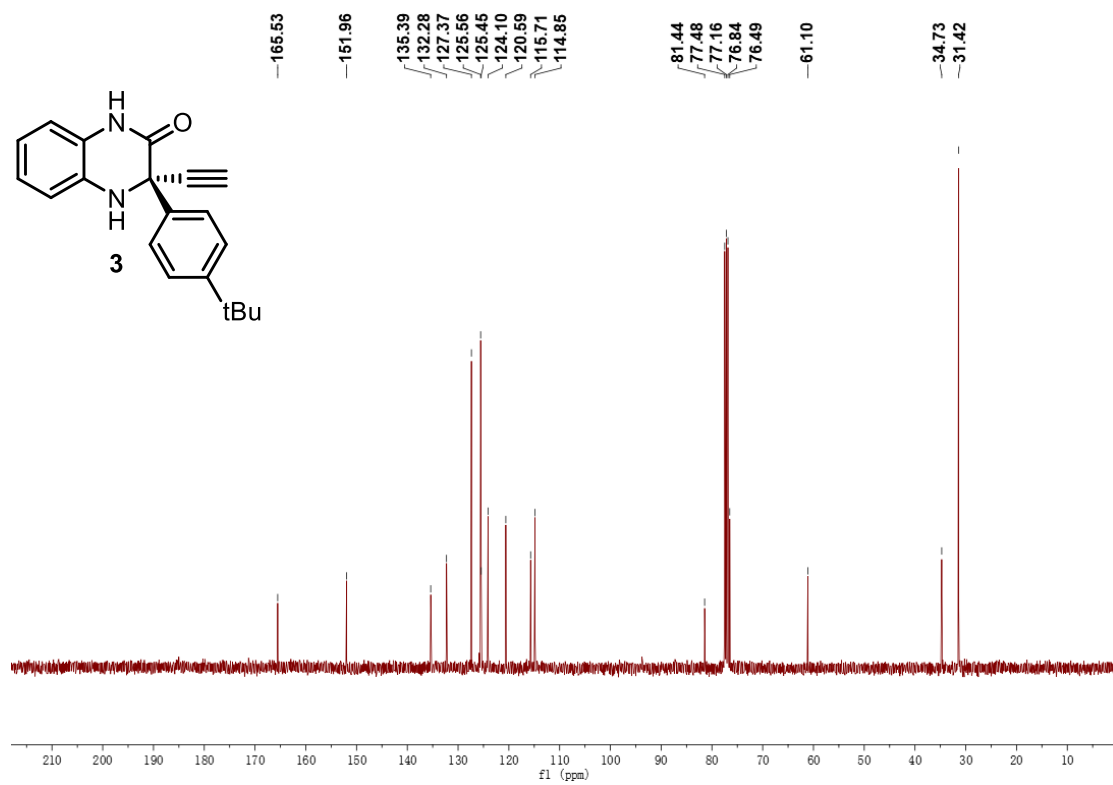

<sup>1</sup>H NMR spectrum (400 MHz, CDCl<sub>3</sub>)

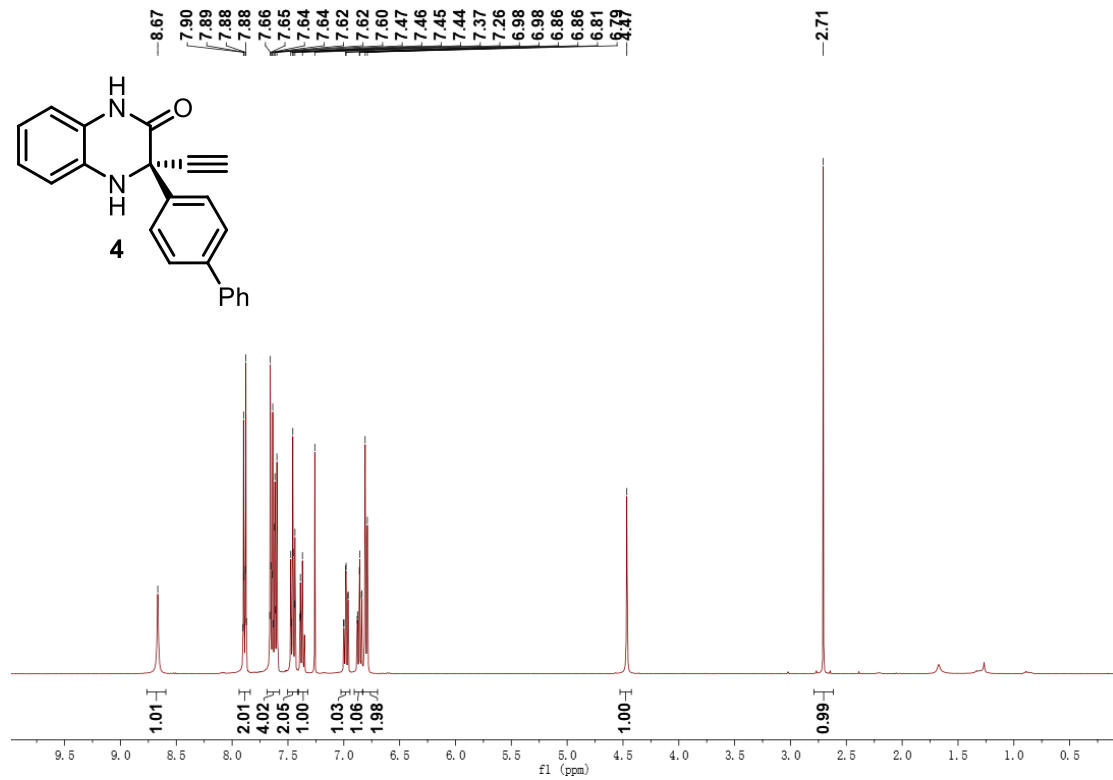

<sup>13</sup>C NMR spectrum (100 MHz, CDCl<sub>3</sub>)

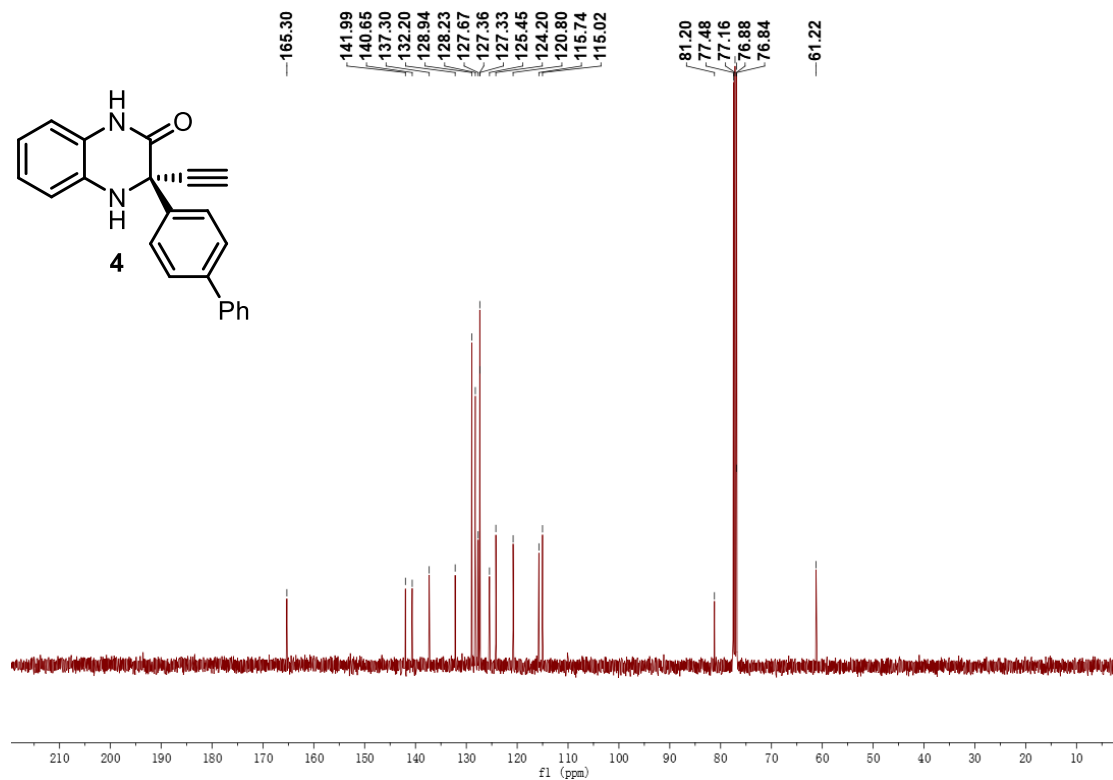

<sup>1</sup>H NMR spectrum (400 MHz, CDCl<sub>3</sub>)

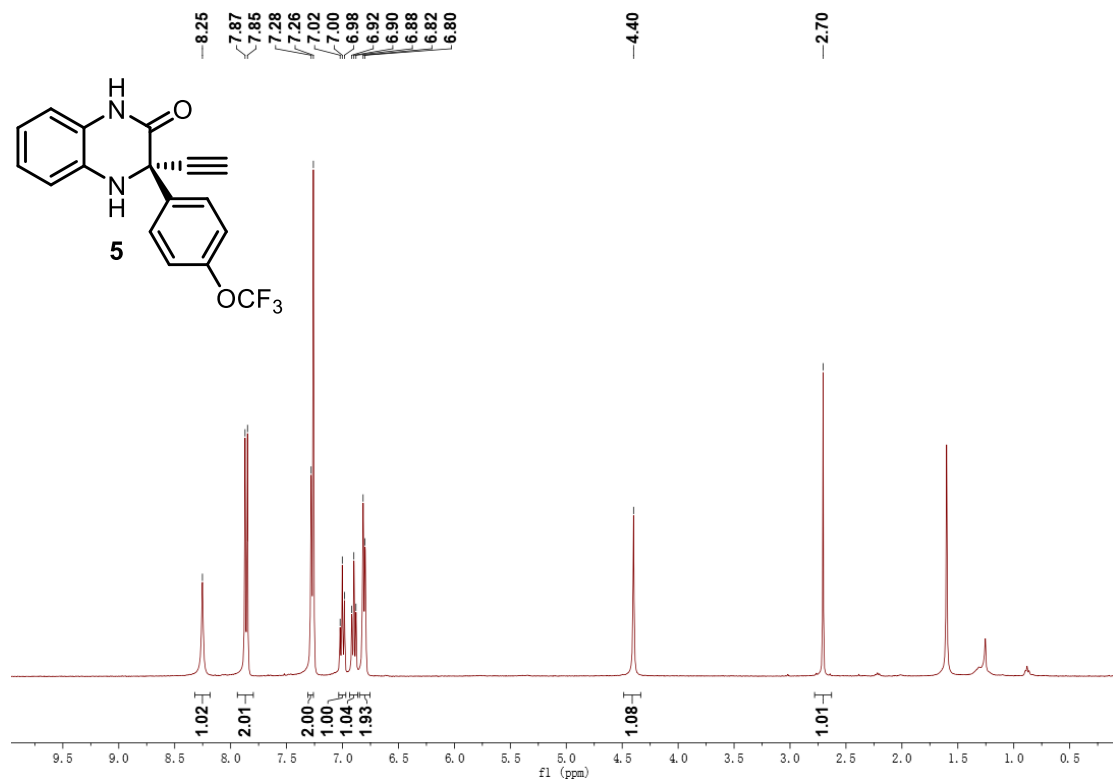

<sup>13</sup>C NMR spectrum (100 MHz, CDCl<sub>3</sub>)

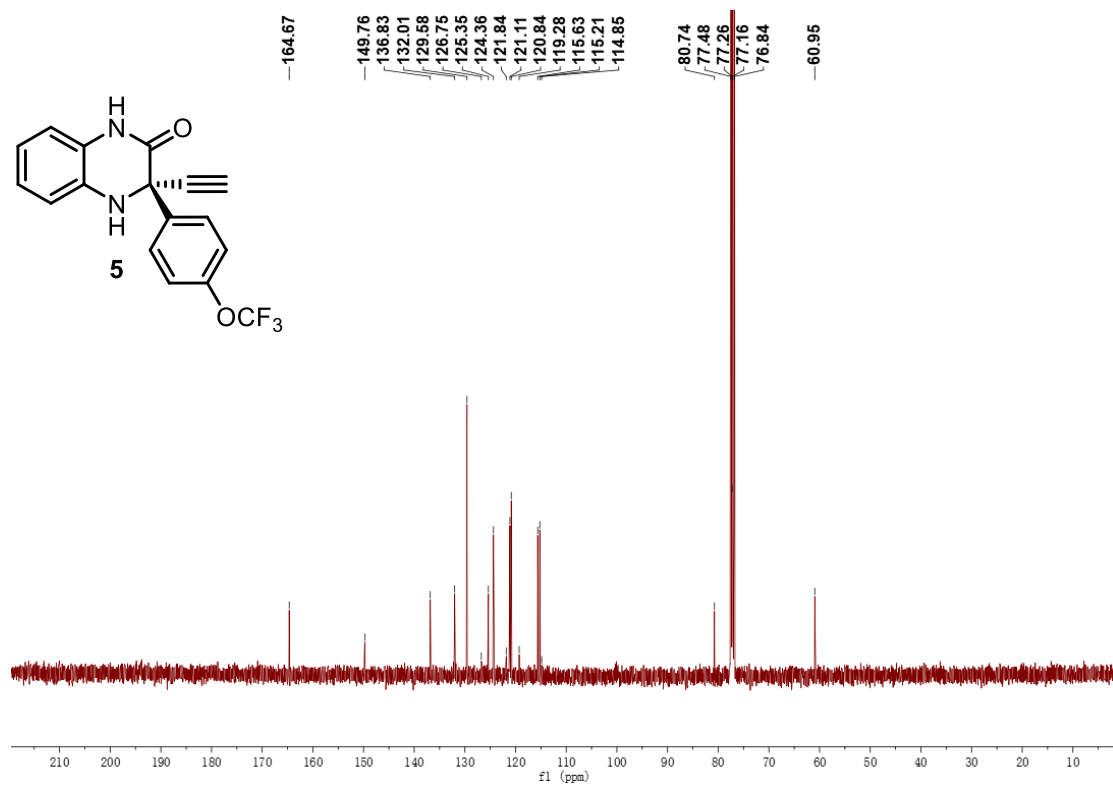

$^{19}\text{F}$  NMR spectrum (376 MHz,  $\text{CDCl}_3$ )

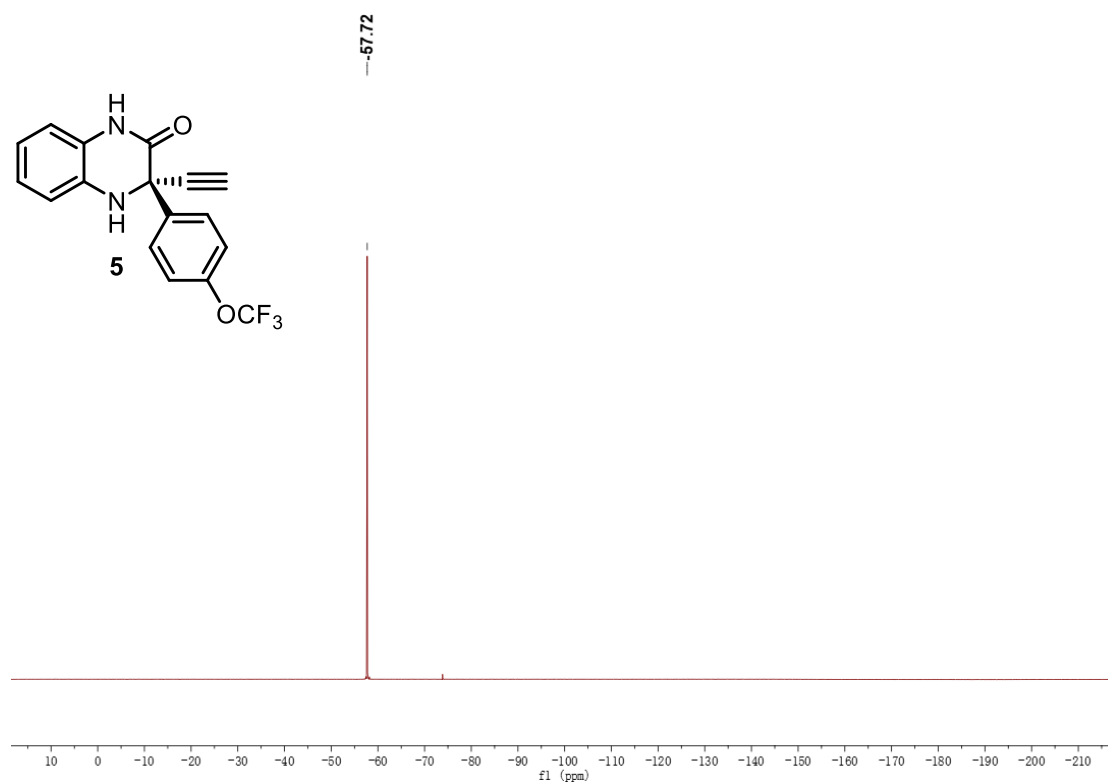

$^1\text{H}$  NMR spectrum (400 MHz,  $\text{CDCl}_3$ )

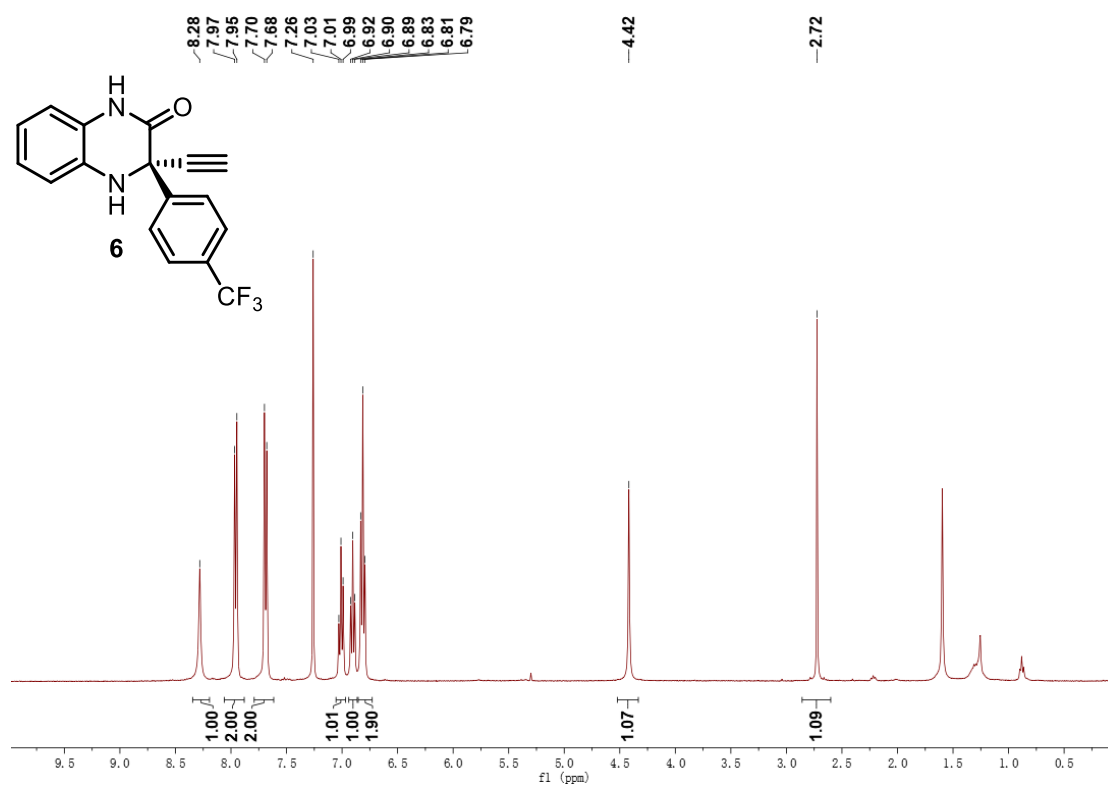

<sup>13</sup>C NMR spectrum (100 MHz, CDCl<sub>3</sub>)

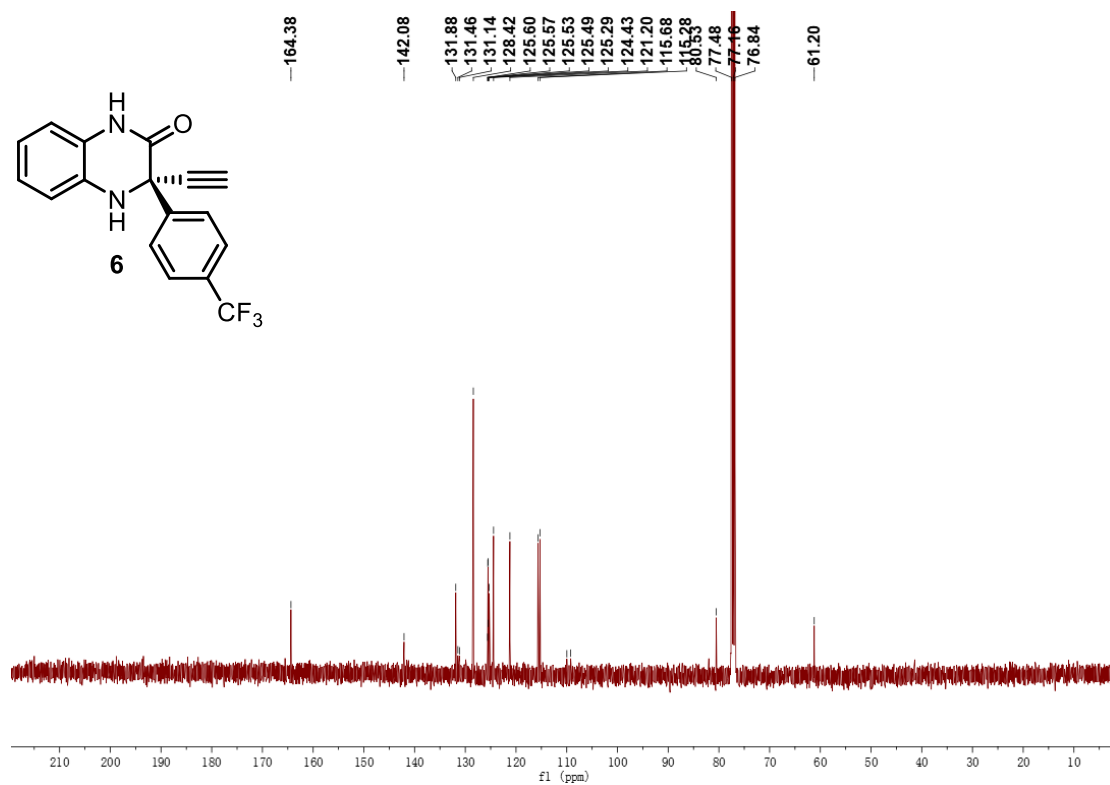

<sup>19</sup>F NMR spectrum (376 MHz, CDCl<sub>3</sub>)

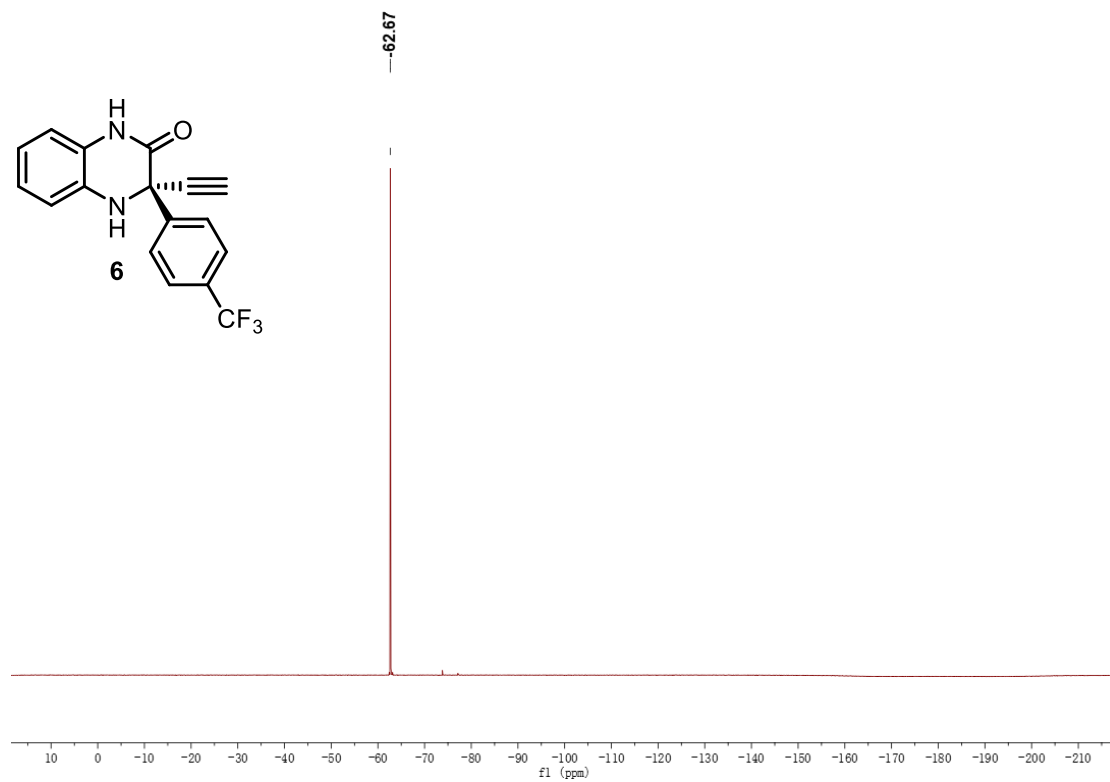



<sup>1</sup>H NMR spectrum (400 MHz, CDCl<sub>3</sub>)

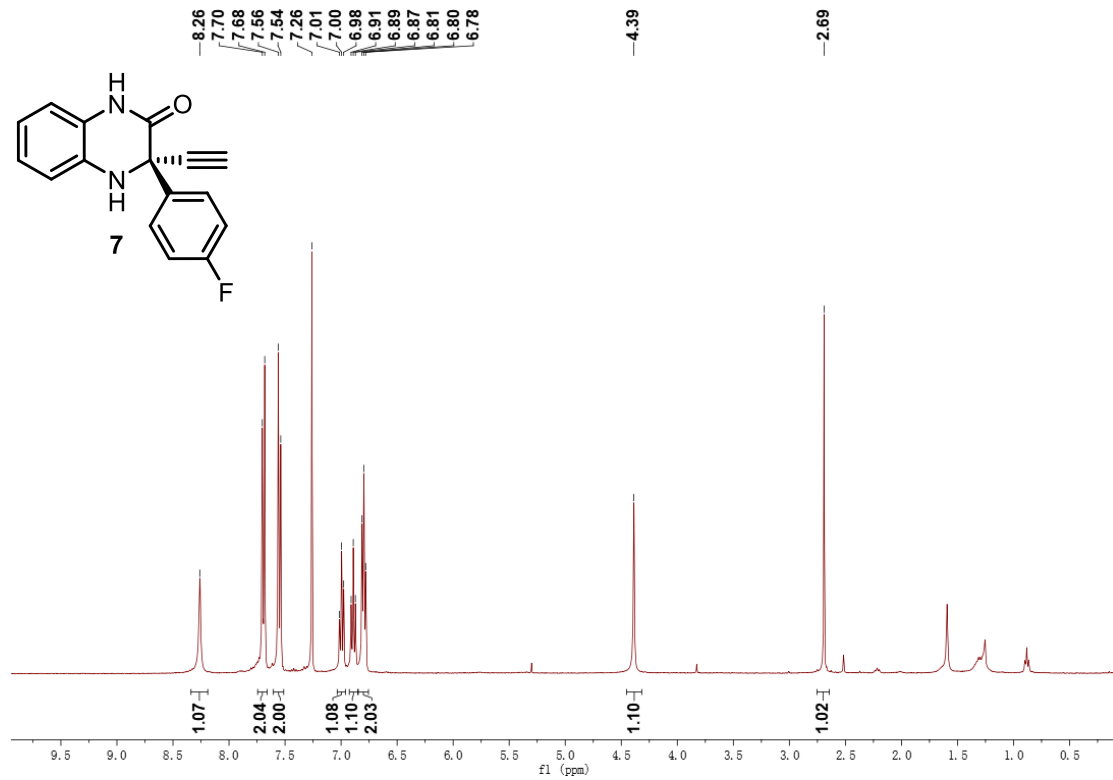

<sup>13</sup>C NMR spectrum (100 MHz, CDCl<sub>3</sub>)

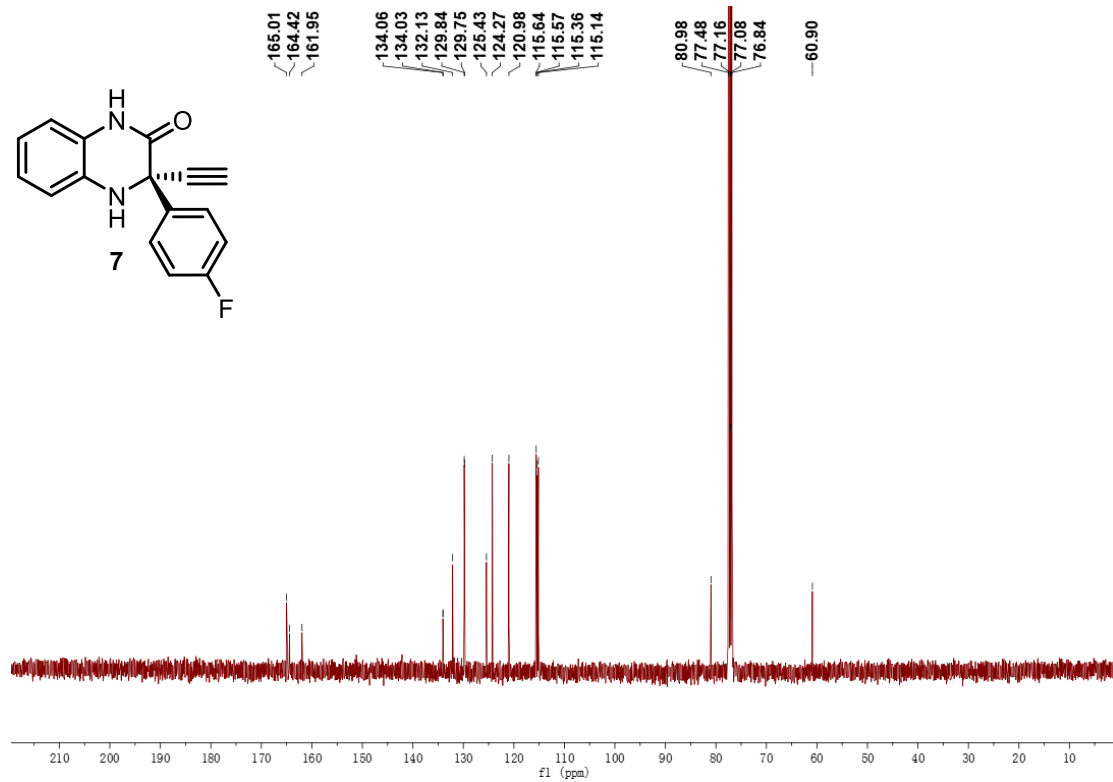

$^{19}\text{F}$  NMR spectrum (376 MHz,  $\text{CDCl}_3$ )

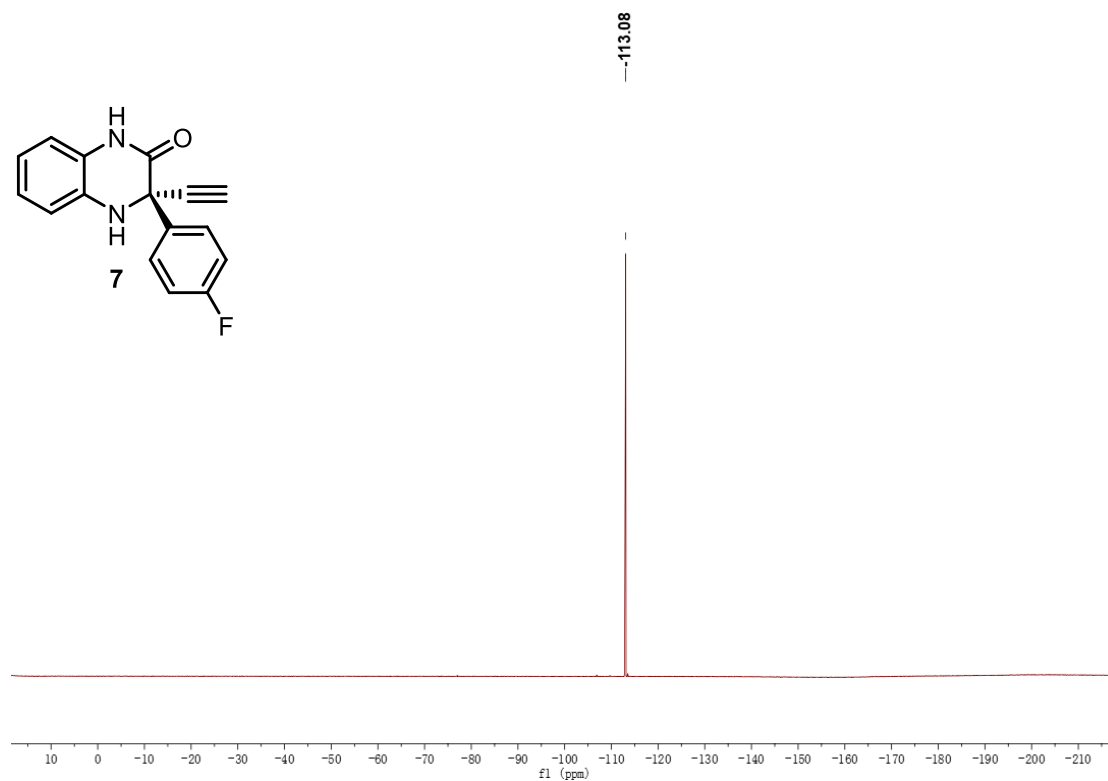

$^1\text{H}$  NMR spectrum (400 MHz,  $\text{CDCl}_3$ )

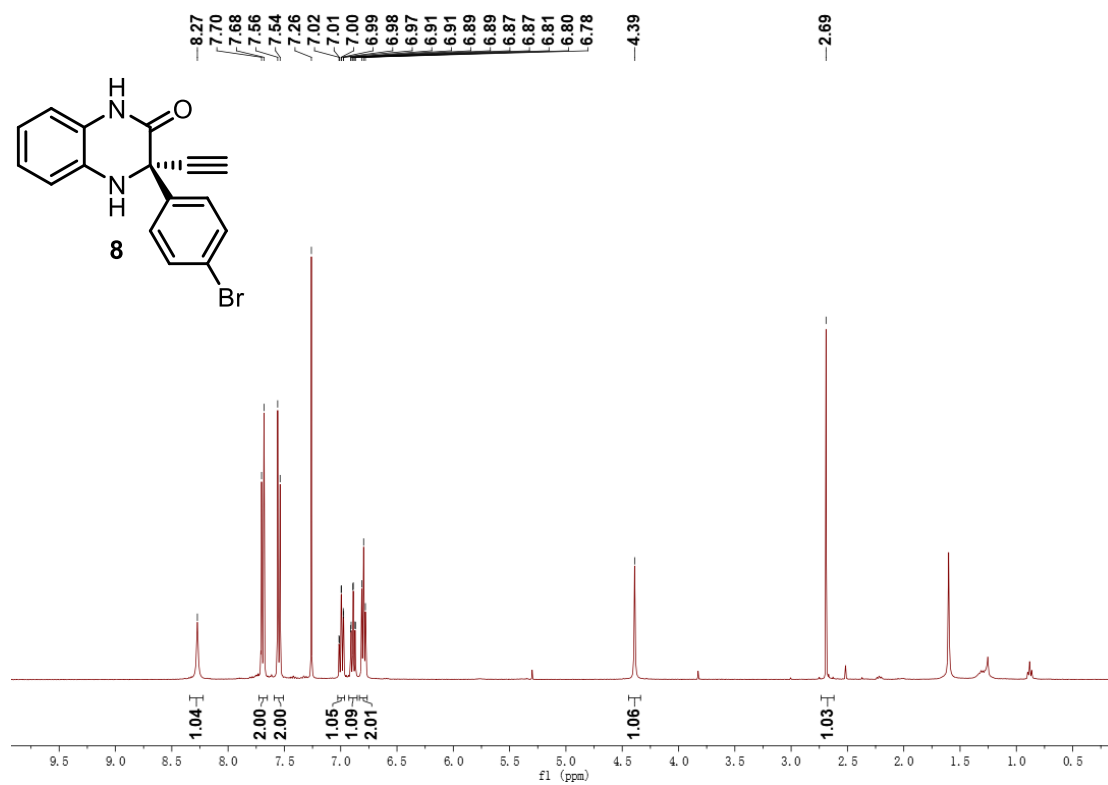

<sup>13</sup>C NMR spectrum (100 MHz, CDCl<sub>3</sub>)

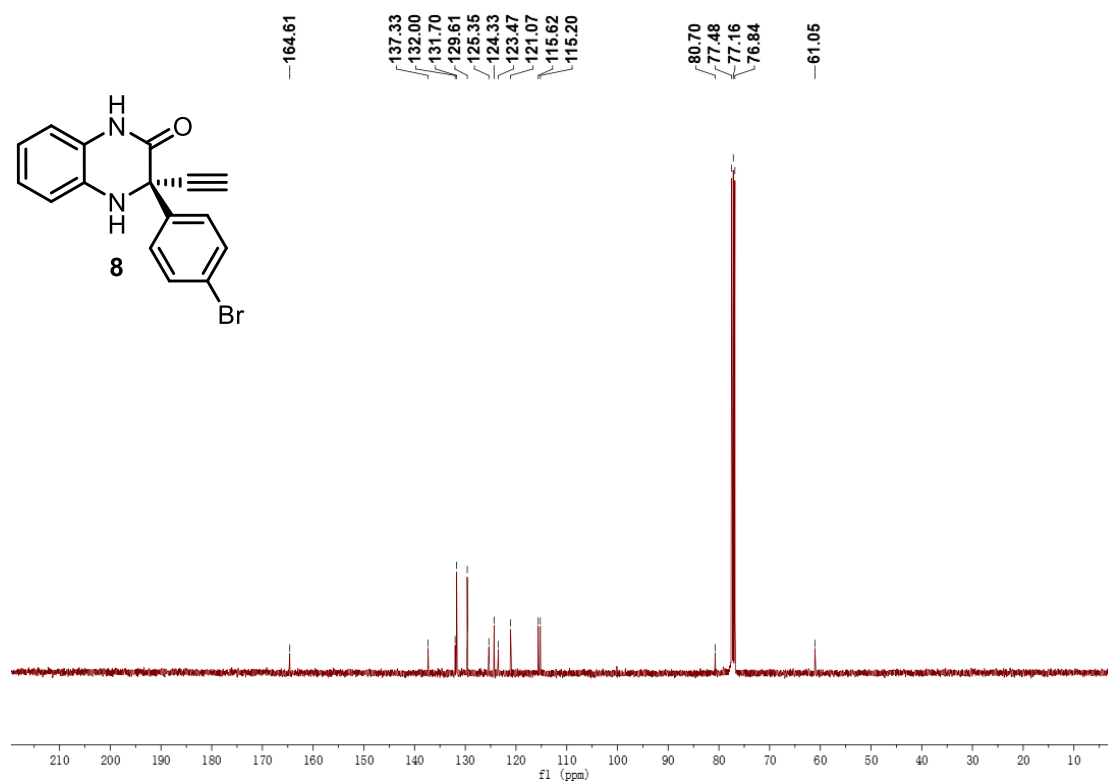

<sup>1</sup>H NMR spectrum (400 MHz, CDCl<sub>3</sub>)

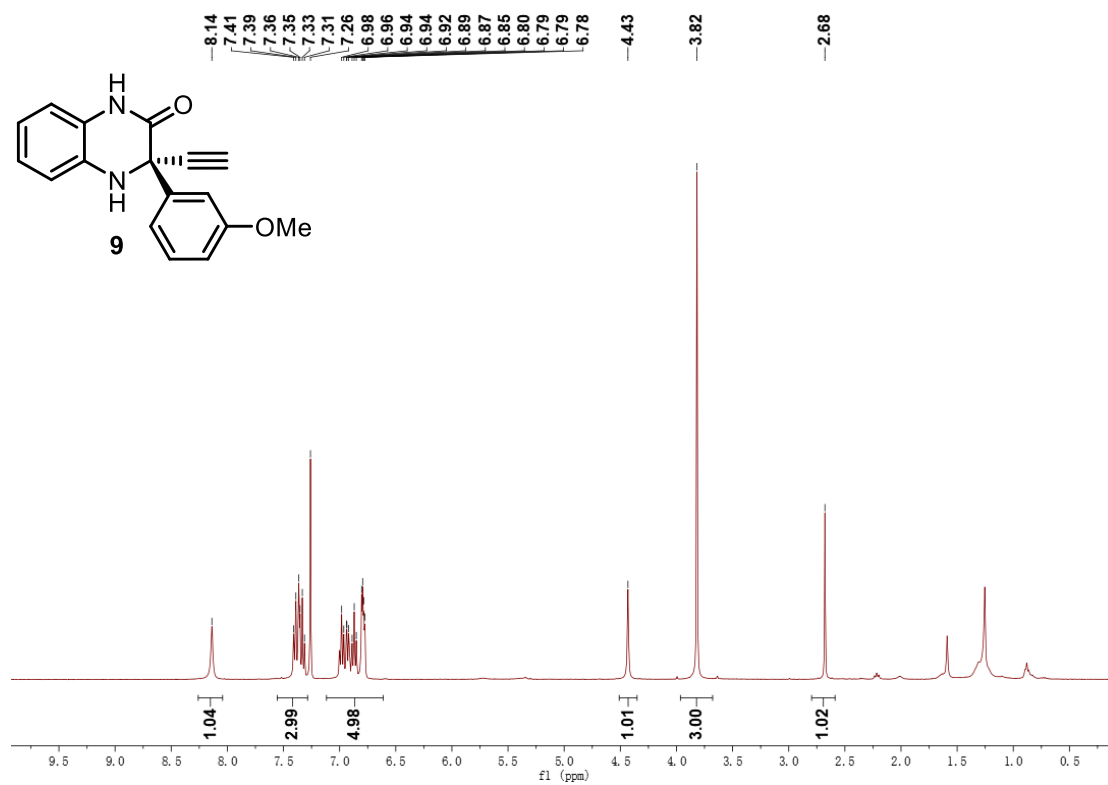

<sup>13</sup>C NMR spectrum (100 MHz, CDCl<sub>3</sub>)

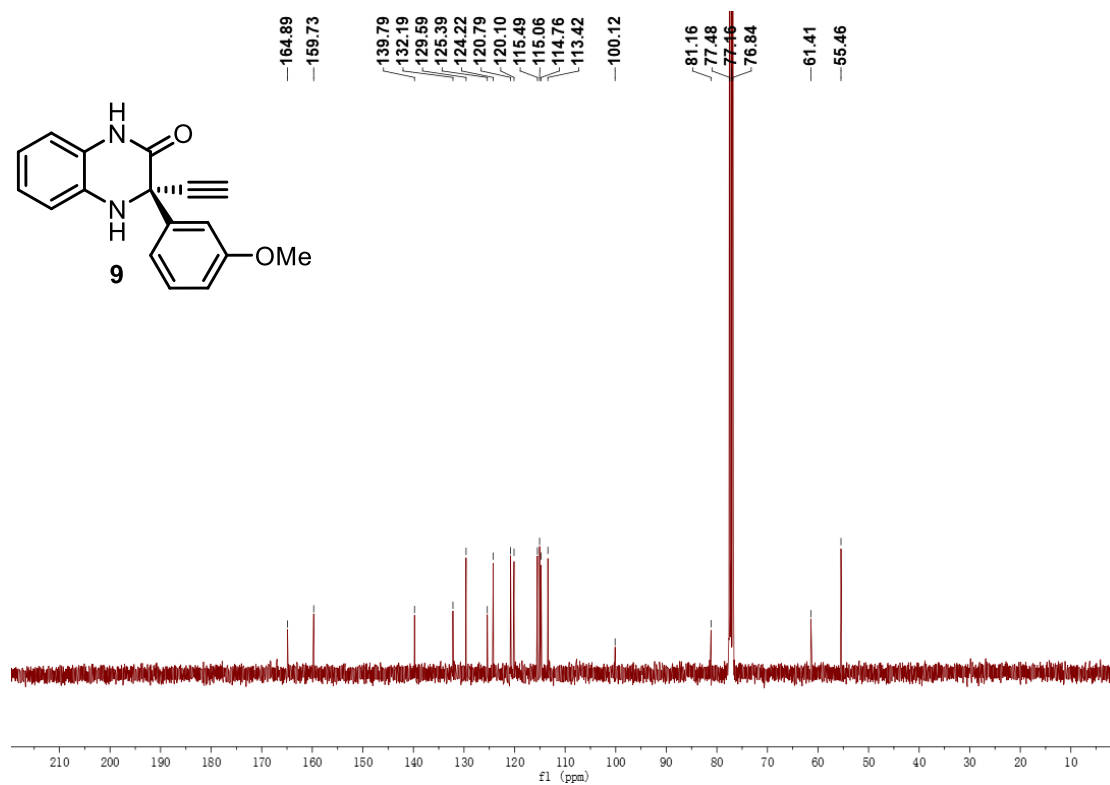

<sup>1</sup>H NMR spectrum (400 MHz, CDCl<sub>3</sub>)

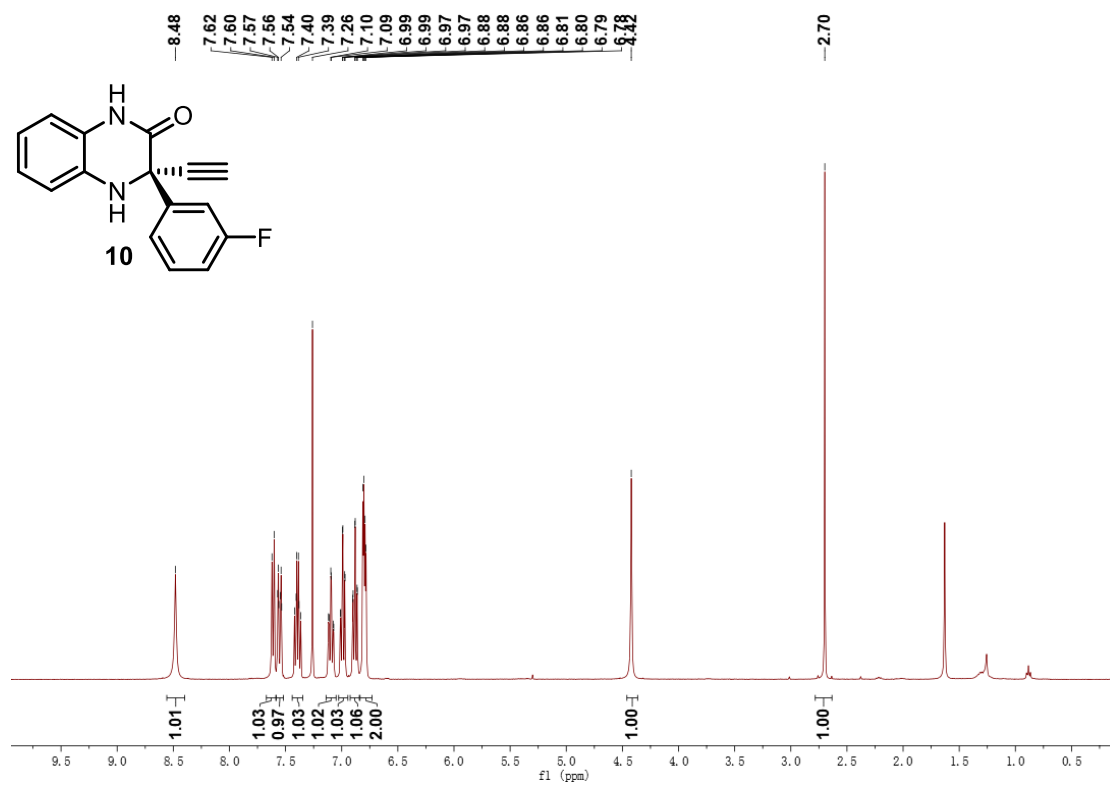

<sup>13</sup>C NMR spectrum (100 MHz, CDCl<sub>3</sub>)

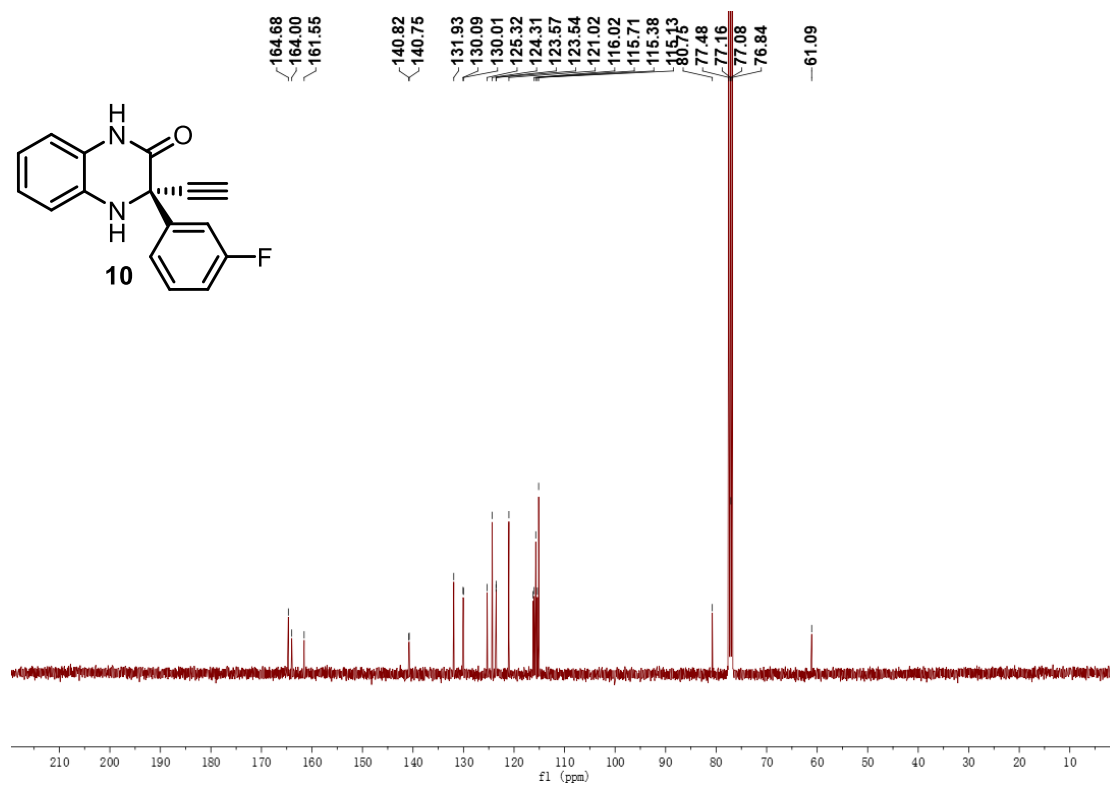

<sup>19</sup>F NMR spectrum (376 MHz, CDCl<sub>3</sub>)

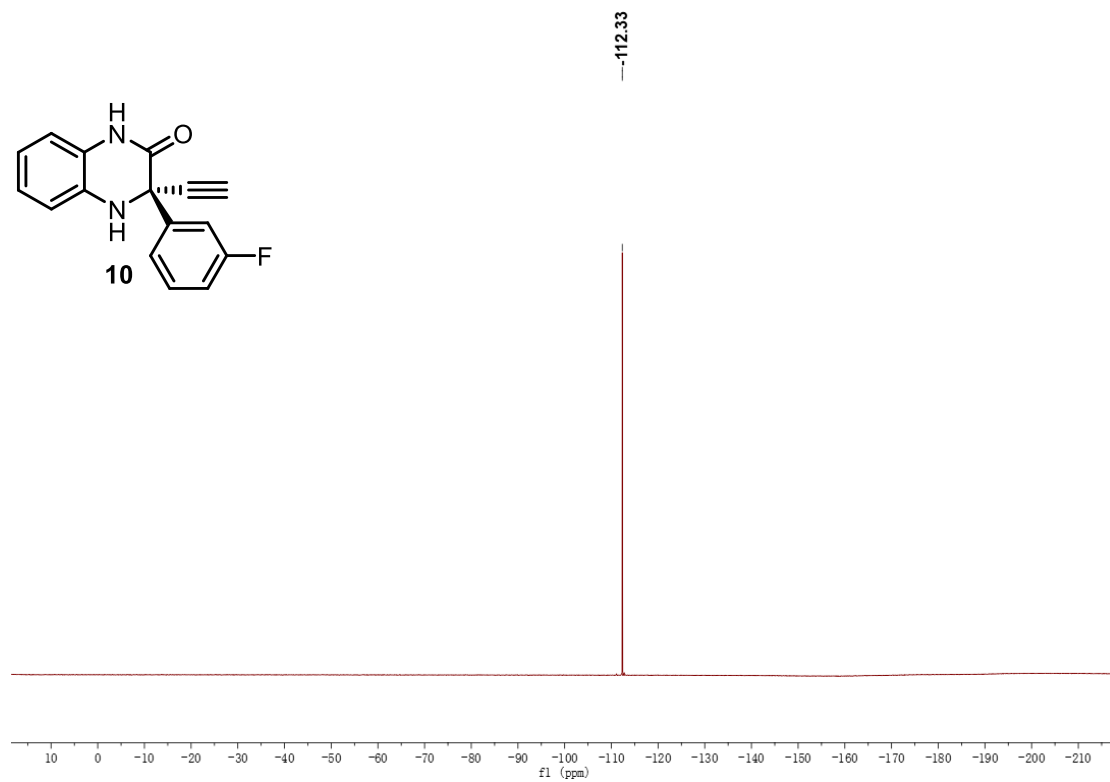

<sup>1</sup>H NMR spectrum (400 MHz, CDCl<sub>3</sub>)

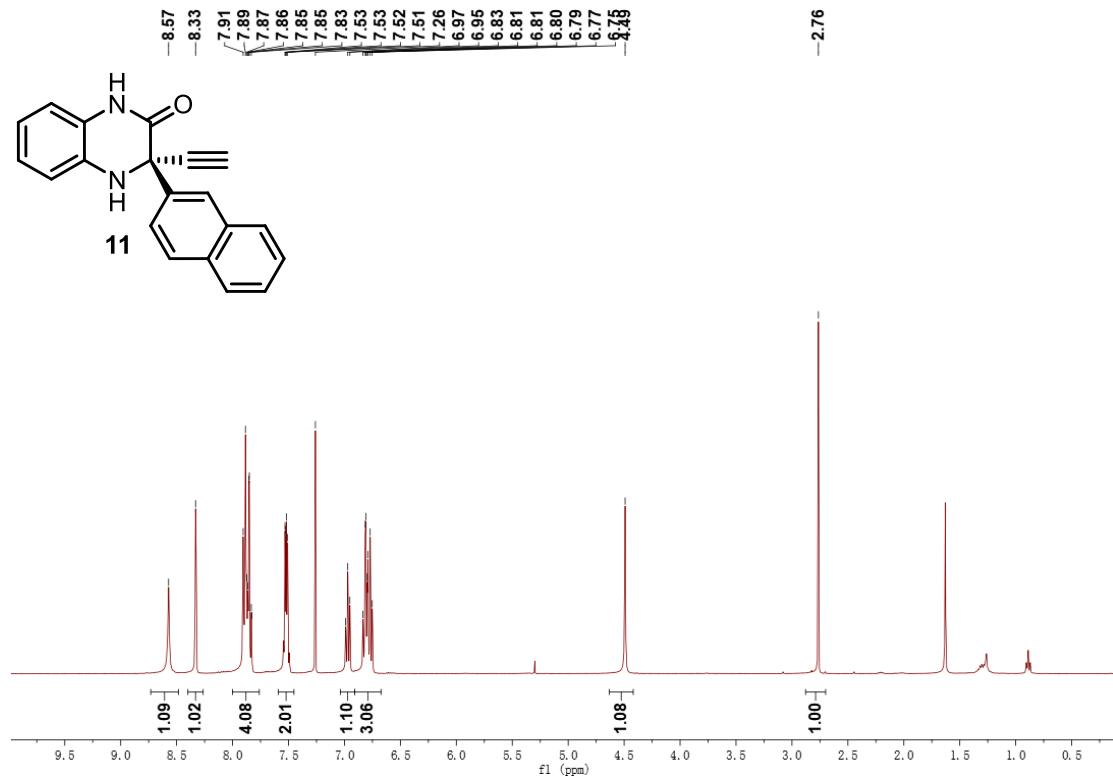

<sup>13</sup>C NMR spectrum (100 MHz, CDCl<sub>3</sub>)

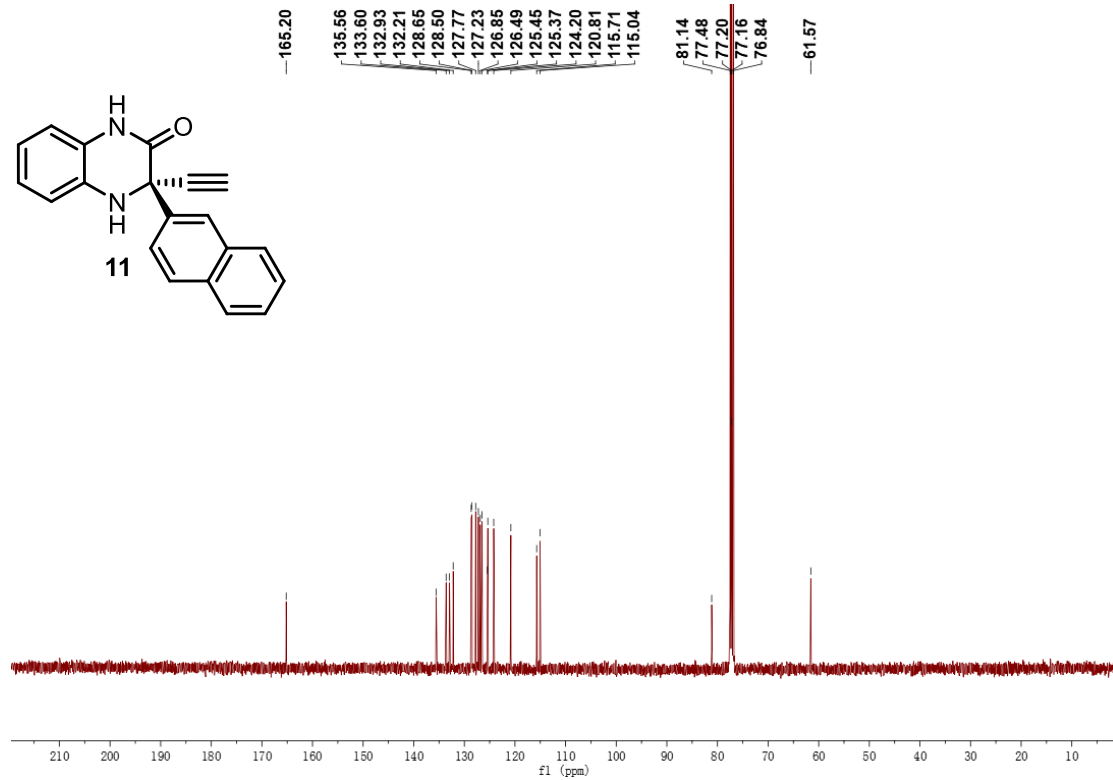

<sup>1</sup>H NMR spectrum (400 MHz, CDCl<sub>3</sub>)

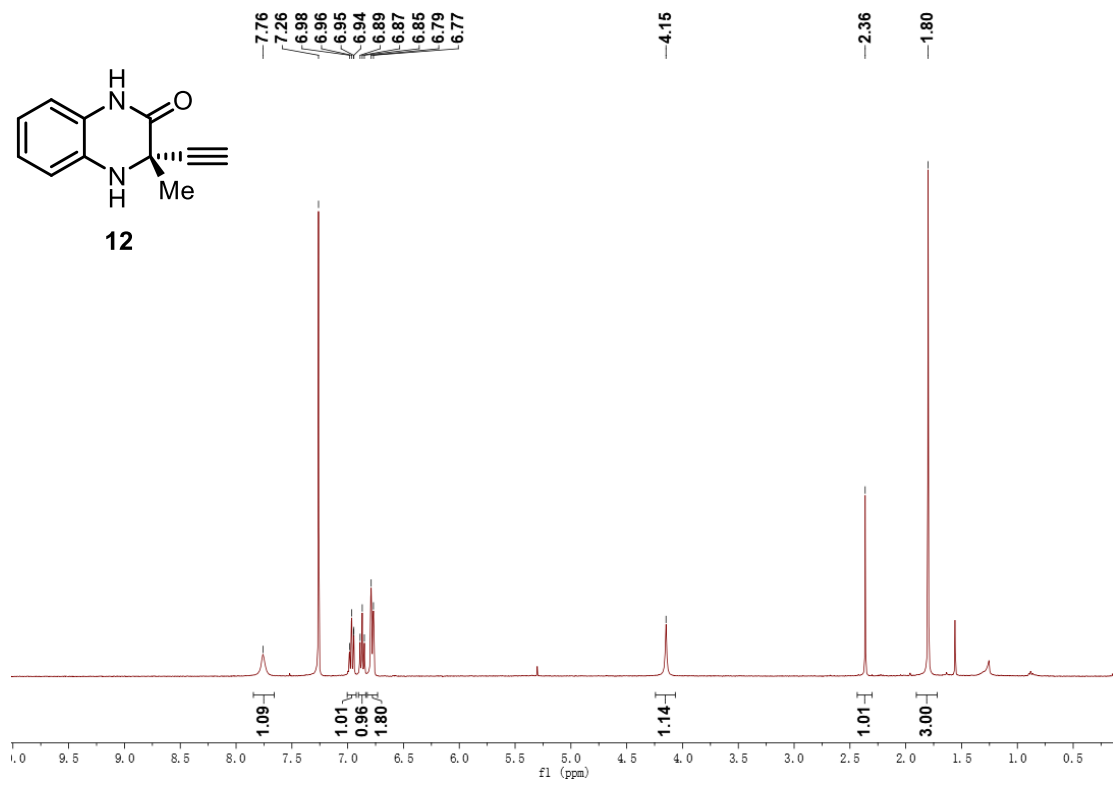

<sup>13</sup>C NMR spectrum (100 MHz, CDCl<sub>3</sub>)

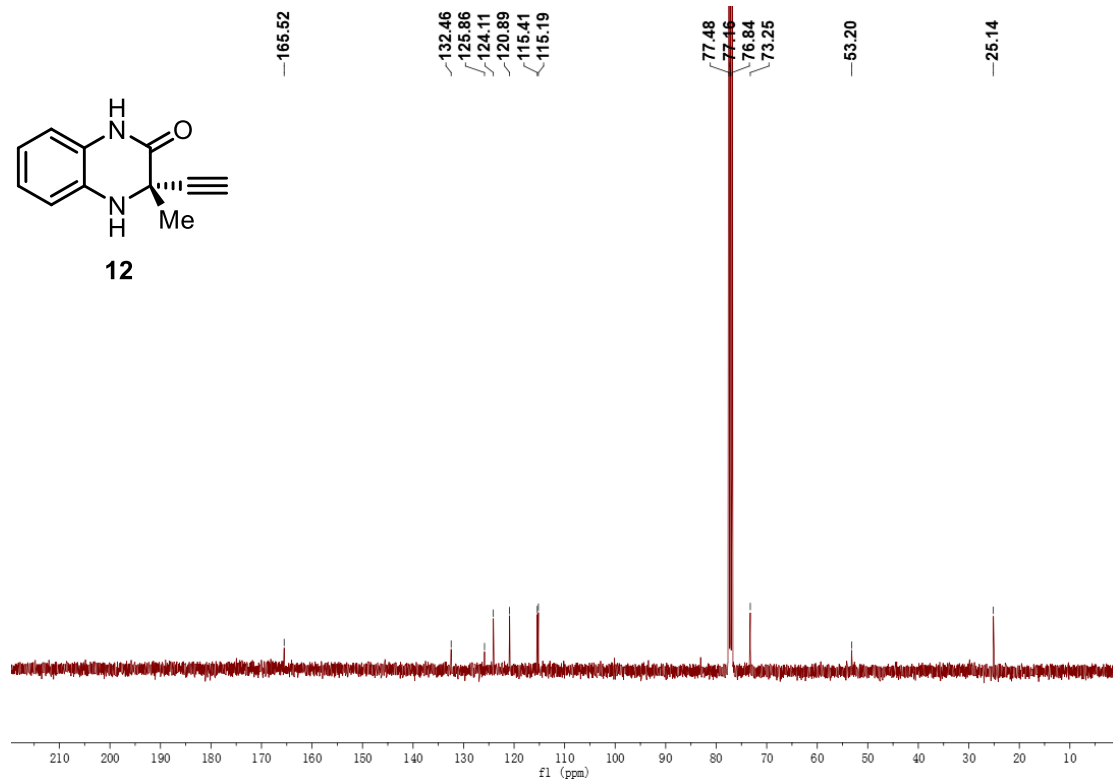

<sup>1</sup>H NMR spectrum (400 MHz, CDCl<sub>3</sub>)

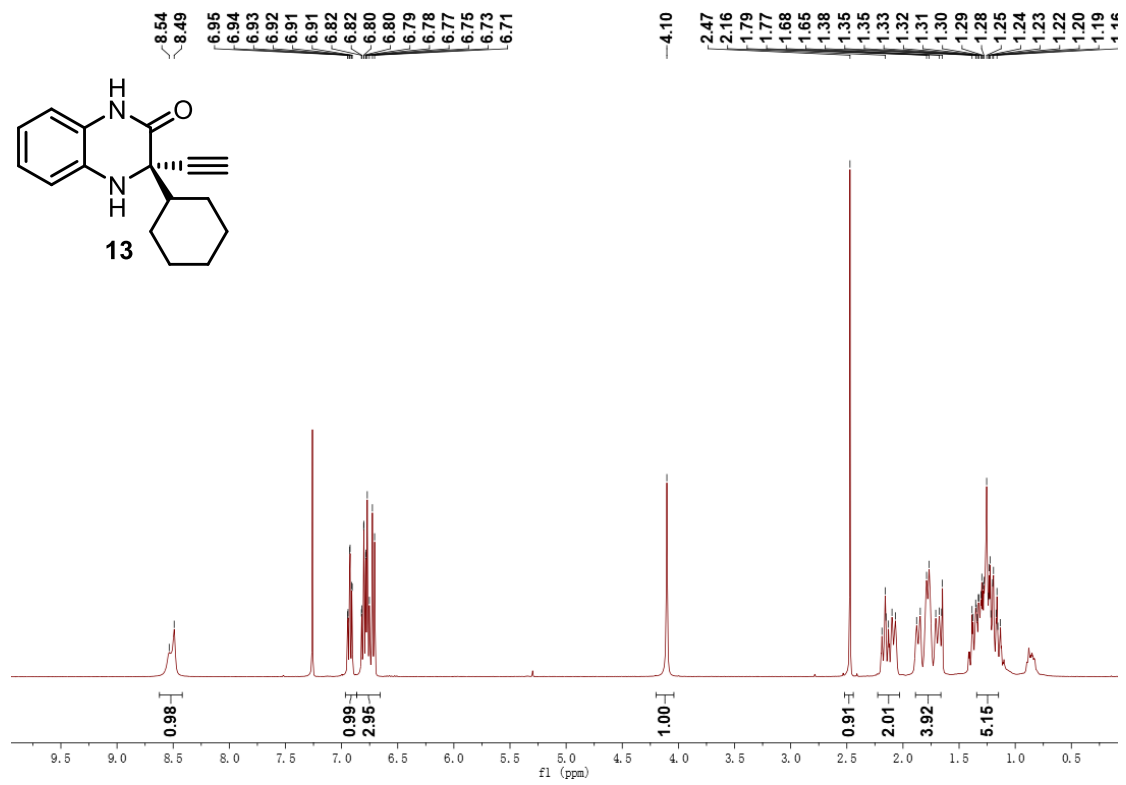

<sup>13</sup>C NMR spectrum (100 MHz, CDCl<sub>3</sub>)

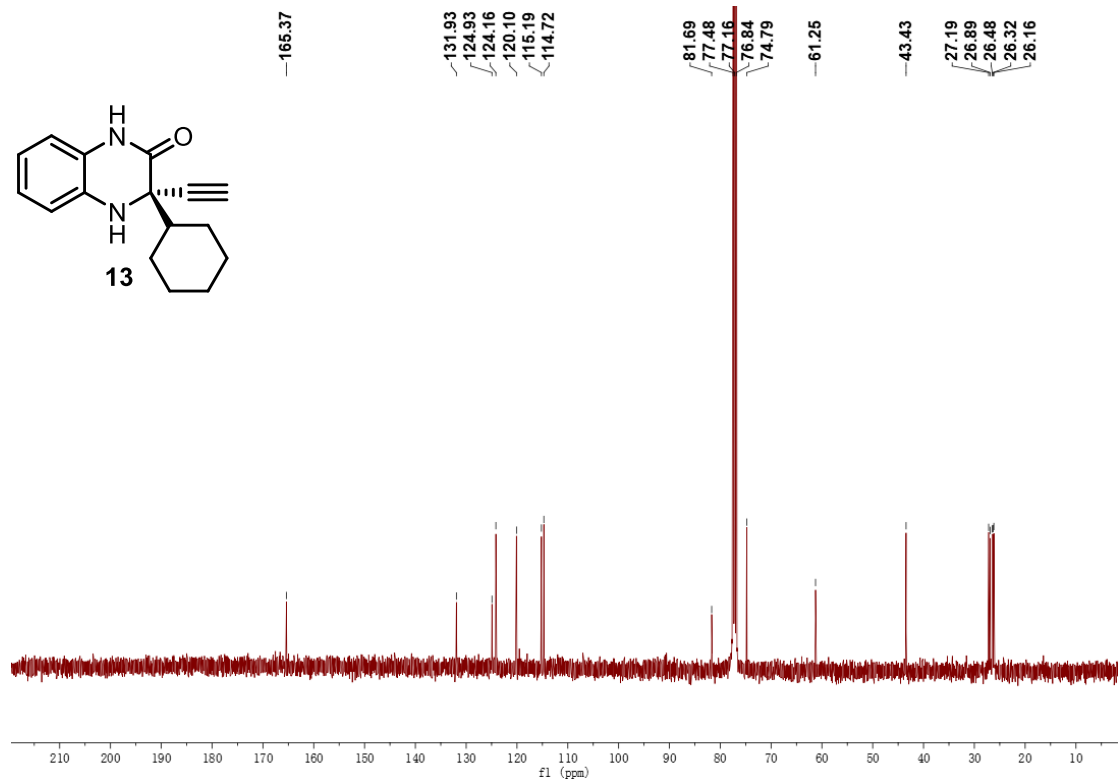



<sup>1</sup>H NMR spectrum (400 MHz, CDCl<sub>3</sub>)

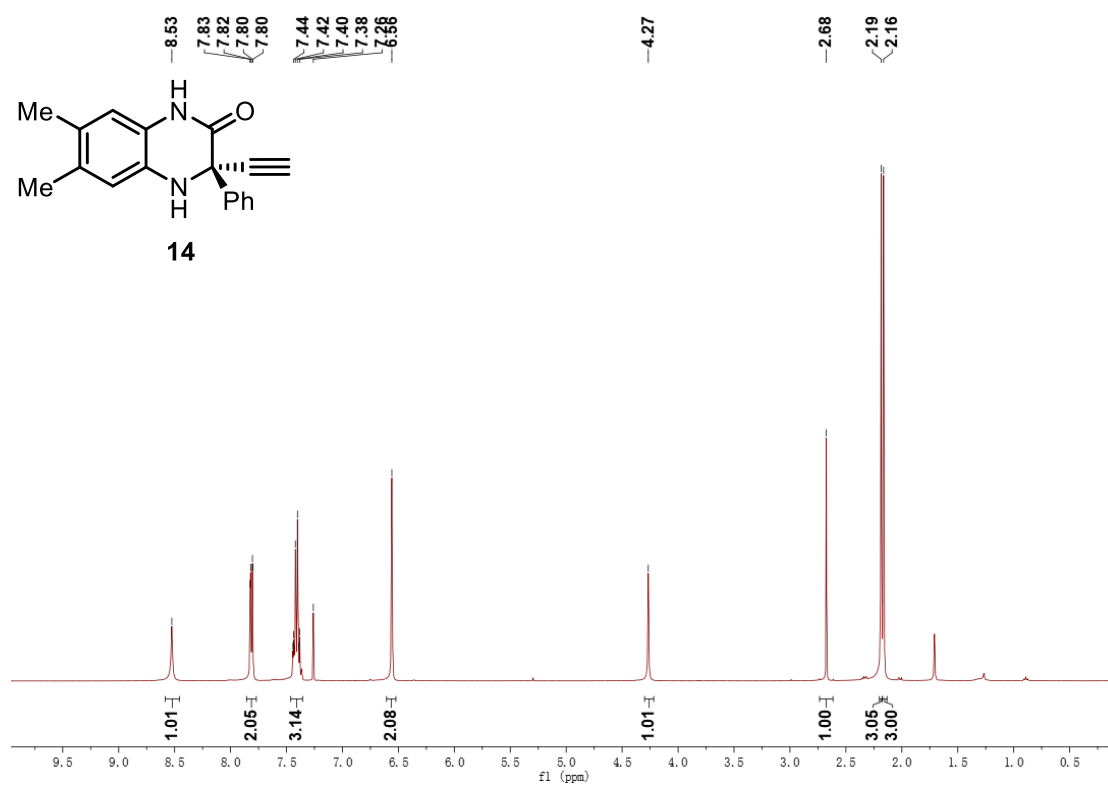

<sup>13</sup>C NMR spectrum (100 MHz, CDCl<sub>3</sub>)

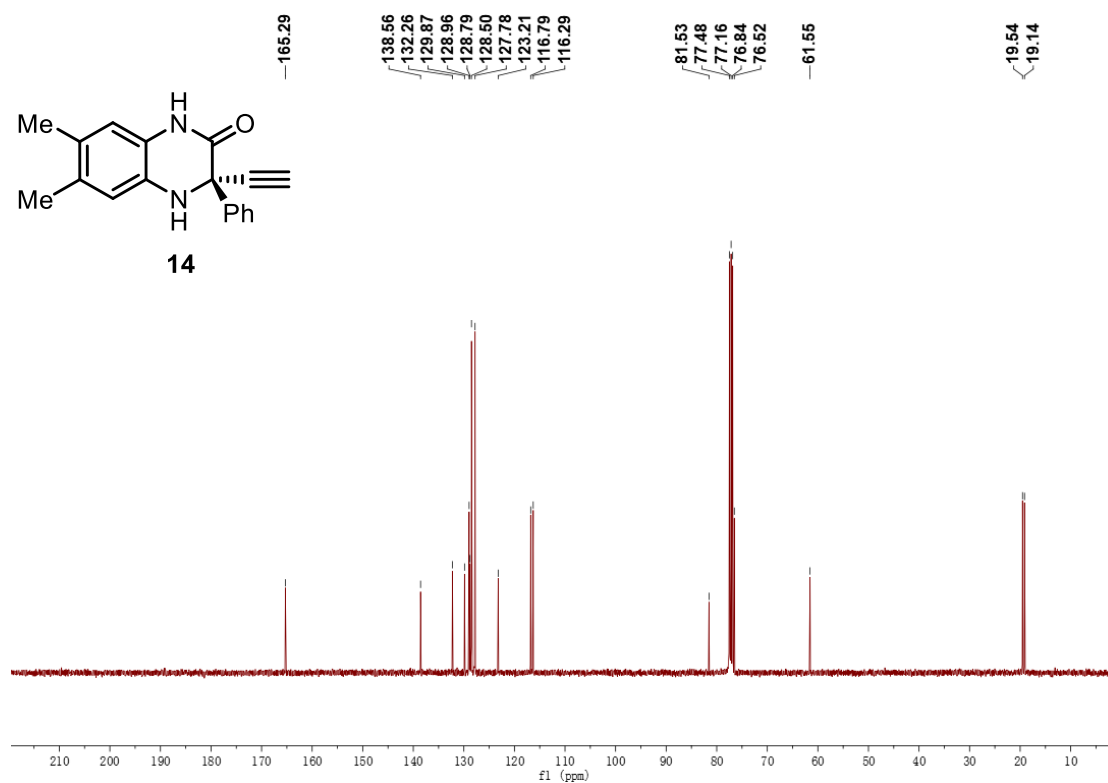

<sup>1</sup>H NMR spectrum (400 MHz, CDCl<sub>3</sub>)

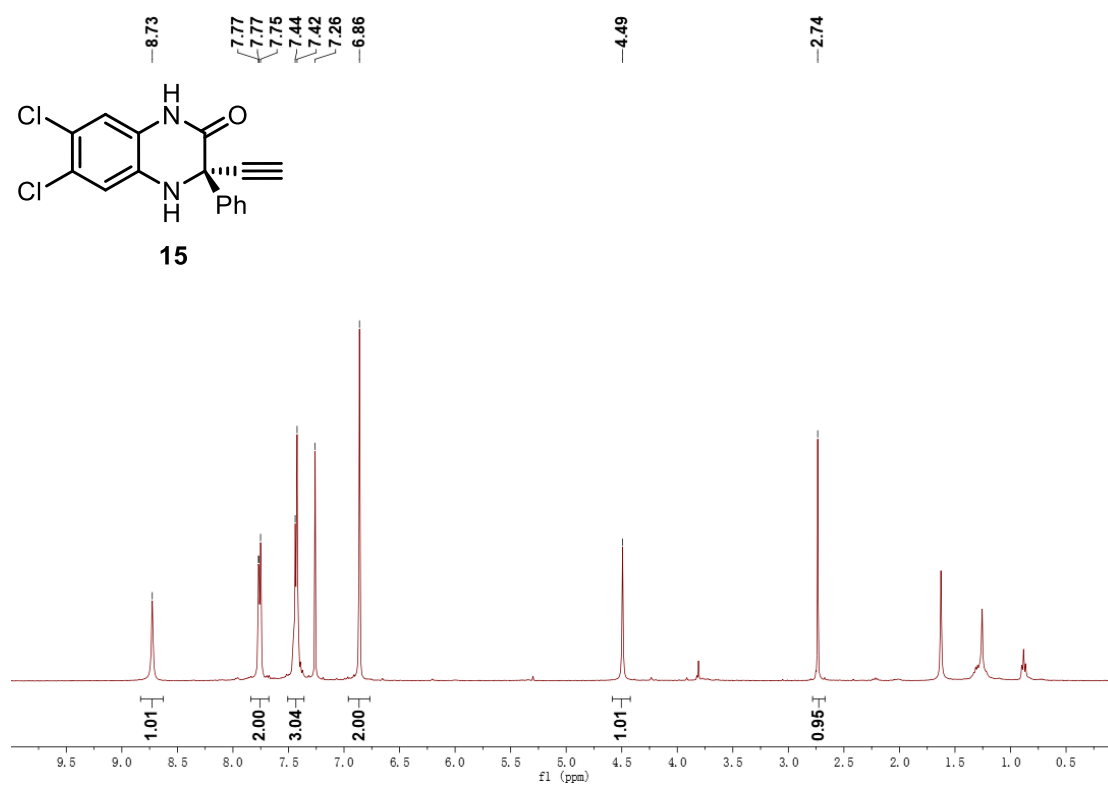

<sup>13</sup>C NMR spectrum (100 MHz, CDCl<sub>3</sub>)

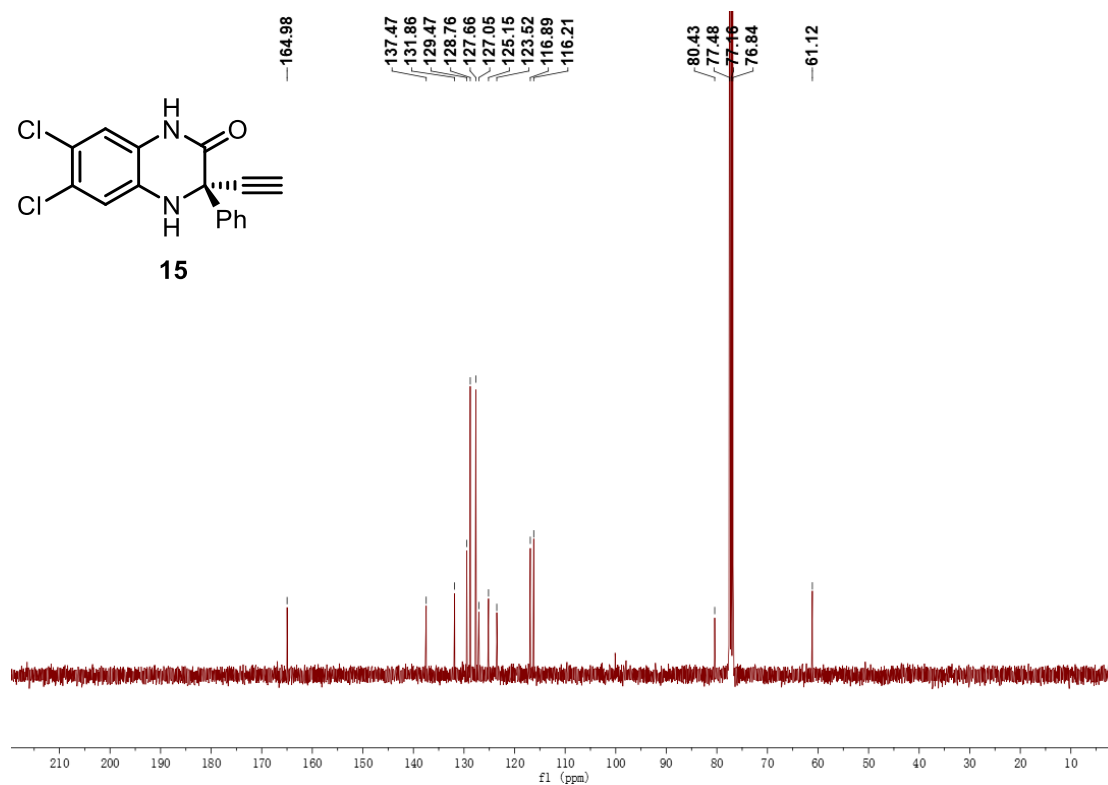

<sup>1</sup>H NMR spectrum (400 MHz, CDCl<sub>3</sub>)

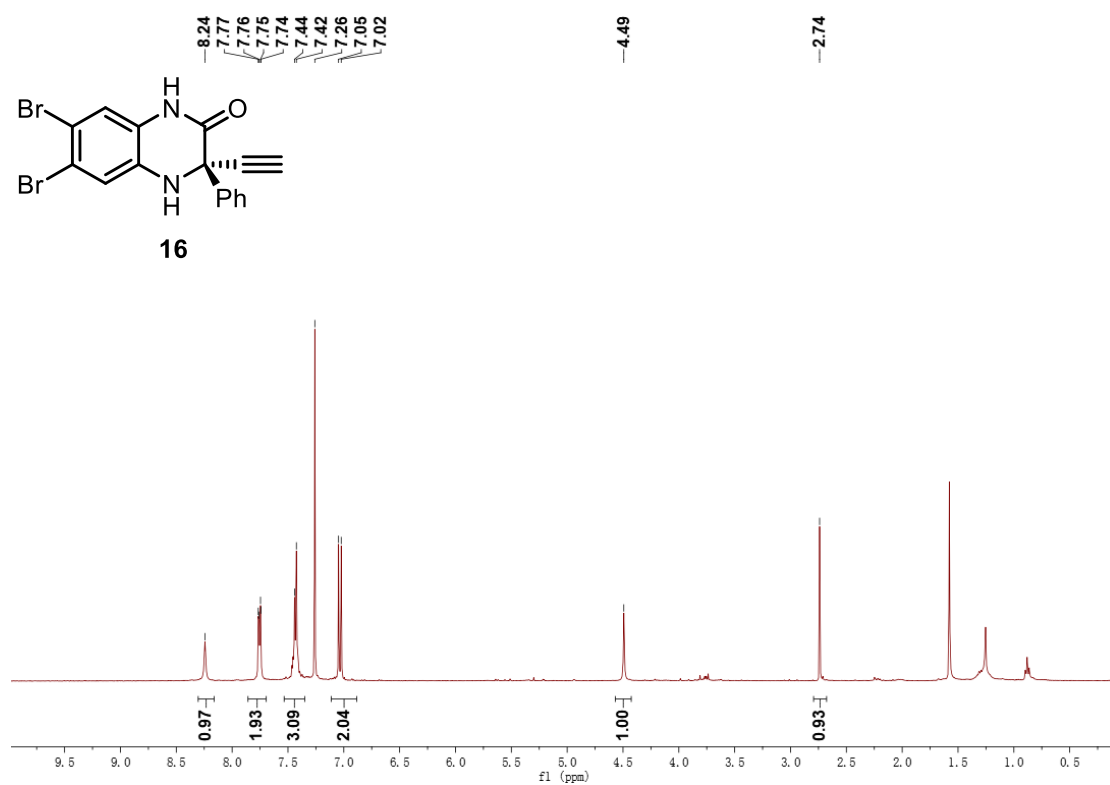

<sup>13</sup>C NMR spectrum (100 MHz, CDCl<sub>3</sub>)

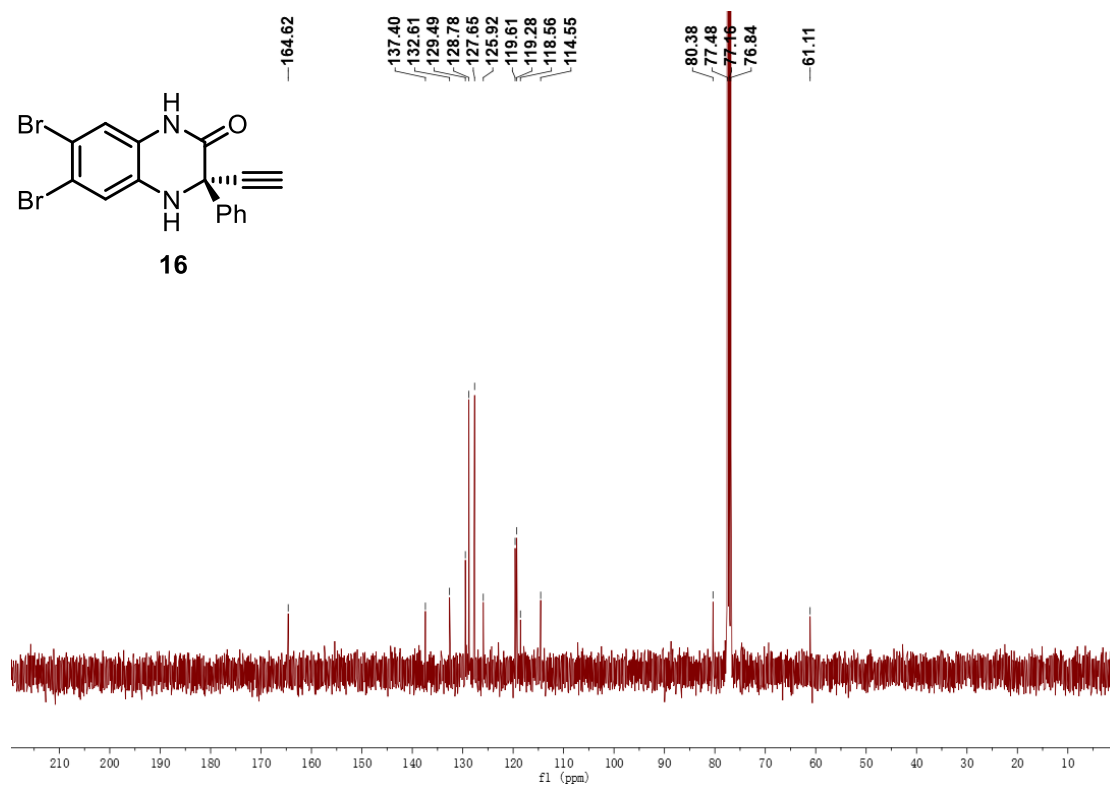

<sup>1</sup>H NMR spectrum (400 MHz, CDCl<sub>3</sub>)

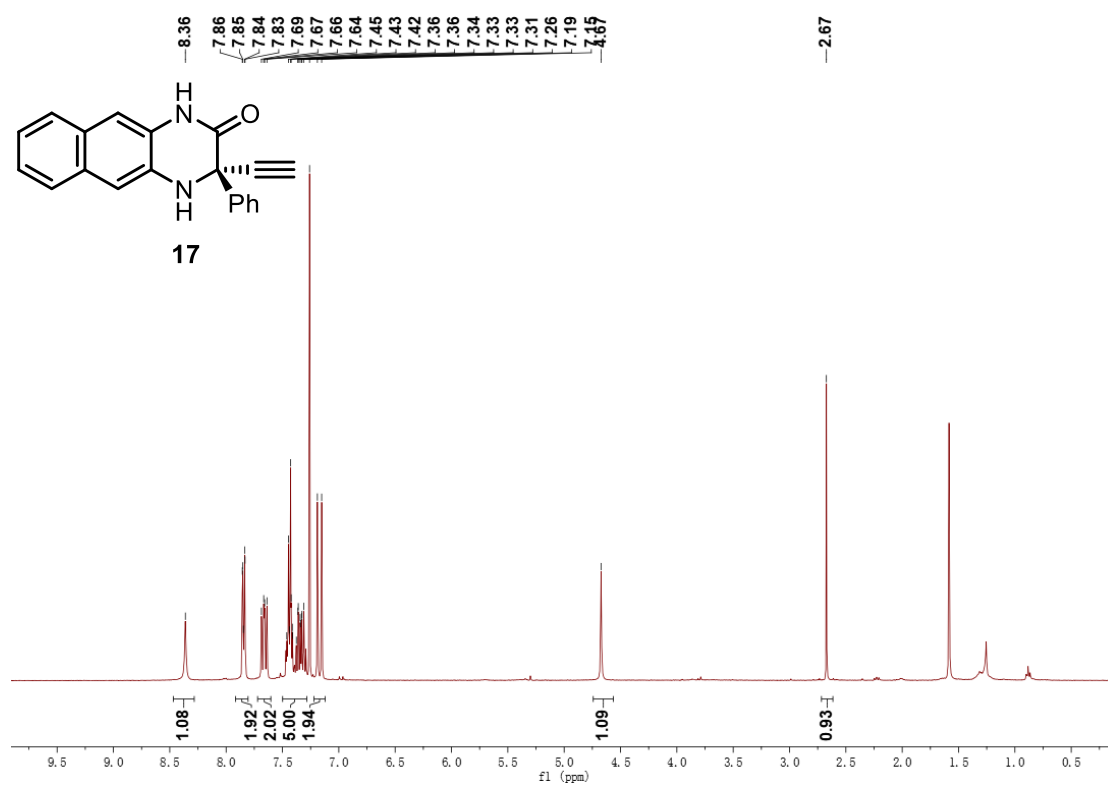

<sup>13</sup>C NMR spectrum (100 MHz, CDCl<sub>3</sub>)

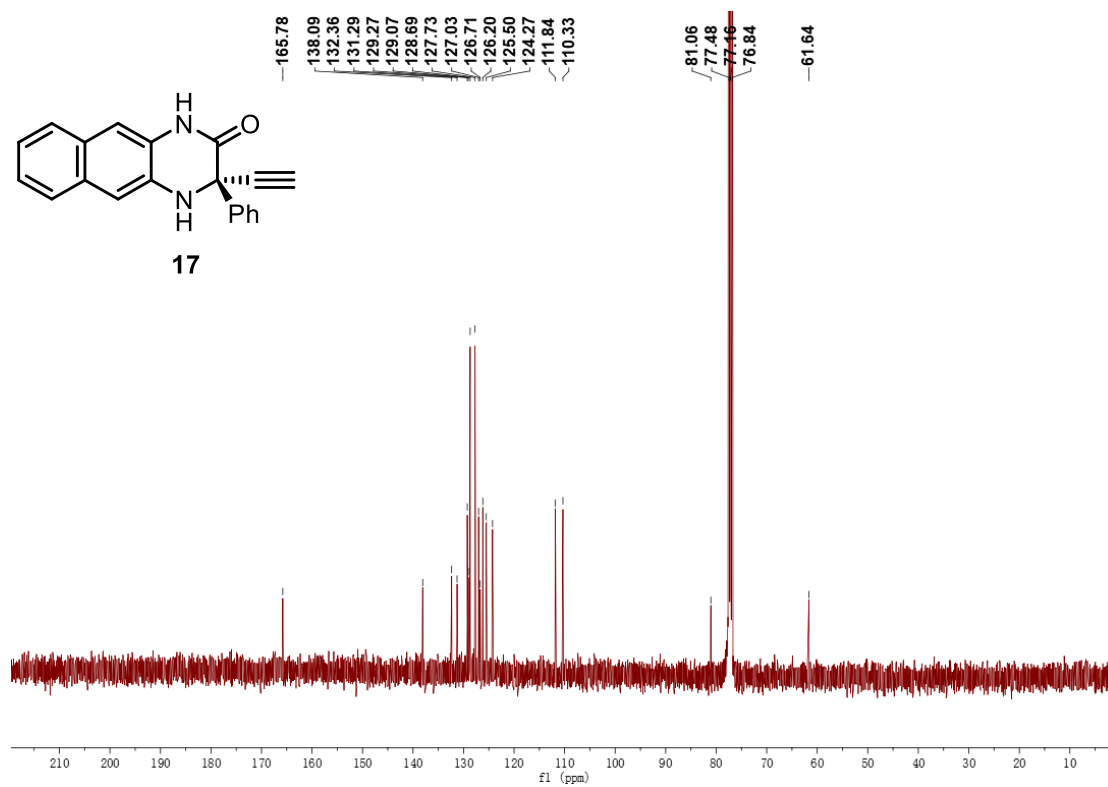

<sup>1</sup>H NMR spectrum (400 MHz, CDCl<sub>3</sub>)

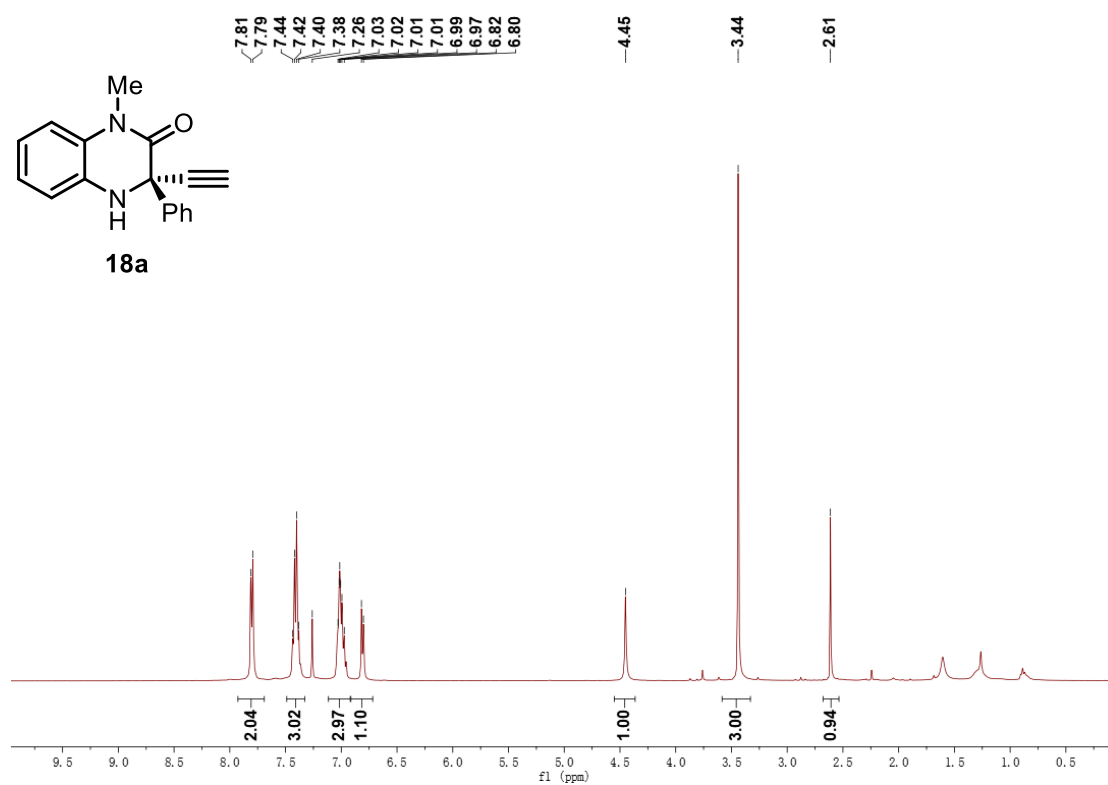

<sup>13</sup>C NMR spectrum (100 MHz, CDCl<sub>3</sub>)

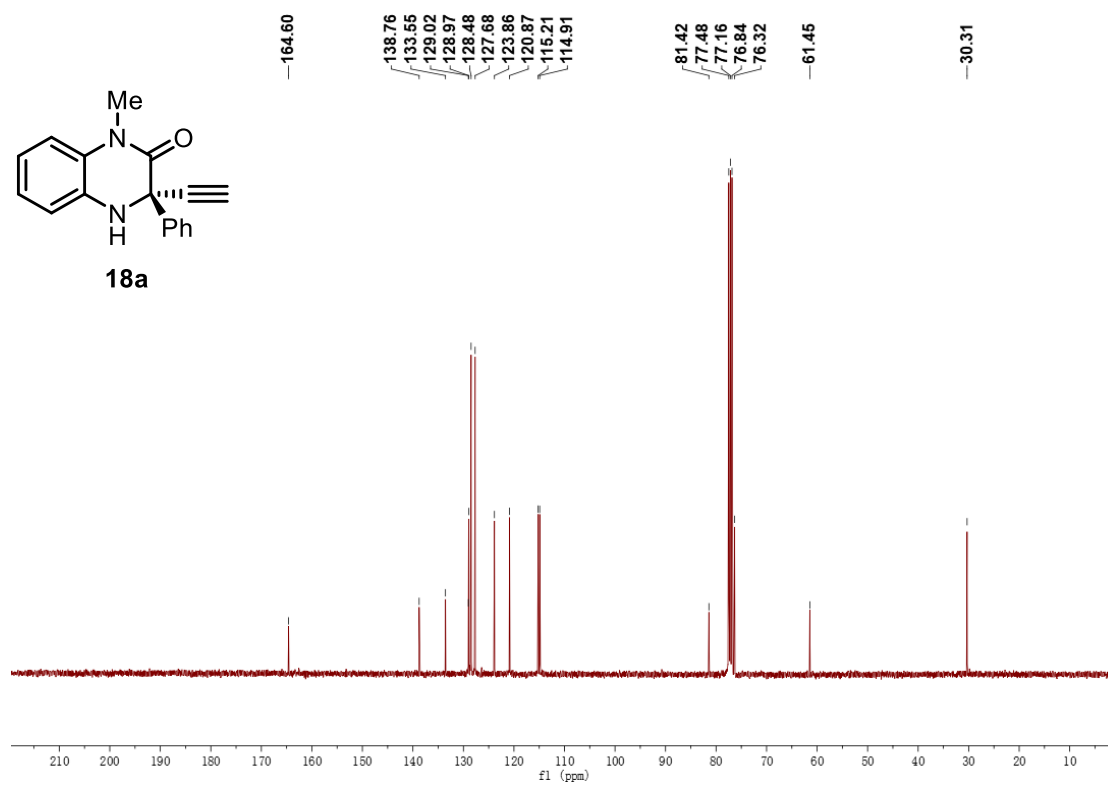

<sup>1</sup>H NMR spectrum (400 MHz, CDCl<sub>3</sub>)

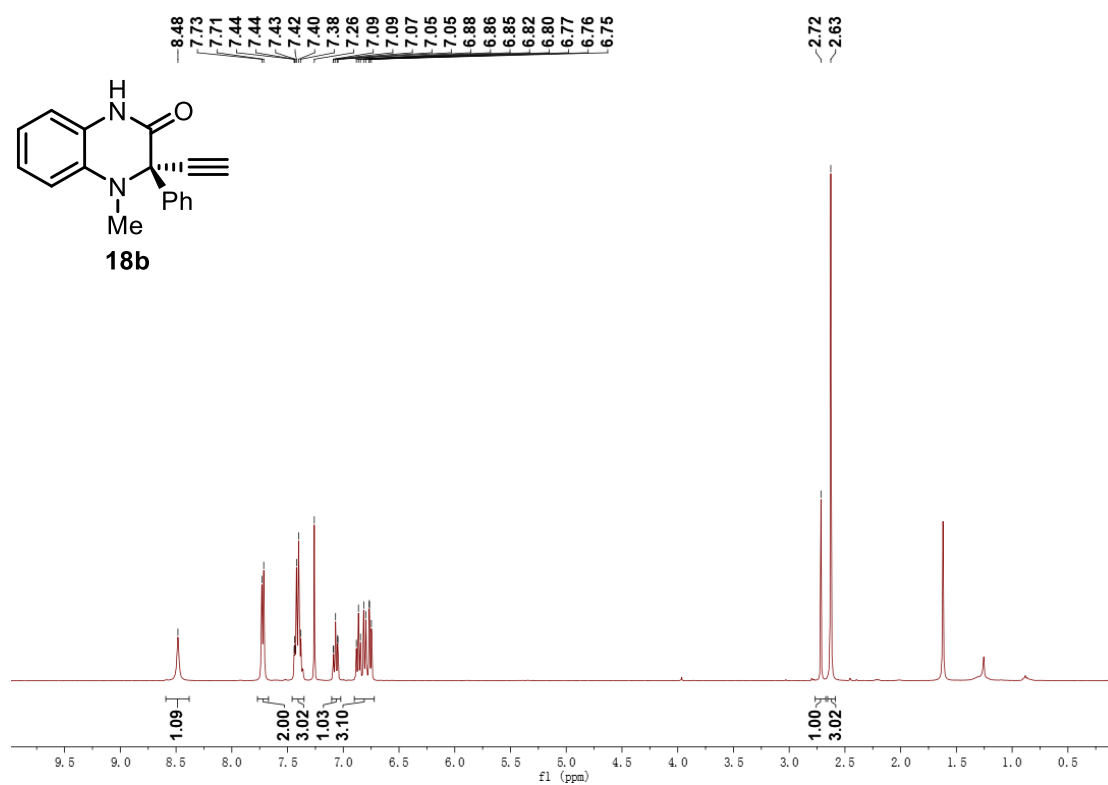

<sup>13</sup>C NMR spectrum (100 MHz, CDCl<sub>3</sub>)

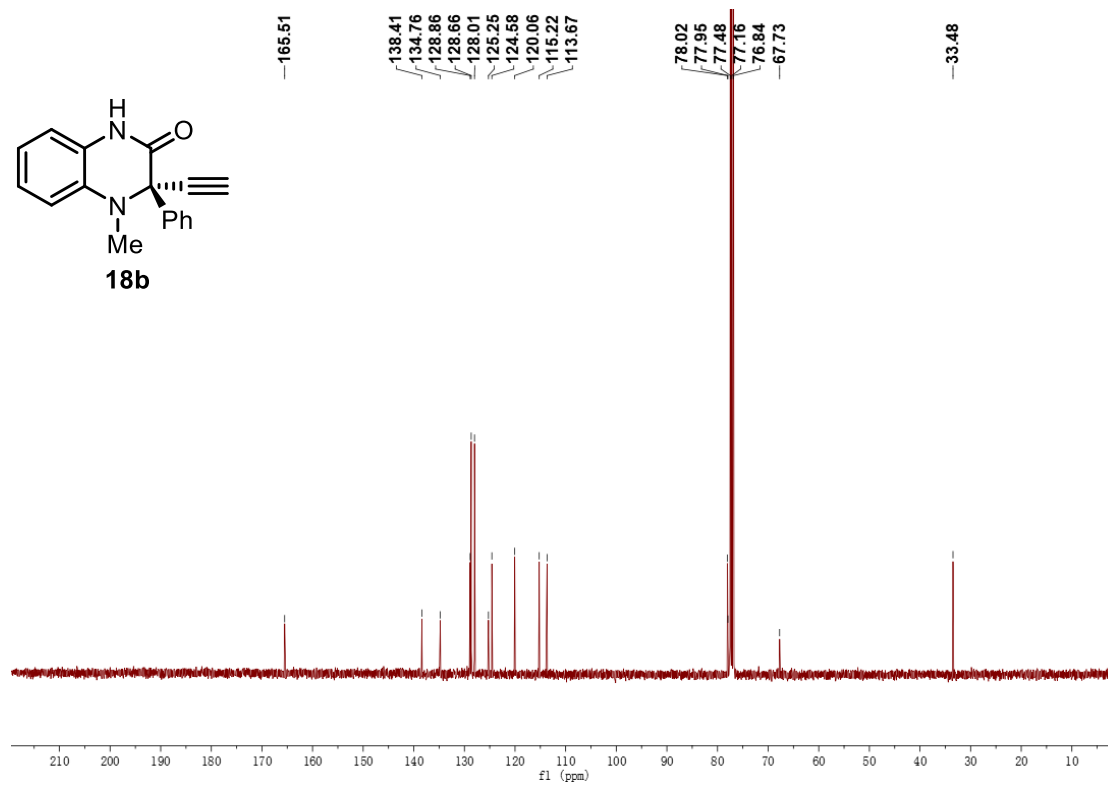

<sup>1</sup>H NMR spectrum (400 MHz, CDCl<sub>3</sub>)

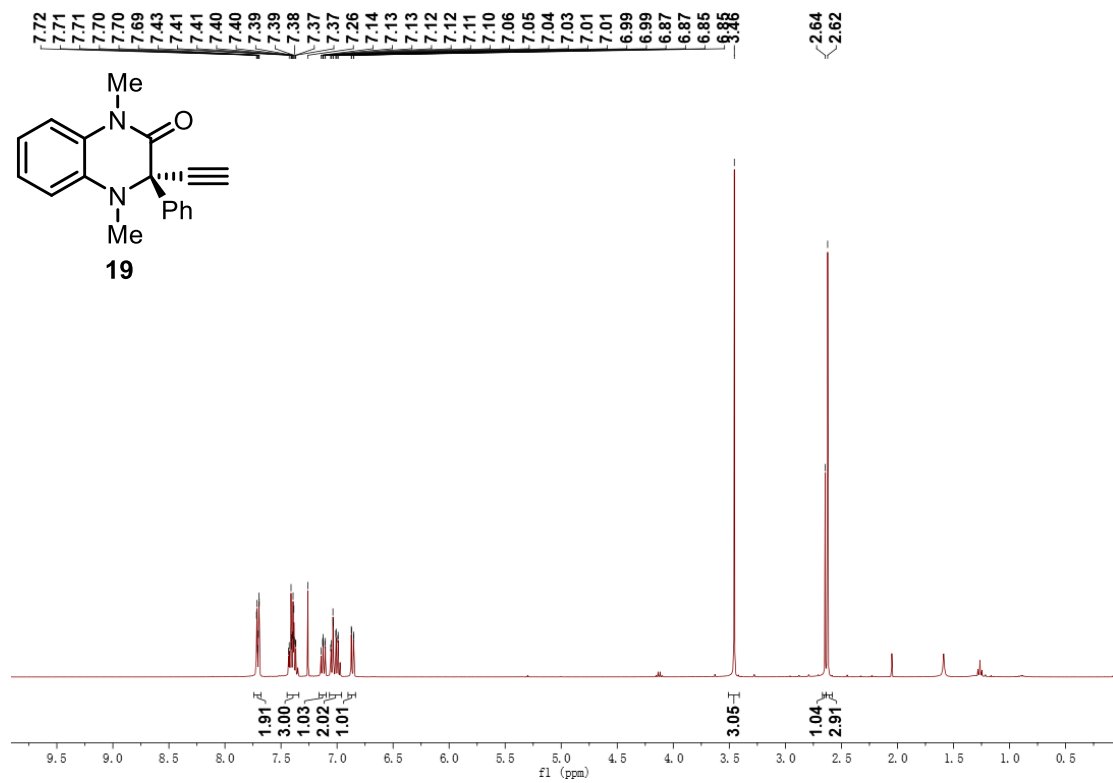

<sup>13</sup>C NMR spectrum (100 MHz, CDCl<sub>3</sub>)

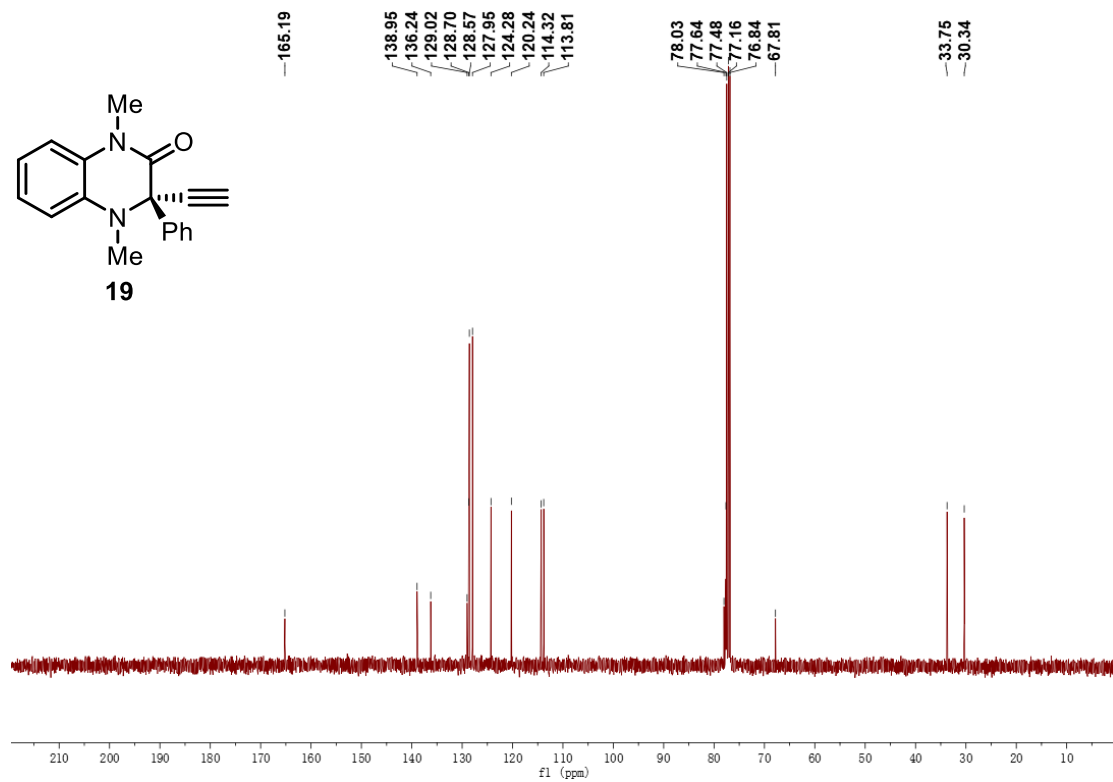

<sup>1</sup>H NMR spectrum (400 MHz, CDCl<sub>3</sub>)

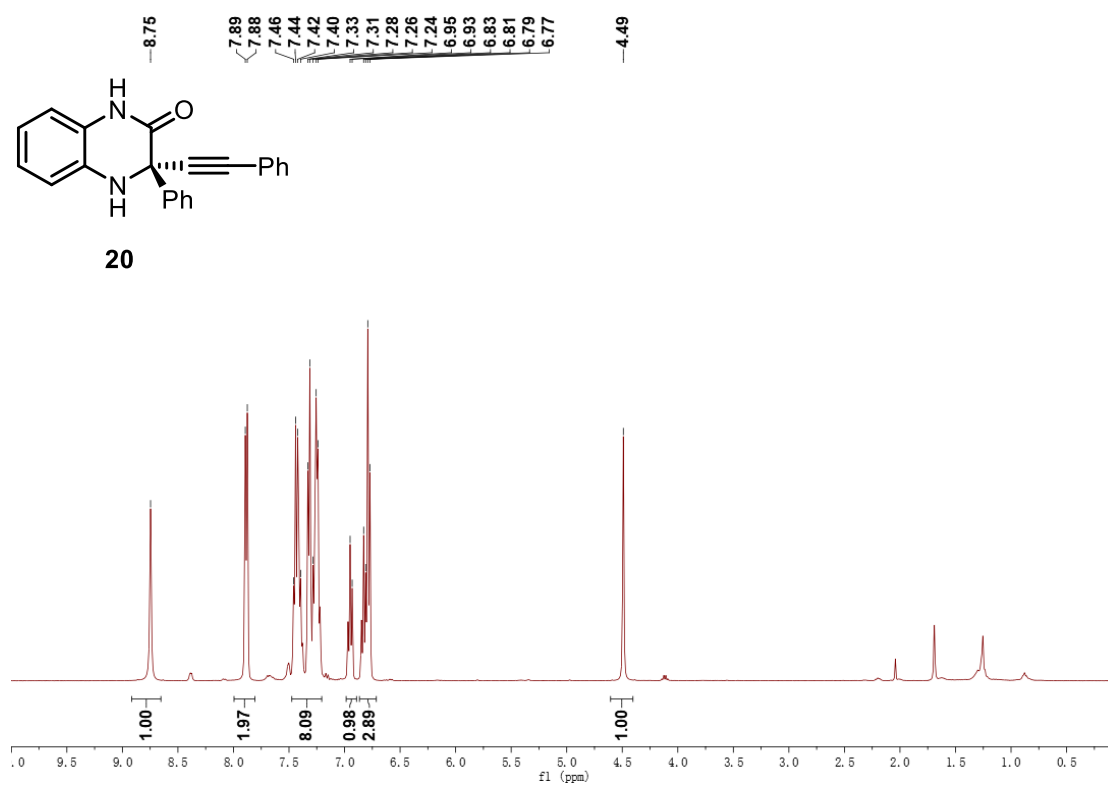

<sup>13</sup>C NMR spectrum (100 MHz, CDCl<sub>3</sub>)

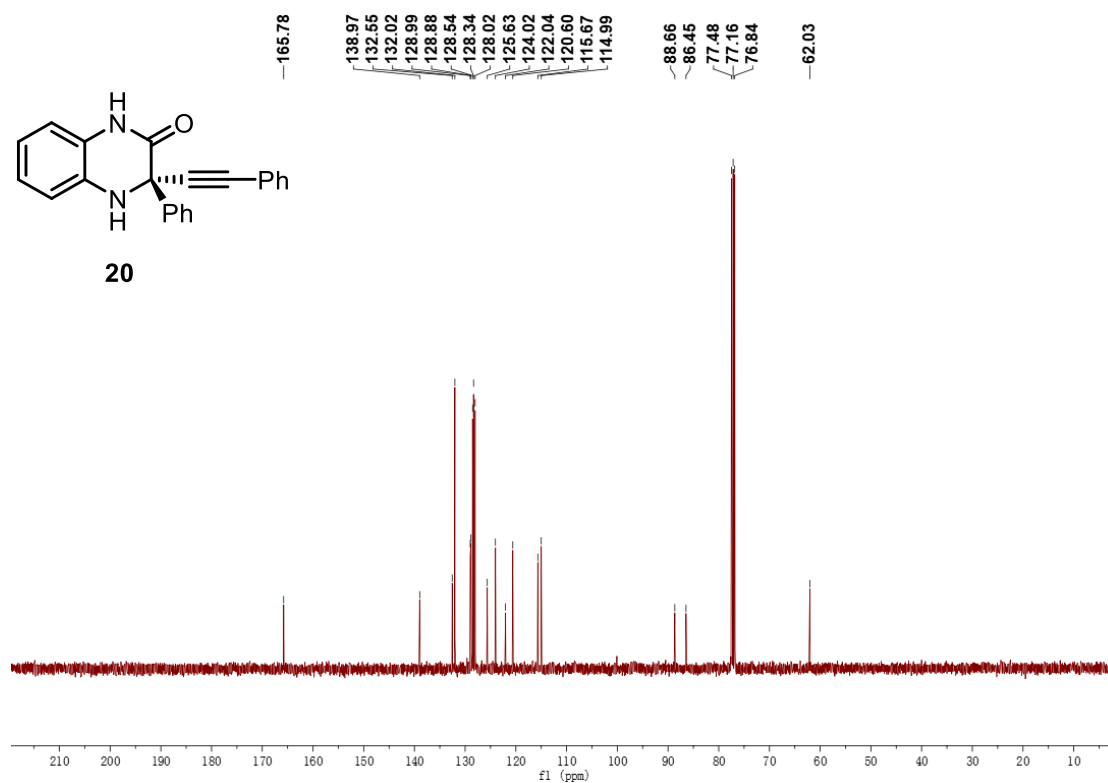



<sup>1</sup>H NMR spectrum (400 MHz, CDCl<sub>3</sub>)

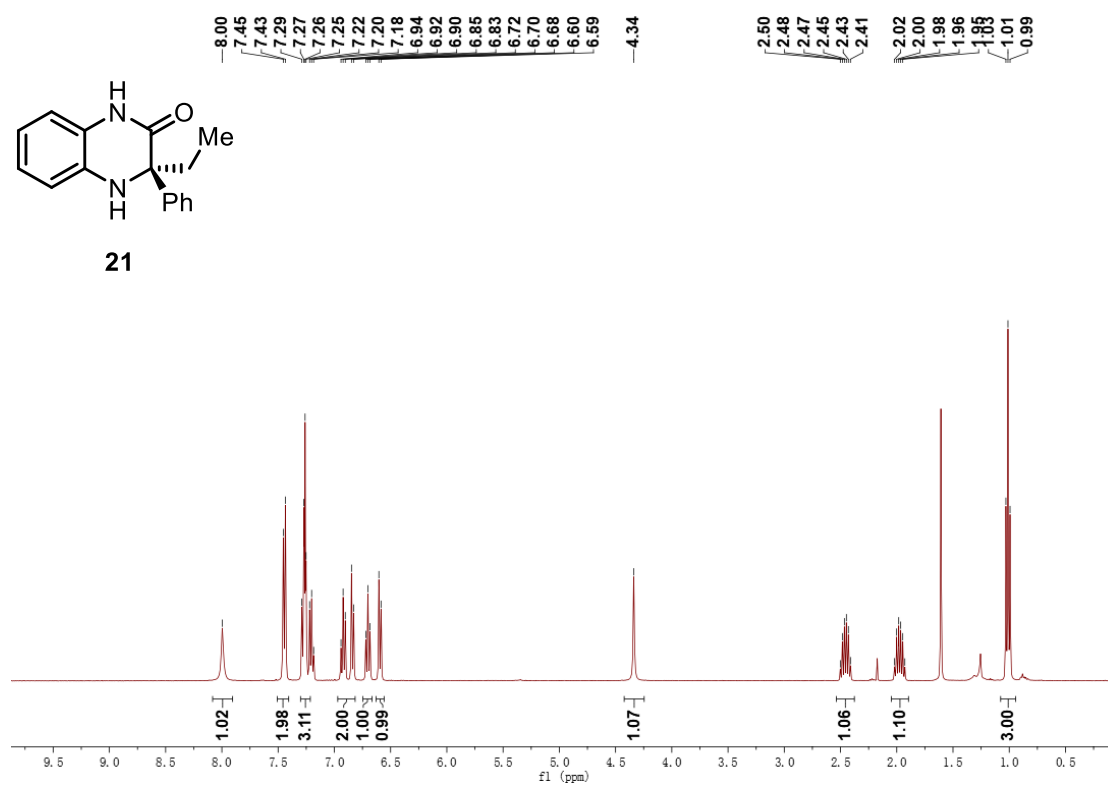

<sup>13</sup>C NMR spectrum (100 MHz, CDCl<sub>3</sub>)

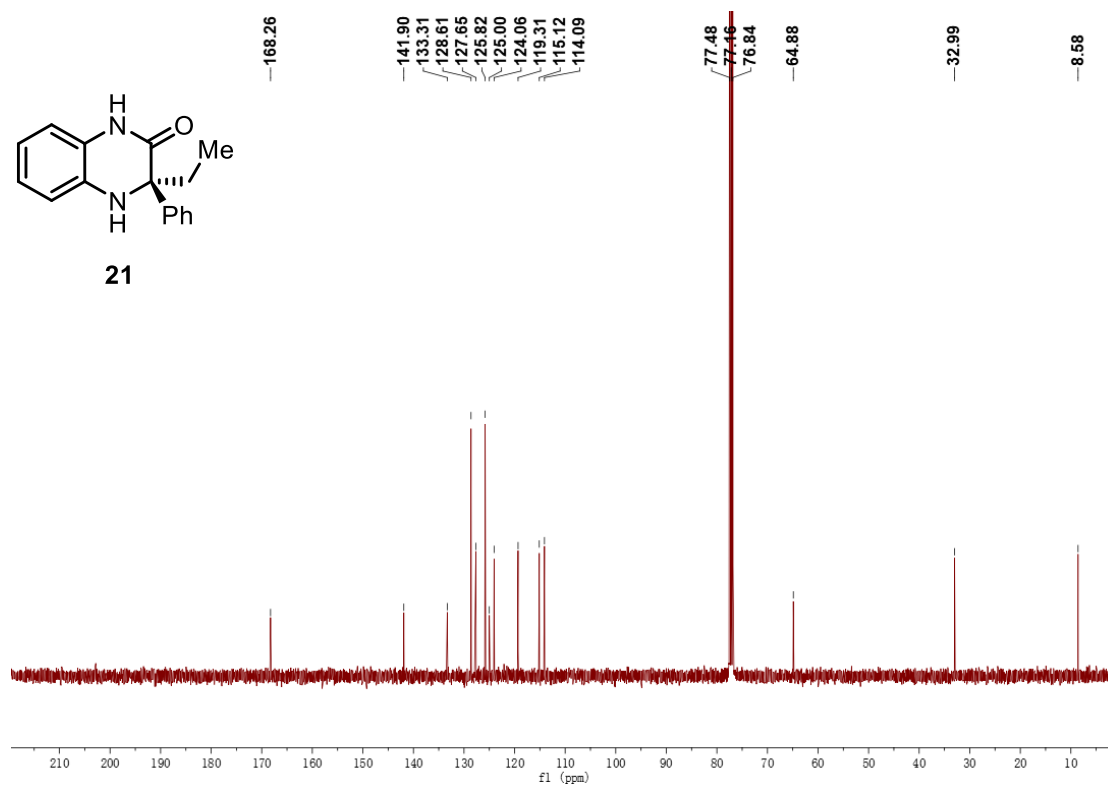

<sup>1</sup>H NMR spectrum (400 MHz, CDCl<sub>3</sub>)

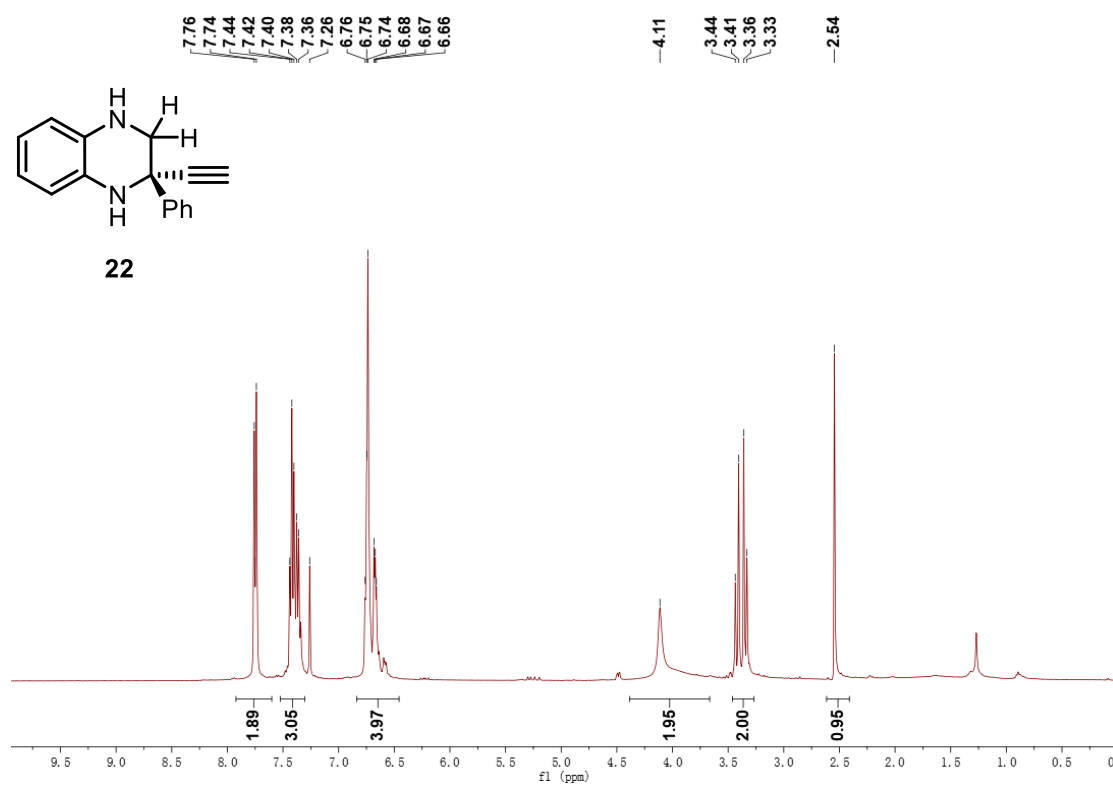

<sup>13</sup>C NMR spectrum (100 MHz, CDCl<sub>3</sub>)

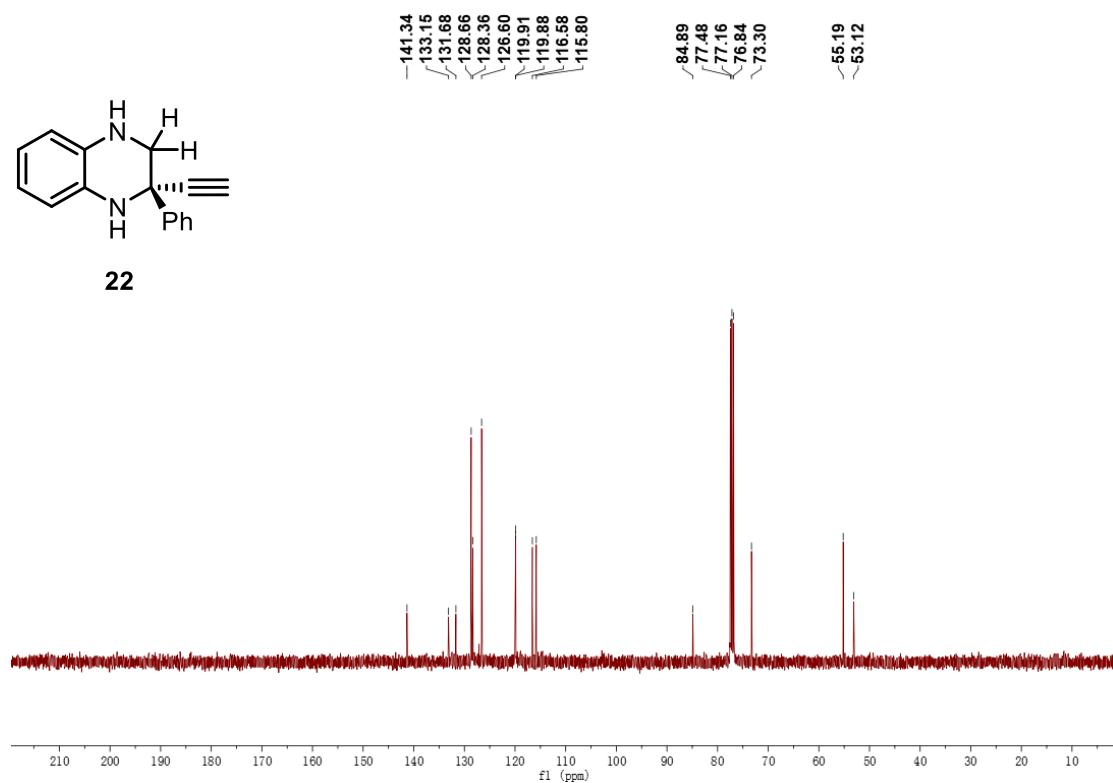

<sup>1</sup>H NMR spectrum (400 MHz, DMSO)

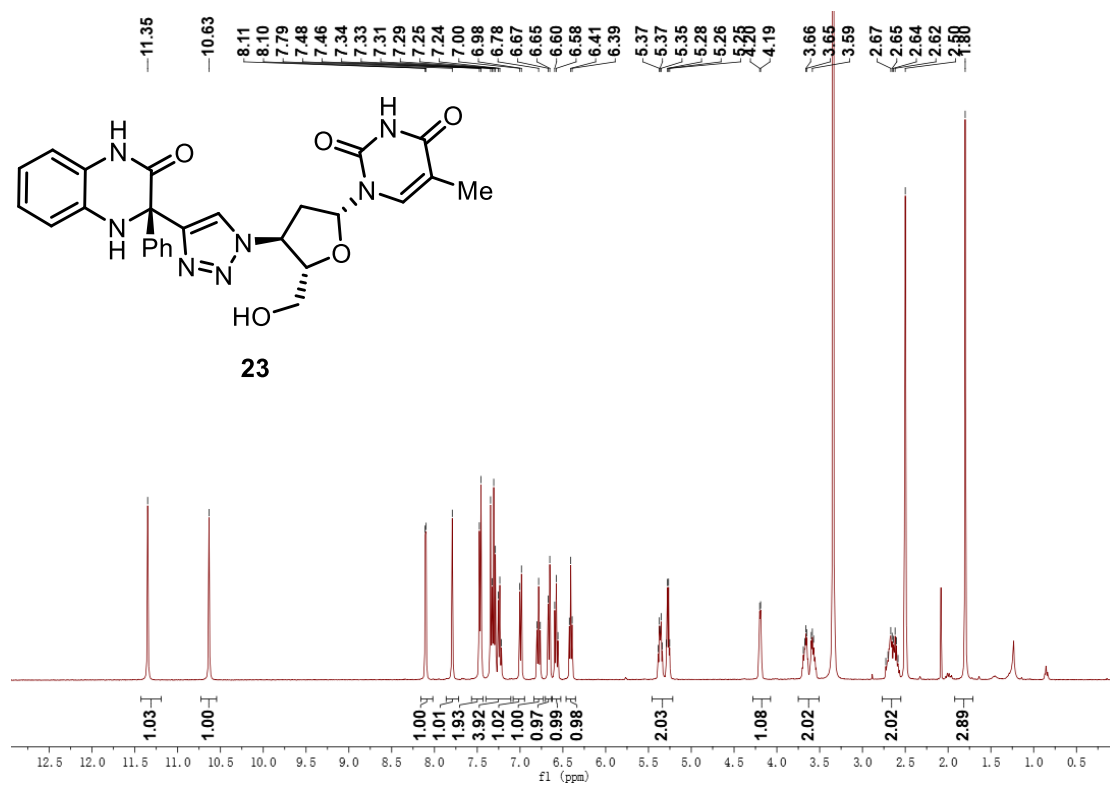

<sup>13</sup>C NMR spectrum (100 MHz, DMSO)

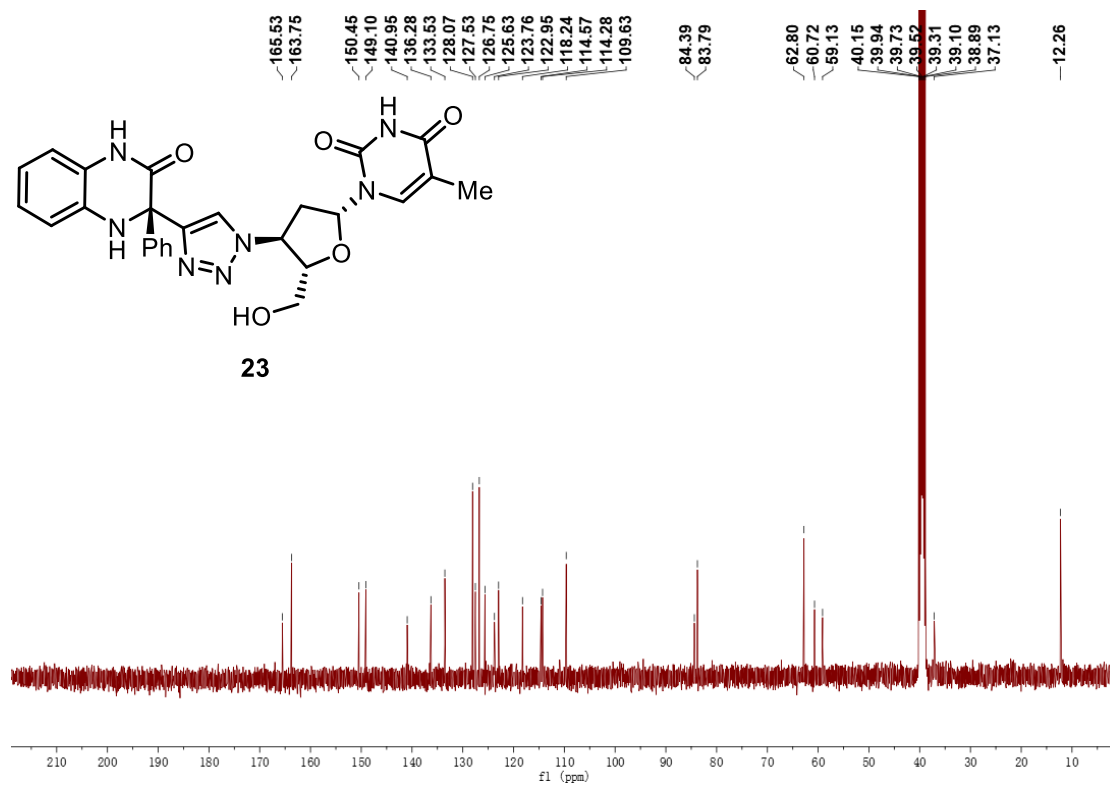

Supplement: d4qo00080c1.pdf [file d4qo00080c1.pdf]
